# Supplementary material for: Variation in SARS-CoV-2 seroprevalence across districts, schools and classes: baseline measurements from a cohort of primary and secondary school children in Switzerland
Source: PubMed Central journal article supplement — BMJ Open. 2021 Jul 26;11(7):e047483. doi: 10.1136/bmjopen-2020-047483 (PMC8316698; doi:10.1136/bmjopen-2020-047483), 2021-07-26
Supplement: bmjopen-2020-047483.draft_revisions.pdf [file bmjopen-2020-047483.draft_revisions.pdf]

# BMJ Open

BMJ Open is committed to open peer review. As part of this commitment we make the peer review history of every article we publish publicly available.

When an article is published we post the peer reviewers' comments and the authors' responses online. We also post the versions of the paper that were used during peer review. These are the versions that the peer review comments apply to.

The versions of the paper that follow are the versions that were submitted during the peer review process. They are not the versions of record or the final published versions. They should not be cited or distributed as the published version of this manuscript.

BMJ Open is an open access journal and the full, final, typeset and author-corrected version of record of the manuscript is available on our site with no access controls, subscription charges or pay-per-view fees (<http://bmjopen.bmj.com>).

If you have any questions on BMJ Open's open peer review process please email [info.bmjopen@bmj.com](mailto:info.bmjopen@bmj.com)

# BMJ Open

## Variation in SARS-CoV-2 seroprevalence in primary and secondary school children across districts, schools and classes in Switzerland

|                               |                                                                                                                                                                                                                                                                                                                                                                                                                                                                                                                                                                                                                                                                                                                                                                                                                                                                                                                                                                                                                                                                                                                                                                                                                                                                                                                                                                                                                                                                                                                                                                               |
|-------------------------------|-------------------------------------------------------------------------------------------------------------------------------------------------------------------------------------------------------------------------------------------------------------------------------------------------------------------------------------------------------------------------------------------------------------------------------------------------------------------------------------------------------------------------------------------------------------------------------------------------------------------------------------------------------------------------------------------------------------------------------------------------------------------------------------------------------------------------------------------------------------------------------------------------------------------------------------------------------------------------------------------------------------------------------------------------------------------------------------------------------------------------------------------------------------------------------------------------------------------------------------------------------------------------------------------------------------------------------------------------------------------------------------------------------------------------------------------------------------------------------------------------------------------------------------------------------------------------------|
| Journal:                      | <i>BMJ Open</i>                                                                                                                                                                                                                                                                                                                                                                                                                                                                                                                                                                                                                                                                                                                                                                                                                                                                                                                                                                                                                                                                                                                                                                                                                                                                                                                                                                                                                                                                                                                                                               |
| Manuscript ID                 | bmjopen-2020-047483                                                                                                                                                                                                                                                                                                                                                                                                                                                                                                                                                                                                                                                                                                                                                                                                                                                                                                                                                                                                                                                                                                                                                                                                                                                                                                                                                                                                                                                                                                                                                           |
| Article Type:                 | Original research                                                                                                                                                                                                                                                                                                                                                                                                                                                                                                                                                                                                                                                                                                                                                                                                                                                                                                                                                                                                                                                                                                                                                                                                                                                                                                                                                                                                                                                                                                                                                             |
| Date Submitted by the Author: | 01-Dec-2020                                                                                                                                                                                                                                                                                                                                                                                                                                                                                                                                                                                                                                                                                                                                                                                                                                                                                                                                                                                                                                                                                                                                                                                                                                                                                                                                                                                                                                                                                                                                                                   |
| Complete List of Authors:     | <p>Ulyte, Agne; University of Zurich, Epidemiology, Biostatistics and Prevention Institute (EBPI)</p> <p>Radtke, Thomas; University of Zurich, Epidemiology, Biostatistics and Prevention Institute (EBPI)</p> <p>Abela, Irene; University of Zurich, Institute of Medical Virology</p> <p>Haile, S; University of Zurich, Epidemiology, Biostatistics and Prevention Institute (EBPI)</p> <p>Blankenberger, Jacob; University of Zurich, Epidemiology, Biostatistics and Prevention Institute (EBPI)</p> <p>Jung, Ruedi; University of Zurich, Epidemiology, Biostatistics and Prevention Institute (EBPI)</p> <p>Capelli, Celine; University of Zurich, Epidemiology, Biostatistics and Prevention Institute (EBPI)</p> <p>Berger, Christoph; University Children's Hospital Zürich</p> <p>Frei, Anja; University of Zurich, Epidemiology, Biostatistics and Prevention Institute (EBPI)</p> <p>Huber, Michael; University of Zurich, Institute of Medical Virology;</p> <p>Schanz, Merle; University of Zurich, Institute of Medical Virology</p> <p>Schwarzmueller, Magdalena; University of Zurich, Institute of Medical Virology</p> <p>Trkola, Alexandra; University of Zurich, Institute of Medical Virology</p> <p>Fehr, Jan; University Hospital Zurich, Division of Infectious Diseases &amp; Hospital Epidemiology; University of Zurich, Epidemiology, Biostatistics and Prevention Institute (EBPI)</p> <p>Puhan, Milo; University of Zurich, Institute of Epidemiology, Biostatistics &amp; Prevention (EBPI)</p> <p>Kriemler, Susi; University of Zurich,</p> |
| Keywords:                     | Paediatric infectious disease & immunisation < PAEDIATRICALS, Infection control < INFECTIOUS DISEASES, Epidemiology < INFECTIOUS DISEASES, VIROLOGY, Community child health < PAEDIATRICALS                                                                                                                                                                                                                                                                                                                                                                                                                                                                                                                                                                                                                                                                                                                                                                                                                                                                                                                                                                                                                                                                                                                                                                                                                                                                                                                                                                                   |
|                               |                                                                                                                                                                                                                                                                                                                                                                                                                                                                                                                                                                                                                                                                                                                                                                                                                                                                                                                                                                                                                                                                                                                                                                                                                                                                                                                                                                                                                                                                                                                                                                               |

SCHOLARONE™  
Manuscripts

1  
2  
3  
4  
5  
6  
7  
8  
9  
10  
11  
12  
13  
14  
15  
16  
17  
18  
19  
20  
21  
22  
23  
24  
25  
26  
27  
28  
29  
30  
31  
32  
33  
34  
35  
36  
37  
38  
39  
40  
41  
42  
43  
44  
45  
46  
47  
48  
49  
50  
51  
52  
53  
54  
55  
56  
57  
58  
59  
60

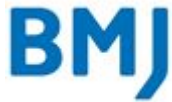

I, the Submitting Author has the right to grant and does grant on behalf of all authors of the Work (as defined in the below author licence), an exclusive licence and/or a non-exclusive licence for contributions from authors who are: i) UK Crown employees; ii) where BMJ has agreed a CC-BY licence shall apply, and/or iii) in accordance with the terms applicable for US Federal Government officers or employees acting as part of their official duties; on a worldwide, perpetual, irrevocable, royalty-free basis to BMJ Publishing Group Ltd ("BMJ") its licensees and where the relevant Journal is co-owned by BMJ to the co-owners of the Journal, to publish the Work in this journal and any other BMJ products and to exploit all rights, as set out in our [licence](#).

The Submitting Author accepts and understands that any supply made under these terms is made by BMJ to the Submitting Author unless you are acting as an employee on behalf of your employer or a postgraduate student of an affiliated institution which is paying any applicable article publishing charge ("APC") for Open Access articles. Where the Submitting Author wishes to make the Work available on an Open Access basis (and intends to pay the relevant APC), the terms of reuse of such Open Access shall be governed by a Creative Commons licence – details of these licences and which [Creative Commons](#) licence will apply to this Work are set out in our licence referred to above.

Other than as permitted in any relevant BMJ Author's Self Archiving Policies, I confirm this Work has not been accepted for publication elsewhere, is not being considered for publication elsewhere and does not duplicate material already published. I confirm all authors consent to publication of this Work and authorise the granting of this licence.

**1 Title**

2 Variation in SARS-CoV-2 seroprevalence in primary and secondary school children across  
3 districts, schools and classes in Switzerland

**5 Authors**

6 Agne Ulyte\*, doctoral student, Thomas Radtke\*, senior researcher, Irene A. Abela\*,  
7 researcher, Sarah R. Haile, senior statistician, Jacob Blankenberger, master student, Ruedi  
8 Jung, researcher, Céline Capelli, master student, Christoph Berger, professor, Anja Frei,  
9 senior researcher, Michael Huber, researcher, Merle Schanz, researcher, Magdalena  
10 Schwarzmüller, doctoral student, Alexandra Trkola#, professor, Jan Fehr#, professor, Milo  
11 A. Puhan#, professor, Susi Kriemler\$#, professor

12 \* shared first authorship

13 # shared last authorship

**15 Corresponding author:**

16 Susi Kriemler

17 Tel: +41 44 634 63 20

18 susi.kriemlerwiget@uzh.ch

19 Epidemiology, Biostatistics and Prevention Institute (EBPI), University of Zurich

20 Hirschengraben 84

21 8001 Zürich, Switzerland

23 **Agne Ulyte**, [agne.ulyte@uzh.ch](mailto:agne.ulyte@uzh.ch), Epidemiology, Biostatistics and Prevention Institute (EBPI),  
24 University of Zurich, Hirschengraben 84, 8001 Zürich, Switzerland

25 **Thomas Radtke**, [thomas.radtke@uzh.ch](mailto:thomas.radtke@uzh.ch), Epidemiology, Biostatistics and Prevention  
26 Institute (EBPI), University of Zurich, Hirschengraben 84, 8001 Zürich, Switzerland

27 **Irene A. Abela**, [irene.abela@usz.ch](mailto:irene.abela@usz.ch), Institute of Medical Virology, University of Zurich,  
28 Winterthurerstrasse 190, 8057 Zürich, Switzerland

29 **Sarah R. Haile**, [sarah.haile@uzh.ch](mailto:sarah.haile@uzh.ch), Epidemiology, Biostatistics and Prevention Institute  
30 (EBPI), University of Zurich, Hirschengraben 84, 8001 Zürich, Switzerland

31 **Jacob Blankenberger**, [jacob.blankenberger@uzh.ch](mailto:jacob.blankenberger@uzh.ch), Epidemiology, Biostatistics and  
32 Prevention Institute (EBPI), University of Zurich, Hirschengraben 84, 8001 Zürich,  
33 Switzerland

34 **Ruedi Jung**, [ruedi.jung@uzh.ch](mailto:ruedi.jung@uzh.ch), Epidemiology, Biostatistics and Prevention Institute (EBPI),

1  
2  
3  
4  
5  
6  
7  
8  
9  
10  
11  
12  
13  
14  
15  
16  
17  
18  
19  
20  
21  
22  
23  
24  
25  
26  
27  
28  
29  
30  
31  
32  
33  
34  
35  
36  
37  
38  
39  
40  
41  
42  
43  
44  
45  
46  
47  
48  
49  
50  
51  
52  
53  
54  
55  
56  
57  
58  
59  
60

University of Zurich, Hirschengraben 84, 8001 Zürich, Switzerland

**Céline Capelli**, [celine.capelli@uzh.ch](mailto:celine.capelli@uzh.ch), Epidemiology, Biostatistics and Prevention Institute (EBPI), University of Zurich, Hirschengraben 84, 8001 Zürich, Switzerland

**Christoph Berger**, [Christoph.Berger@kispi.uzh.ch](mailto:Christoph.Berger@kispi.uzh.ch), University Children Hospital Zurich, Steinwiesstrasse 75, 8032 Zürich, Switzerland

**Anja Frei**, [anja.frei@uzh.ch](mailto:anja.frei@uzh.ch), Epidemiology, Biostatistics and Prevention Institute (EBPI), University of Zurich, Hirschengraben 84, 8001 Zürich, Switzerland

**Michael Huber**, [huber.michael@virology.uzh.ch](mailto:huber.michael@virology.uzh.ch), Institute of Medical Virology, University of Zurich, Winterthurerstrasse 190, 8057 Zürich, Switzerland

**Merle Schanz**, [schanz.merle@virology.uzh.ch](mailto:schanz.merle@virology.uzh.ch), Institute of Medical Virology, University of Zurich, Winterthurerstrasse 190, 8057 Zürich, Switzerland

**Magdalena Schwarzmueller**, [schwarzmueller.magdalena@virology.uzh.ch](mailto:schwarzmueller.magdalena@virology.uzh.ch), Institute of Medical Virology, University of Zurich, Winterthurerstrasse 190, 8057 Zürich, Switzerland

**Alexandra Trkola**, [trkola.alexandra@virology.uzh.ch](mailto:trkola.alexandra@virology.uzh.ch), Institute of Medical Virology, University of Zurich, Winterthurerstrasse 190, 8057 Zürich, Switzerland

**Jan Fehr**, [Jan.Fehr@usz.ch](mailto:Jan.Fehr@usz.ch), Epidemiology, Biostatistics and Prevention Institute (EBPI), University of Zurich, Hirschengraben 84, 8001 Zürich; Division of Infectious Diseases & Hospital Epidemiology, University Hospital Zurich, Rämistrasse 100, 8091 Zurich, Switzerland

**Milo A. Puhan**, [miloalan.puhan@uzh.ch](mailto:miloalan.puhan@uzh.ch), Epidemiology, Biostatistics and Prevention Institute (EBPI), University of Zurich, Hirschengraben 84, 8001 Zürich, Switzerland

**Susi Kriemler**, [susi.kriemlerwiget@uzh.ch](mailto:susi.kriemlerwiget@uzh.ch), Epidemiology, Biostatistics and Prevention Institute (EBPI), University of Zurich, Hirschengraben 84, 8001 Zürich, Switzerland

Word count: 2874

**Abstract**

**Objectives:** To determine the variation in SARS-CoV-2 seroprevalence in school children, and the relationship with self-reported symptoms.

**Design:** Baseline measurements of a longitudinal cohort study (*Ciao Corona*) from June-July 2020.

**Setting:** 55 schools stratified by district in the canton of Zurich, Switzerland.

**Participants:** 2585 children (1339 girls, median age 11, age range 6-16 years), attending grades 1-2, 4-5 and 7-8.

**Main outcome measures:** Variation in seroprevalence of SARS-CoV-2 in children across 12 cantonal districts, schools, and grades, assessed with Luminex-based test of four epitopes for each of IgG, IgA and IgM. Clustering of cases within classes. Association of seropositivity and symptoms. Comparison with seroprevalence in adult population, assessed with Luminex-based test of combining IgG and IgA.

**Results:** Overall seroprevalence was 2.8 % (95% CI 1.5 to 4.1%), ranging from 1.0% to 4.5% across districts. Seroprevalence in grades 1-2 was 3.8% (2.0 to 6.1%), in grades 4-5 – 2.4% (1.1 to 4.2%), and in grades 7-8 – 1.5% (0.5 to 3.0%). At least one seropositive child was present in 36 of 55 (65%) schools and in 44 (34%) of 131 classes where  $\geq 5$  children and  $\geq 50\%$  of children within the class were tested. 73% of children reported COVID-19-compatible symptoms since January 2020, with the same frequency in seropositive and seronegative children for all symptoms. Seroprevalence of children and adults was similar (3.2%, 95% CrI 1.7-5.0%, versus 3.6%, 95% CrI 1.7-5.4%). The ratio of confirmed cumulative incidence to seropositive cases was 1:89 in children and 1:12 in adults.

**Conclusions:** Seroprevalence was inversely related to age and revealed a ratio of diagnosed to seropositive cases of around one to 90 in children by the end of June. We did not detect clustering of SARS-CoV-2 seropositive children, but the follow-up of this study will shed more light on transmission within schools.

**Trial registration:** ClinicalTrials.gov NCT04448717.  
<https://clinicaltrials.gov/ct2/show/NCT04448717>

**Key words:** SARS-CoV-2, COVID-19, children, adolescents, school.

90

91 **Article summary**

92

93 **Strengths and limitations of this study**

- 94
- 95 • This study presents the results of a regionally representative cohort of children,  
96 randomized on school and class levels, and thus, allowing the analysis of clustering of  
97 cases within schools.
  - 98 • This cross-sectional analysis estimates the seroprevalence in children in June-July in  
99 Switzerland, from a period when there is very little evidence about SARS-CoV-2  
100 seroprevalence in children globally.
  - 101 • Serological test with high sensitivity and specificity was used, and Bayesian  
102 hierarchical models were additionally applied to estimate seroprevalence, adjusting  
103 for test accuracy parameters.
  - 104 • Self-reported symptoms might be subject to recall-bias, particularly when reporting  
105 retrospectively for a period of over six months.
- 106



**107 INTRODUCTION**

108 The transmission of severe acute respiratory syndrome coronavirus 2 (SARS-CoV-2) in the  
109 school setting is not well understood [1], partly as schools were closed in many countries  
110 during the peaks of the pandemic, partly due to lack of representative studies with random  
111 sampling. Anecdotal evidence and case studies suggest that outbreaks can happen in  
112 schools [2–4], but it is not clear if they represent outlier events or widely underdiagnosed  
113 spread of the infection. School closures are even predicted to increase the total number of  
114 deaths by some modelling studies [5]. Currently existing or planned population-based  
115 studies focusing on SARS-CoV-2 spread in schools are few and small-sized [6,7].

116 In this study, we present the results of the first cross-sectional analysis of a large  
117 cohort of children from randomly selected schools and classes in the canton of Zurich,  
118 Switzerland. The participating children were enrolled from June 16 to July 9, 2020. Schools  
119 in Switzerland were closed for a relatively short period (March 16 to May 10) compared to  
120 other countries, and lock-down measures were mild. The cohort study follows the  
121 seroprevalence, symptoms, socio-demographic and lifestyle factors of enrolled children  
122 from June 2020 to April 2021.

123 The aim of this analysis is to present the overall estimate of seroprevalence and its  
124 variation across districts, schools, grades and classes, and the association of seroprevalence  
125 with self-reported symptoms.

126  
127

**128 METHODS**

129 The study was registered on ClinicalTrials.gov (identifier number NCT04448717). The  
130 protocol for this longitudinal cohort study was reported elsewhere [8]. The study is part of a  
131 large nationally coordinated research network *Corona Immunitas* in Switzerland [9,10].  
132 The study took place from June 16 to July 9, 2020, in the canton of Zurich, Switzerland. The  
133 canton of Zurich comprises 1.5 million residents, roughly 18% of the Swiss population, and  
134 includes both urban and rural settings, as well as an ethnically and linguistically diverse  
135 population. The first preventive measures in schools were introduced on March 16, 2020,  
136 when physical attendance of schools was stopped. Schools were partly reopened on May  
137 10, with a combination of online and on-site teaching with preventive measures (e.g.,  
138 teaching in smaller groups, school attendance every second day, sports and large group  
139 activities limited). Schools were fully reopened on June 7, with minimal preventive measures  
140 (e.g., recommended social distancing for teachers, reduction of group events) and otherwise  
141 regular operation (e.g., full classrooms with desks mostly facing forward) until the end of the  
142 school year on July 17. The prevention measures implemented in schools after May 10 were  
143 school-specific and based on the federal and cantonal guidelines [11].

144 School were selected based on a full list of schools provided by the Educational  
145 Department of the canton. Primary schools were randomly selected by a computer program  
146 from the list of all primary schools in the respective district. The closest secondary school  
147 (often in the same building or area) was then selected. The random sample of primary and  
148 secondary schools was stratified by geographic district. Within schools, randomly selected  
149 classes in lower school level (grades one to two, attended by 6 to 9-year-old children),  
150 middle (grades four to five, 9 to 13-year-old children), and upper school level (grades seven  
151 to eight, 12 to 16-year-old children) were invited. Invited grades and classes were selected  
152 to ensure that the same cohort of children within the class can be followed until April 2021.  
153 Therefore, grades 1-2, 4-5 and 7-8 (but not grades 3, 6, and 9) were included, as they  
154 normally stay in the same school and class for the next school-year. We aimed to enroll at  
155 least three classes and 40 children per school level. Major exclusion criterion for the invited  
156 children was a suspected or confirmed infection with SARS-CoV-2 in the given child during  
157 the testing at schools.

158 Study information, link to study website ([www.ciao-corona.ch](http://www.ciao-corona.ch)), and informational  
159 videos in multiple languages for schools, parents, and children were sent to school principals  
160 and further to families of children from the selected classes. Children were enrolled and  
161 venous blood samples taken in schools between June 16 and July 9, 2020. Questionnaires

162 with information on socio-demographics and symptoms compatible with SARS-CoV-2  
163 infection from January to June, 2020, were completed online for the majority of children by  
164 their parents in June-July, 2020 (for 3% of children in August-September).

165 In total, 55 out of 156 invited primary and secondary schools agreed to participate, and  
166 2585 children in 273 out of 274 invited classes (no children participated in one class).

167 Venous blood samples were collected from 2484 children (a sufficient amount of blood  
168 could not be obtained from 101 children). An online questionnaire, containing socio-  
169 demographic, health, symptoms and quality of life information for the children, and socio-  
170 demographic and symptoms information for the household members, was completed for  
171 2288 of all enrolled children. Questionnaires were not filled for 297 children, after several  
172 email and phone call reminders.

173 Blood samples were analyzed with ABCORA 2.0 binding assay of the Institute of  
174 Medical Virology (IMV) of the University of Zurich based on the Luminex technology. The  
175 test analyzes immunoglobulins G (IgG), M (IgM) and A (IgA) against four SARS-CoV-2 targets  
176 (receptor binding domain (RBD), spike proteins S1 and S2, and the nucleocapsid protein (N),  
177 yielding 12 different measurements. Cut-off values were established against pre-pandemic  
178 plasma allowing a high sensitivity (93.3%) and specificity (99.6%). Samples were defined as  
179 seropositive for SARS-CoV-2 if at least two of the 12 parameters were above the cut-off.  
180 SARS-CoV-2 seroprevalence in children was compared to that estimated in a random sample  
181 from the general population, adjusting for age group and sex, in the same region in June-  
182 July 2020. The adult study, like all studies of the Swiss-wide research program *Corona*  
183 *Immunitas* [9,10], used the test SenASTrIS (Sensitive Anti-SARS-CoV-2 Spike Trimer  
184 Immunoglobulin Serological) developed by the Centre Hospitalier Universitaire Vaudois  
185 (CHUV), the Swiss Federal Institute of Technology in Lausanne (EPFL) and the Swiss Vaccine  
186 Center [12]. The test also uses Luminex technology to detect IgG and IgA antibodies binding  
187 to the entire trimeric S protein of SARS-CoV-2 and with demonstrated 98.3% sensitivity and  
188 98.4% specificity for the combined testing of IgG and IgA (result declared as positive when  
189 either or both were positive) [12]. In order to compare the seroprevalence estimates in  
190 children and adult cohorts, a sample of 2476 collected children blood samples was also  
191 analyzed with the SenASTrIS test (samples were insufficient for analysis with the second test  
192 for 8 children) and compared to a random population sample of 857 adults who took part in  
193 the second phase of the Switzerland-wide *Corona Immunitas* research program [10].

194 Seroprevalence was also compared to the cumulative incidence of reverse  
195 transcription polymerase chain reaction (RT-PCR)-confirmed SARS-CoV-2 infections in adults

1 196 and children, based on official statistics up to the beginning of June [13]. Statistical analysis  
2 197 included descriptive statistics and Bayesian hierarchical modelling to estimate  
3  
4 198 seroprevalence, accounting for the sensitivity and specificity of the SARS-CoV-2 antibody  
5  
6 199 test, the hierarchical structure of cohort (individual and school levels), and post-  
7  
8 200 stratification weights, which adjusted for the population-level grade level and geographic  
9  
10 201 district [14]. The factor of confirmed to total infections (dark figure) was calculated as the  
11  
12 202 ratio of RT-PCR-confirmed cumulative incidence by the end of June 2020 and the estimated  
13  
14 203 seroprevalence.  
15

204

### 205 **Patient and public involvement**

18 206 Several school principals were consulted during the development of the protocol to ensure  
19  
20 207 feasibility of the planned study procedures. Early feedback was collected from invited  
21  
22 208 children and parents, in order to adapt the communication strategies and channels.  
23  
24 209 Numerous online informational sessions, encouraging open exchange and feedback, were  
25  
26 210 organized for invited and enrolled school principals, personnel and parents of the children.  
27  
28 211 Results of individual tests were communicated to the participants, and overall study results  
29  
30 212 disseminated to participating schools. Findings will be disseminated in lay language in the  
31  
32 213 national and local press, to the national and regional educational and public health  
33  
34 214 departments and on the website of the study ([www.ciao-corona.ch](http://www.ciao-corona.ch)).  
35

215

**216 RESULTS**

217 In total, 55 schools and 2585 children were recruited (1339 (52%) girls, median age 11, age  
218 range 6-16 years), 754 (29%) in the lower level, 899 (35%) in the middle, and 932 (36%) in  
219 the upper school level. Mean participation rate was 50% of the invited children within  
220 invited classes (range from 0% to 94% (0 to 21 children), interquartile range 32% to 63%).  
221 Venous blood was collected and analyzed for 2484 children (1278 (51%) girls, median age  
222 11, age range 6 to 16 years).

223 74 children had SARS-CoV-2 antibodies, resulting in overall weighted seroprevalence  
224 of 2.8 % (95% credible interval (CrI) 1.5 to 4.1%), ranging from 1.0% to 4.5% in districts  
225 (Figure 1). Seroprevalence was 3.8% (95% CrI 2.0 to 6.1%) in grades one to two, 2.4% (95%  
226 CrI 1.1 to 4.2%) in grades four to five, and 1.5% (95% CrI 0.5 to 3.0%) in grades seven to  
227 eight (Figure 1).

228 Seroprevalence of children, as measured with the SenASTrIS test of IgG and IgA  
229 combined, was very similar to the seroprevalence of randomly selected adults in the same  
230 region in June-July 2020 (3.2%, 95% CrI 1.7 to 5.0%, versus 3.6%, 95% CrI 1.7 to 5.4%). The  
231 estimates of seroprevalence in the children cohort, as measured with the SenASTrIS test, in  
232 different school levels and districts were similar to those estimated with the primary  
233 ABCORA 2.0 test (Figure 1).

234 Based on the cumulative incidence of SARS-CoV-2 RT-PCR-confirmed cases by the  
235 end of June (0.03% for children and 0.24% for adult populations), the ratio of confirmed  
236 infections and seropositive cases (dark figure) in children was one to 89, compared to a ratio  
237 of one to 12 in the adult Swiss population.

239 **Figure 1** Overall, school level and district estimates of SARS-CoV-2 seroprevalence in  
240 children

241 Weighted point estimates and 95% credible intervals are shown. Districts are ordered by population size.  
242 ABCORA 2.0 – Primary estimate based on the ABCORA 2.0 of the Institute of Medical Virology, University  
243 of Zurich test.

244 SenASTrIS – Estimate based on the SenASTrIS test.

246 At least one seropositive child was present in 36/55 (65%) of tested schools. Within the  
247 levels of the schools, at least one seropositive child was present in the lower level of 17  
248 (59%) out of 29 tested schools, in the middle level of 14 (50%) out of 28 tested schools, and  
249 in the upper level of 16 (64%) out of 25 tested schools (Figure 2).

250 At least one seropositive child was present in 34% (44/131) of classes where  $\geq 5$   
251 children and  $\geq 50\%$  of children within the class were tested (Figure 3). Among the classes

1 252 with at least one seropositive child, 38 (86%) had only one, 4 (9%) had two and 2 (5%) had  
2 253 three seropositive children. When considering all classes regardless of participation rate,  
3  
4 254 24% of classes had at least one seropositive child; whereas when considering higher  
5  
6 255 inclusion threshold of  $\geq 15$  children and  $\geq 60\%$  of the class tested, 45% of classes had at least  
7  
8 256 one seropositive child.

9 257

10  
11 258 **Figure 2** Seropositive children in tested schools and school levels

12  
13 259 Each square illustrates an invited child. Each block of squares illustrates a school level in a school. Lower  
14 260 and middle levels are both taught in the primary schools; however, lower and middle levels of the same  
15 261 school are not matched in this graph due to protection of participant privacy. The distribution of the  
16 262 invited, tested and seropositive children is depicted only on the school level in the figures of this  
17 263 manuscript to preserve deidentification and privacy of the participants.

18 264

19 265 **Figure 3** Clustering of seropositive children in classes: number and proportion of

20 266 seropositive children in the tested classes

21  
22 267 Only classes where at least 5 children and at least 50% of the class were tested are shown. The  
23 268 distribution of seropositive children in the enrolled classes is only presented in an aggregated form to  
24 269 preserve the deidentification and privacy of the participants.

25 270

26 271 No sex differences in seroprevalence were noted (2.8% (95% CrI 1.6 to 4.1%) in girls and  
27 272 2.7% (95% CrI 1.5 to 4.0%) in boys). 73% of children reported any SARS-CoV-2 compatible  
28 273 symptoms, such as cough, fever, fatigue or diarrhea (see Figure 4 for the full list), between  
29 274 January and June 2020. None of the symptoms was more frequent in seropositive than in  
30 275 seronegative children (Figure 4).

31 276

32 277 **Figure 4** Self-reported symptoms in seropositive and seronegative children in January-June  
33 278 2020

34 279 Point estimates and 95% confidence intervals are shown.

35 280

**282 DISCUSSION**

1  
2 283 In this study of randomly sampled schools and classes by July 2020, we found variation in  
3  
4 284 seroprevalence in 6 to 16-year-old children across districts, schools and classes, but no  
5  
6 285 indication of major transmission and outbreaks within schools. The overall seroprevalence  
7  
8 286 was not different from a randomly selected adult population living in the same region –  
9  
10 287 pointing to striking underdiagnosis of SARS-CoV-2 infection in children, with only one in 89  
11  
12 288 cases diagnosed. Such a high proportion of seropositive cases not previously diagnosed with  
13  
14 289 RT-PCR is likely explained by our observation that symptoms do not seem to be suggestive  
15  
16 290 of a SARS-CoV-2 infection in children, contrary to more specific symptoms in adults [15], and  
17  
18 291 by cautious testing indications by health authorities, with similar indications for children and  
19  
20 292 adults during the first half of 2020. Contrary to studies of symptomatic infections [16] and  
21  
22 293 some other population-based studies of seroprevalence [17], there was a trend of higher  
23  
24 294 seroprevalence in younger children. Although no outbreaks were reported in schools at the  
25  
26 295 time of testing in the canton of Zurich (comprising 18% of the Swiss population),  
27  
28 296 seropositive children were detected in more than half of the tested schools and a third of all  
29  
30 297 tested classes. However, the vast majority of classes with seropositive children had only a  
31  
32 298 single seropositive child among the tested children, reflecting low prevalence and no  
33  
34 299 significant clustering within classes after the re-opening of the schools. The presence of  
35  
36 300 symptoms was very common (three of four children reported one or several symptoms  
37  
38 301 compatible with a COVID-19 infection) and importantly not specific to the seropositive  
39  
40 302 children.

41  
42 303 Currently, there are few studies focusing on SARS-CoV-2 spread in schools [17–19].  
43  
44 304 Most of the reported evidence consists of cases studies of outbreaks in specific schools or  
45  
46 305 reports of contact tracing of index cases in educational settings. Mostly low secondary  
47  
48 306 attack rates in schools are reported [4,20], but there are also conflicting observations of  
49  
50 307 outbreaks [2,21]. Although some studies of seroprevalence have included children  
51  
52 308 [14,22,23], they mostly focused on households and the general population. The  
53  
54 309 management of SARS-CoV-2 transmission in schools is therefore highly debated [24,25]. The  
55  
56 310 present study is thus unique as one of the first major studies reporting variation in  
57  
58 311 seroprevalence in children from randomly selected schools in a country where the general  
59  
60 312 lock-down on a population level was mild and short (one month), and school closure lasted  
313 only for two months.

314 Although manifest clinical disease of COVID-19 is much less prevalent in children  
315 than in adults [16,26] and preliminary evidence points to lower susceptibility of children



1 316 compared to adults [17], our results indicate very similar seroprevalence in adults and  
2 317 children. Intriguingly, we observed a not statistically significant trend of younger children  
3  
4 318 having higher seroprevalence than older children, when measured with the comprehensive  
5  
6 319 ABCORA 2.0 test. Infections with circulating human coronaviruses (hCoVs) are common in  
7  
8 320 childhood and antibodies to hCoVs 229E, NL63, OC43 and HKU1A are prevalent in the  
9  
10 321 human population and particularly children [27,28]. Cross-reactivity with hCoVs was thus  
11  
12 322 considered in the development of both serology tests used in this study and both tests  
13  
14 323 detect SARS-CoV-2 with high specificity (99.6% for ABCORA 2.0 and 98.4% for SenASTriS).  
15  
16 324 Importantly, to adjust for the possibility of a few false-positive results, we employed a  
17  
18 325 Bayesian hierarchical model, which adjusts for the accuracy parameters of the tests to  
19  
20 326 estimate population-level seroprevalence. Higher seroprevalence in younger children could  
21  
22 327 be related to virtually impossible social distancing behaviour, but also to a possibly more  
23  
24 328 vigorous immune response to the virus in early age that will be interesting to explore in  
25  
26 329 forthcoming studies.

27 330 The frequency of both more specific (e.g., fever, cough) and less specific (rhinorrhea,  
28 331 headache, nausea) symptoms [29] was not different among seropositive and seronegative  
29 332 children. In general, symptoms, particularly rhinorrhea, cough, headache and sore throat,  
30 333 were reported frequently, with three of four children reporting any symptoms within the  
31 334 last 6 months in both groups. The specificity of COVID-19 compatible symptoms, therefore,  
32  
33 335 seems to be lower in children than in adults. Moreover, the range of symptoms reported in  
34  
35 336 children has shown to be different compared to adults [30].

36  
37 337 Particular strengths of the design of this study are school-based random sampling,  
38  
39 338 hierarchical data structure, and large sample size, allowing to identify clusters within  
40  
41 339 district, school, grade and class levels. Testing was done in schools and study information  
42  
43 340 presented in multiple formats, including videos in multiple languages, to minimize selection  
44  
45 341 bias within enrolled children. The participation rate of 50% can be considered rather high  
46  
47 342 for a study in children involving venous blood sampling, and additional children from the  
48  
49 343 invited classes will have the opportunity to be enrolled in subsequent testing phases  
50  
51 344 (October/November 2020, March/April 2021), further increasing participation rate and the  
52  
53 345 size of the cohort.

54  
55 346 The study has a few limitations. First, the retrospective evaluation of symptoms over  
56  
57 347 six months could have been subject to recall bias. Second, the study enrolled only 35%  
58  
59 348 (55/156) of the invited schools. Commonly stated reasons for non-participation on school  
60  
349 level were constraints in time and human resources and competing participation in other



1 350 studies. Participation rate varied significantly depending on the district, and for a few  
2 351 districts, the schools had to be invited with a maximum of three invitation rounds to have a  
3  
4 352 regionally representative sample. Third, although the schools were open for one to two  
5  
6 353 months directly before the study, they were closed for the two months of the highest  
7  
8 354 community transmission of SARS-CoV-2 in the canton of Zurich [13]. Therefore, the  
9  
10 355 measured seroprevalence in children might be dominated by infections in households rather  
11  
12 356 than school. The follow up of this study will shed more light on transmission in schools.

13 357 In conclusion, clustering of SARS-CoV-2 seropositive children within schools and  
14  
15 358 grades was not prominent shortly after reopening of schools in this large population-based  
16  
17 359 study. Seroprevalence was similar to adults and higher in lower grade compared to higher  
18  
19 360 grade children, resulting in a strikingly higher ratio of diagnosed to seropositive cases than  
20  
21 361 in adults, in particular in the very young children. Considering the time window required for  
22  
23 362 SARS-CoV-2 antibodies to form, this study reflects infection of SARS-CoV-2 until  
24  
25 363 approximately end of May 2020, covering four months of SARS-CoV-2 infection in the  
26  
27 364 community, with two months of school closure and mild lock-down policy. The subsequent  
28  
29 365 testing of parents and school personnel and the follow-up of the children cohort in fall 2020  
30  
31 366 will yield further evidence of the spread of SARS-CoV-2 within and outside schools.

32 367  
33  
34  
35  
36  
37  
38  
39  
40  
41  
42  
43  
44  
45  
46  
47  
48  
49  
50  
51  
52  
53  
54  
55  
56  
57  
58  
59  
60

**368 Author Contributions**

1  
2 369 SK and MAP initiated the project and preliminary design, with support of JF. SK, MAP, CB,  
3  
4 370 TR, RJ, JB, AF and AU developed the design and methodology. SK, RJ, AU, TR, JB, AF and CC  
5  
6 371 recruited study participants, collected and managed the data. SRH performed statistical  
7  
8 372 analysis. AT, MH, MaSch, MeSch and IA developed the serology analysis plan, supervised,  
9  
10 373 conducted and evaluated the serology tests. AU wrote the first draft of the manuscript. All  
11  
12 374 authors contributed to the design of the study and interpretation of its results, and revised  
13  
14 375 and approved the manuscript for intellectual content. SK is the guarantor and accepts full  
15  
16 376 responsibility for the work and the conduct of the study, had access to the data, and  
17  
18 377 controlled the decision to publish. The corresponding author SK attests that all listed  
19  
20 378 authors meet authorship criteria and that no others meeting the criteria have been omitted.  
21  
22 379

**380 Competing interests**

23  
24 381 The authors declare no competing interests to disclose.  
25  
26 382

**383 Funding**

27  
28 384 This study is part of *Corona Immunitas* research network, coordinated by the Swiss School of  
29  
30 385 Public Health (SSPH+), and funded by fundraising of SSPH+ that includes funds of the Swiss  
31  
32 386 Federal Office of Public Health and private funders (ethical guidelines for funding stated by  
33  
34 387 SSPH+ will be respected), by funds of the Cantons of Switzerland (Vaud, Zurich and Basel)  
35  
36 388 and by institutional funds of the Universities. Additional funding, specific to this study is  
37  
38 389 available from the University of Zurich Foundation. The funder/sponsor did not have any  
39  
40 390 role in the design and conduct of the study; collection, management, analysis, and  
41  
42 391 interpretation of the data; preparation, review, or approval of the manuscript; and decision  
43  
44 392 to submit the manuscript for publication. All authors had full access to all data analysis  
45  
46 393 outputs (reports and tables) and take responsibility for their integrity and accuracy  
47  
48 394

**395 Data sharing statement**

49  
50 396 Data is still being collected for the cohort study *Ciao Corona*. Deidentified participant data  
51  
52 397 might be available on reasonable request by email to the corresponding author at later  
53  
54 398 stages of the study.  
55  
56 399

**400 Ethics approval**

1 401 The study was approved by the Ethics Committee of the Canton of Zurich, Switzerland  
2 402 (2020-01336). All participants provided written informed consent before being enrolled in  
3  
4 403 the study.

5 404

#### 7 405 **Transparency declaration**

9 406 The lead authors affirm that the manuscript is an honest, accurate, and transparent account  
10  
11 407 of the study being reported, no important aspects of the study have been omitted, and any  
12  
13 408 discrepancies from the study as originally planned and registered have been explained.

14 409

#### 16 410 **References**

- 17  
18 411 1 Viner RM, Russell SJ, Croker H, *et al.* School closure and management practices during  
19  
20 412 coronavirus outbreaks including COVID-19: a rapid systematic review. *Lancet Child*  
21  
22 413 *Adolesc. Heal.* 2020;**4**:397–404. doi:10.1016/S2352-4642(20)30095-X
- 23 414 2 Stein-Zamir C, Abramson N, Shoob H, *et al.* A large COVID-19 outbreak in a high  
24  
25 415 school 10 days after schools' reopening, Israel, May 2020. *Eurosurveillance*  
26  
27 416 2020;**25**:2001352. doi:10.2807/1560-7917.ES.2020.25.29.2001352
- 28  
29 417 3 Lopez AS, Hill M, Antezano J, *et al.* Transmission Dynamics of COVID-19 Outbreaks  
30  
31 418 Associated with Child Care Facilities — Salt Lake City, Utah, April–July 2020. *MMWR*  
32  
33 419 *Morb Mortal Wkly Rep* 2020;**69**:1319–23. doi:10.15585/mmwr.mm6937e3
- 34 420 4 Macartney K, Quinn HE, Pillsbury AJ, *et al.* Transmission of SARS-CoV-2 in Australian  
35  
36 421 educational settings: a prospective cohort study. *Lancet Child Adolesc Heal* 2020;**0**.  
37  
38 422 doi:10.1016/s2352-4642(20)30251-0
- 39  
40 423 5 Rice K, Wynne B, Martin V, *et al.* Effect of school closures on mortality from  
41  
42 424 coronavirus disease 2019: old and new predictions. *BMJ* 2020;**371**:m3588.  
43  
44 425 doi:10.1136/bmj.m3588
- 45 426 6 Ladhani S, Ramsay M, Amirthalingam G, *et al.* COVID-19 Surveillance in Children  
46  
47 427 attending preschool, primary and secondary schools. 2020.  
48  
49 428 [https://assets.publishing.service.gov.uk/government/uploads/system/uploads/attach](https://assets.publishing.service.gov.uk/government/uploads/system/uploads/attachment_data/file/891762/sKID_protocol_v1.3.pdf)  
50  
51 429 [ment\\_data/file/891762/sKID\\_protocol\\_v1.3.pdf](https://assets.publishing.service.gov.uk/government/uploads/system/uploads/attachment_data/file/891762/sKID_protocol_v1.3.pdf)
- 52  
53 430 7 Armann JP, Unrath M, Kirsten C, *et al.* Anti-SARS-CoV-2 IgG antibodies in adolescent  
54  
55 431 students and their teachers in Saxony, Germany (SchoolCoviDD19): very low  
56  
57 432 seroprevalence and transmission rates. *medRxiv* 2020;:2020.07.16.20155143.  
58  
59 433 doi:10.1101/2020.07.16.20155143
- 60 434 8 Ulyte A, Radtke T, Abela IA, *et al.* Seroprevalence and immunity of SARS-CoV-2  
435  
infection in children and adolescents in schools in Switzerland: design for a

- 1 436 longitudinal, school-based prospective cohort study. *Int J Public Health* Published  
2 437 Online First: 15 October 2020. doi:10.1007/s00038-020-01495-z  
3  
4 438 9 Corona Immunitas: a nationwide program of antibody studies of SARS-CoV-2 in the  
5  
6 439 Swiss population (ISRCTN18181860). <http://www.isrctn.com/ISRCTN18181860>  
7  
8 440 (accessed 28 Aug 2020).  
9  
10 441 10 West EA, Anker D, Amati R, *et al.* Corona Immunitas: study protocol of a nationwide  
11 442 program of SARS-CoV-2 seroprevalence and seroepidemiologic studies in Switzerland.  
12  
13 443 *Int J Public Health* 2020;:1–20. doi:10.1007/s00038-020-01494-0  
14  
15 444 11 Information for public schools. Preventive regulations | Canton of Zurich.  
16  
17 445 [https://www.zh.ch/de/gesundheit/coronavirus/informationen-rund-um-schulen-](https://www.zh.ch/de/gesundheit/coronavirus/informationen-rund-um-schulen-kitas-heime/coronavirus-volksschule.html#-1212670983)  
18 446 [kitas-heime/coronavirus-volksschule.html#-1212670983](https://www.zh.ch/de/gesundheit/coronavirus/informationen-rund-um-schulen-kitas-heime/coronavirus-volksschule.html#-1212670983) (accessed 13 Nov 2020).  
19  
20 447 12 Fenwick C, Croxatto A, Coste AT, *et al.* Changes in SARS-CoV-2 Spike versus  
21  
22 448 Nucleoprotein Antibody Responses Impact the Estimates of Infections in Population-  
23  
24 449 Based Seroprevalence Studies. *J Virol* Published Online First: 2020.  
25  
26 450 doi:10.1128/JVI.01828-20  
27  
28 451 13 Canton of Zurich. Numbers and Facts on COVID-19 [Kanton Zürich. Zahlen & Fakten zu  
29  
30 452 COVID-19]. [https://www.zh.ch/de/gesundheit/coronavirus/zahlen-fakten-covid-](https://www.zh.ch/de/gesundheit/coronavirus/zahlen-fakten-covid-19.html?keyword=covid19#/home)  
31 453 [19.html?keyword=covid19#/home](https://www.zh.ch/de/gesundheit/coronavirus/zahlen-fakten-covid-19.html?keyword=covid19#/home) (accessed 13 Nov 2020).  
32  
33 454 14 Stringhini S, Wisniak A, Piumatti G, *et al.* Seroprevalence of anti-SARS-CoV-2 IgG  
34  
35 455 antibodies in Geneva, Switzerland (SEROCoV-POP): a population-based study. *Lancet*  
36  
37 456 2020;0. doi:10.1016/S0140-6736(20)31304-0  
38  
39 457 15 Struyf T, Deeks JJ, Dinnes J, *et al.* Signs and symptoms to determine if a patient  
40  
41 458 presenting in primary care or hospital outpatient settings has COVID-19 disease.  
42  
43 459 *Cochrane Database Syst. Rev.* 2020;2020. doi:10.1002/14651858.CD013665  
44  
45 460 16 de Lusignan S, Dorward J, Correa A, *et al.* Risk factors for SARS-CoV-2 among patients  
46  
47 461 in the Oxford Royal College of General Practitioners Research and Surveillance Centre  
48  
49 462 primary care network: a cross-sectional study. *Lancet Infect Dis* 2020;20:1034–42.  
50 463 doi:10.1016/S1473-3099(20)30371-6  
51  
52 464 17 Viner RM, Mytton OT, Bonell C, *et al.* Susceptibility to SARS-CoV-2 Infection Among  
53  
54 465 Children and Adolescents Compared With Adults. *JAMA Pediatr* Published Online  
55 466 First: 25 September 2020. doi:10.1001/jamapediatrics.2020.4573  
56  
57 467 18 Xu W, Li X, Dozier M, *et al.* What is the evidence for transmission of COVID-19 by  
58  
59 468 children in schools? A living systematic review. *medRxiv* Published Online First: 2020.  
60 469 doi:10.1101/2020.10.11.20210658

- 1 470 19 Munro APS, Faust SN. COVID-19 in children. *Curr Opin Infect Dis* Published Online  
2 471 First: 6 October 2020. doi:10.1097/QCO.0000000000000690  
3
- 4 472 20 Heavey L, Casey G, Kelly C, *et al.* No evidence of secondary transmission of COVID-19  
5 473 from children attending school in Ireland, 2020. *Eurosurveillance* 2020;**25**:2000903.  
6 474 doi:10.2807/1560-7917.ES.2020.25.21.2000903  
7
- 8 475 21 Szablewski CM, Chang KT, Brown MM, *et al.* SARS-CoV-2 Transmission and Infection  
9 476 Among Attendees of an Overnight Camp — Georgia, June 2020. *MMWR Morb Mortal*  
10 477 *Wkly Rep* 2020;**69**:1023–5. doi:10.15585/mmwr.mm6931e1  
11
- 12 478 22 Pollán M, Pérez-Gómez B, Pastor-Barriuso R, *et al.* Prevalence of SARS-CoV-2 in Spain  
13 479 (ENE-COVID): a nationwide, population-based seroepidemiological study. *Lancet*  
14 480 (*London, England*) 2020;**0**. doi:10.1016/S0140-6736(20)31483-5  
15
- 16 481 23 Waterfield T, Watson C, Moore R, *et al.* Seroprevalence of SARS-CoV-2 antibodies in  
17 482 children - A prospective multicentre cohort study. *medRxiv*  
18 483 2020;:2020.08.31.20183095. doi:10.1101/2020.08.31.20183095  
19
- 20 484 24 Esposito S, Principi N. School Closure during the Coronavirus Disease 2019 (COVID-19)  
21 485 Pandemic: An Effective Intervention at the Global Level? *JAMA Pediatr.* 2020.  
22 486 doi:10.1001/jamapediatrics.2020.1892  
23
- 24 487 25 Christakis DA. School Reopening-The Pandemic Issue That Is Not Getting Its Due.  
25 488 *JAMA Pediatr.* 2020. doi:10.1001/jamapediatrics.2020.2068  
26
- 27 489 26 Götzinger F, Santiago-García B, Noguera-Julían A, *et al.* COVID-19 in children and  
28 490 adolescents in Europe: a multinational, multicentre cohort study. *Lancet Child Adolesc*  
29 491 *Heal* 2020;**4**:653–61. doi:10.1016/S2352-4642(20)30177-2  
30
- 31 492 27 Zhou W, Wang W, Wang H, *et al.* First infection by all four non-severe acute  
32 493 respiratory syndrome human coronaviruses takes place during childhood. *BMC Infect*  
33 494 *Dis* 2013;**13**:433. doi:10.1186/1471-2334-13-433  
34
- 35 495 28 Ng KW, Faulkner N, Cornish GH, *et al.* Preexisting and de novo humoral immunity to  
36 496 SARS-CoV-2 in humans. *Science (80- )* 2020;:eabe1107. doi:10.1126/science.abe1107  
37
- 38 497 29 Viner R, Ward J, Hudson L, *et al.* Systematic review of reviews of symptoms and signs  
39 498 of COVID-19 in children and adolescents. *medRxiv* 2020;:2020.10.16.20213298.  
40 499 doi:10.1101/2020.10.16.20213298  
41
- 42 500 30 Mayor S. Covid-19: UK studies find gastrointestinal symptoms are common in  
43 501 children. doi:10.1101/2020.08.31.20183095v1  
44 502  
45 503

1  
2  
3  
4  
5  
6  
7  
8  
9  
10  
11  
12  
13  
14  
15  
16  
17  
18  
19  
20  
21  
22  
23  
24  
25  
26  
27  
28  
29  
30  
31  
32  
33  
34  
35  
36  
37  
38  
39  
40  
41  
42  
43  
44  
45  
46  
47  
48  
49  
50  
51  
52  
53  
54  
55  
56  
57  
58  
59  
60

## 504 Figure legends

505

506 **Figure 1** Overall, school level and district estimates of SARS-CoV-2 seroprevalence in  
507 children

508 Weighted point estimates and 95% credible intervals are shown. Districts are ordered by  
509 population size.

510 ABCORA 2.0 – Primary estimate based on the ABCORA 2.0 of the Institute of Medical  
511 Virology, University of Zurich test. SenASTrIS – Estimate based on the SenASTrIS test.

512

513 **Figure 2** Seropositive children in tested schools and school levels

514 Each square illustrates an invited child. Each block of squares illustrates a school level in a  
515 school. Lower and middle levels are both taught in the primary schools; however, lower and  
516 middle levels of the same school are not matched in this graph due to protection of  
517 participant privacy. The distribution of the invited, tested and seropositive children is  
518 depicted only on the school level in the figures of this manuscript to preserve  
519 deidentification and privacy of the participants.

520

521 **Figure 3** Clustering of seropositive children in classes: number and proportion of  
522 seropositive children in the tested classes

523 Only classes where at least 5 children and at least 50% of the class were tested are shown.  
524 The distribution of seropositive children in the enrolled classes is only presented in an  
525 aggregated form to preserve the deidentification and privacy of the participants.

526

527 **Figure 4** Self-reported symptoms in seropositive and seronegative children in January-June  
528 2020

529 Point estimates and 95% confidence intervals are shown.

530

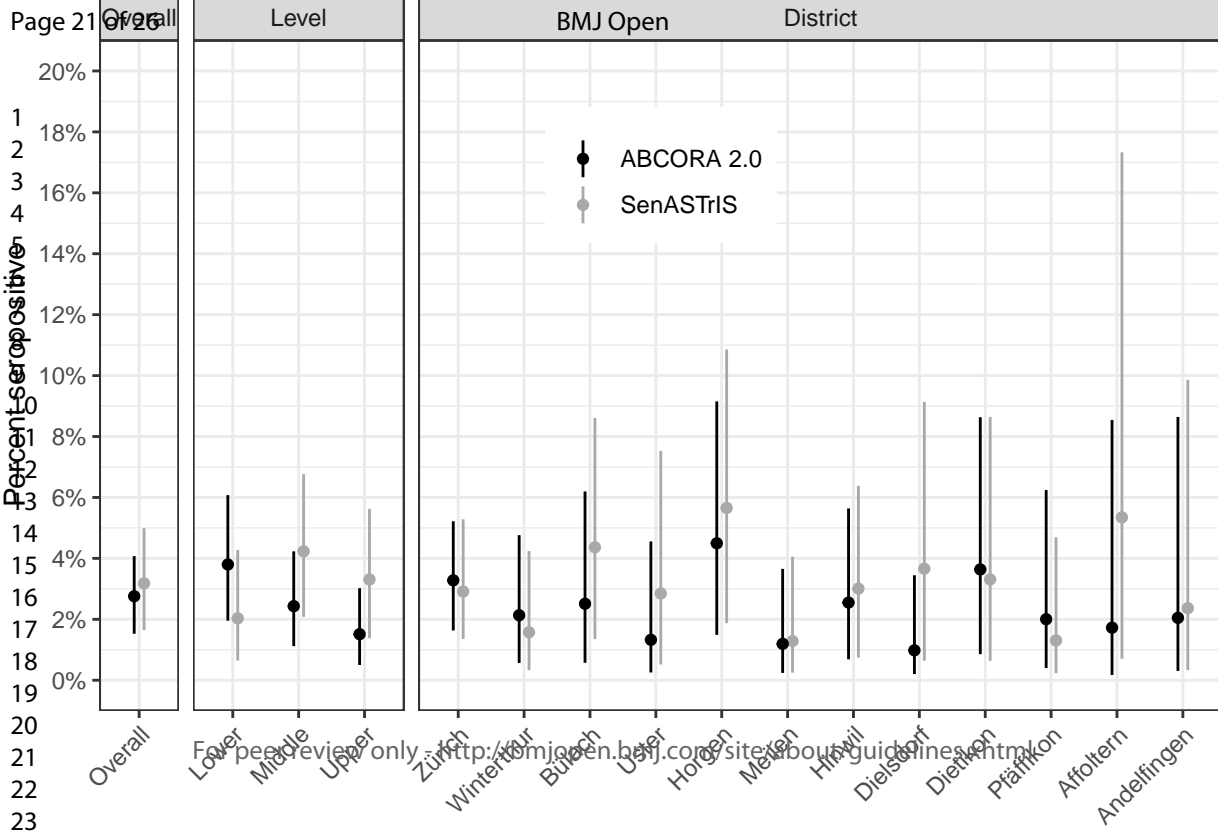

1  
2  
3  
4  
5  
6  
7  
8  
9  
10  
11  
12  
13  
14  
15  
16  
17  
18  
19  
20  
21  
22  
23

Lower level

BMJ Open

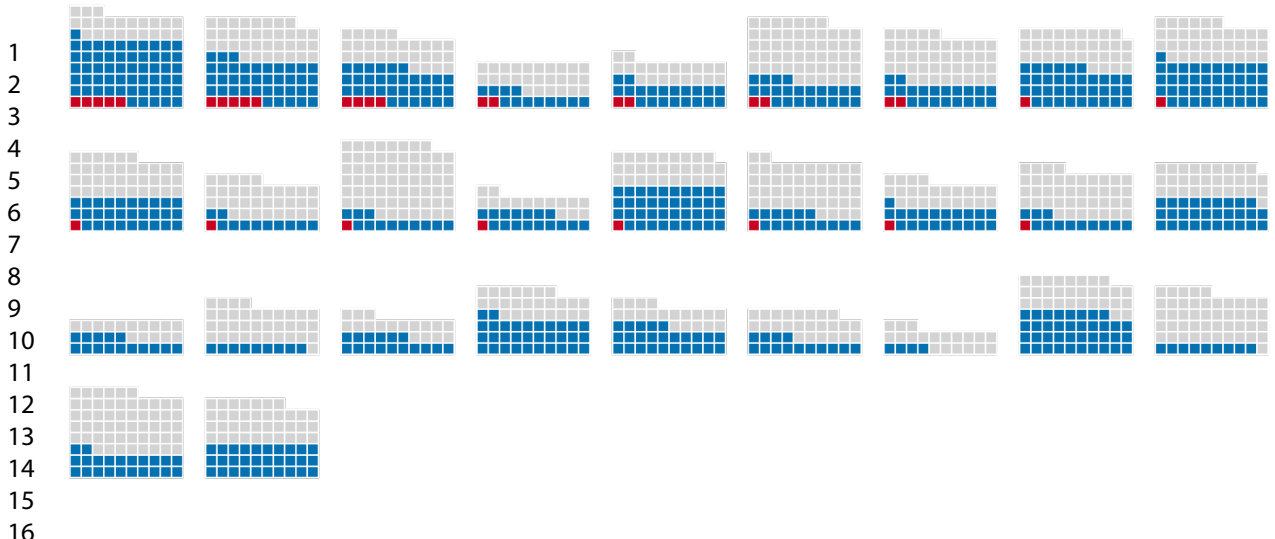

Middle level

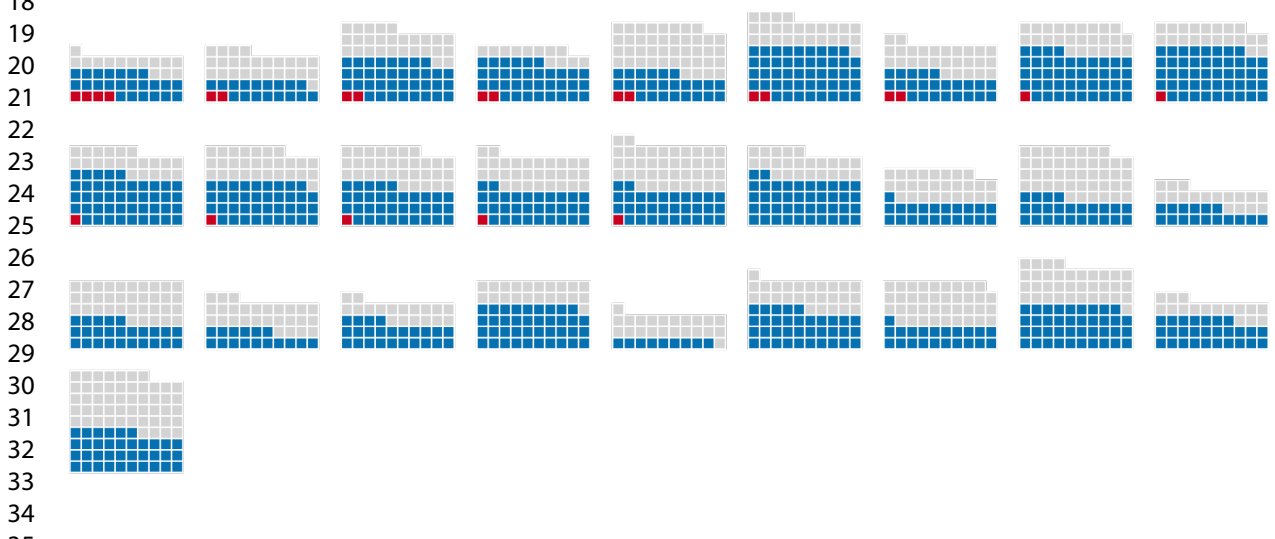

Upper level

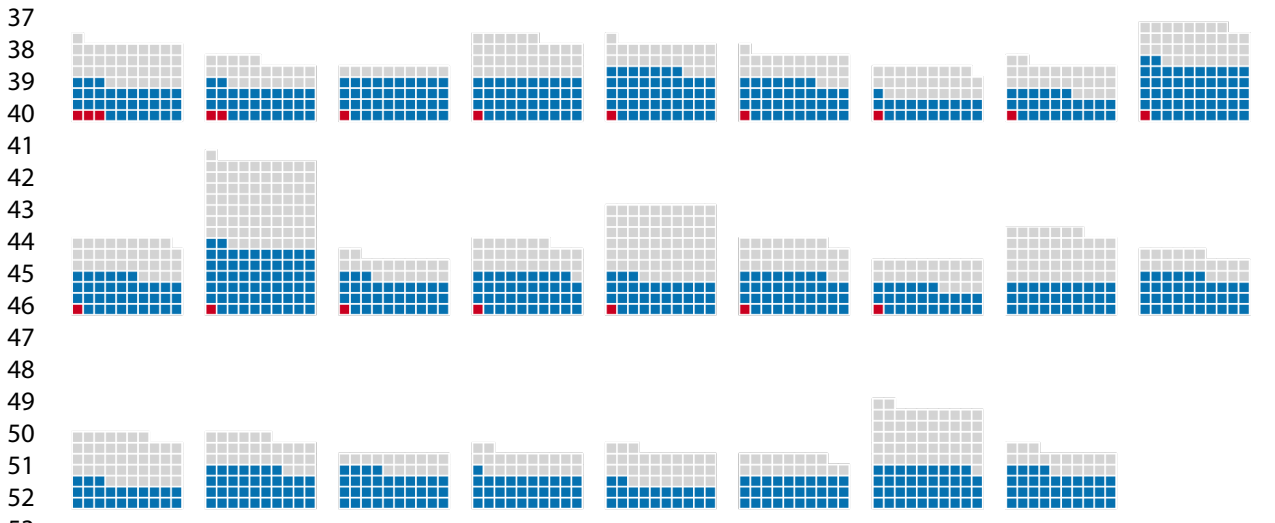



1  
2  
3  
4  
5  
6  
7  
8  
9  
10  
11  
12  
13  
14  
15  
16  
17  
18  
19  
20  
21  
22  
23  
24  
25  
26  
27  
28  
29  
30

- Lower
- ▲ Middle
- Upper

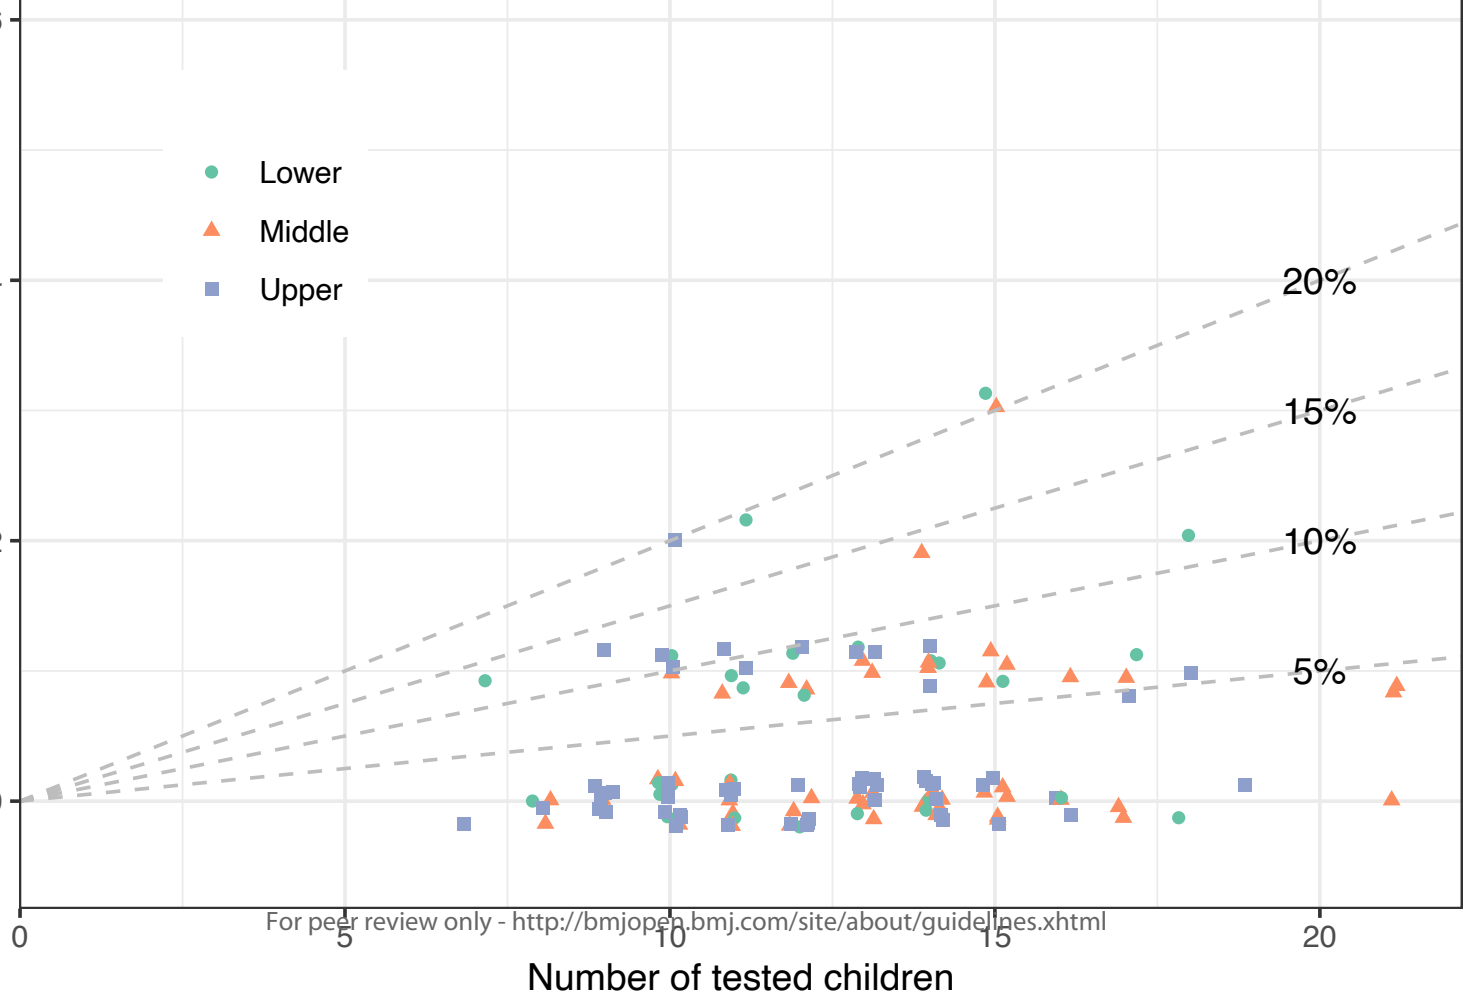

For peer review only - <http://bmjopen.bmj.com/site/about/guidelines.xhtml>

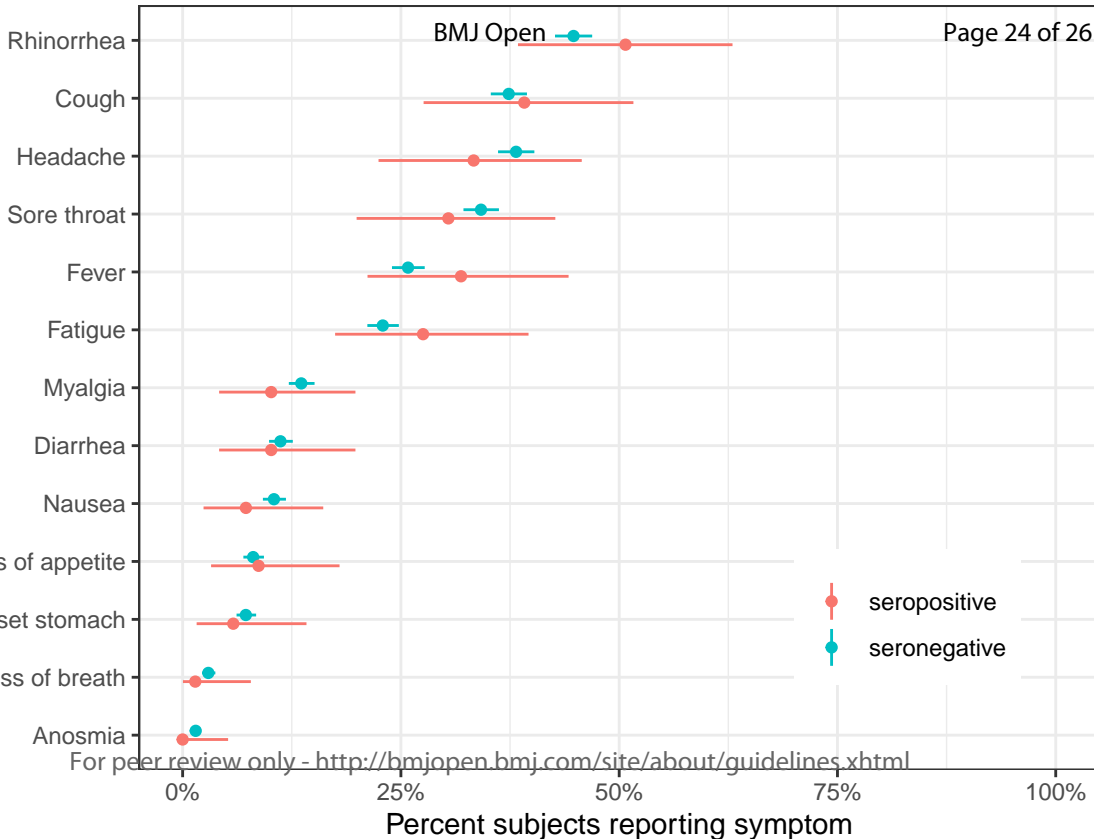

STROBE Statement—checklist of items that should be included in reports of observational studies

|                           | Item No. | Recommendation                                                                                                                                                                                                                                                                                                                                                                                                                                                         | Page No. | Relevant text from manuscript                                                                                                                                                                             |
|---------------------------|----------|------------------------------------------------------------------------------------------------------------------------------------------------------------------------------------------------------------------------------------------------------------------------------------------------------------------------------------------------------------------------------------------------------------------------------------------------------------------------|----------|-----------------------------------------------------------------------------------------------------------------------------------------------------------------------------------------------------------|
| <b>Title and abstract</b> | 1        | (a) Indicate the study’s design with a commonly used term in the title or the abstract                                                                                                                                                                                                                                                                                                                                                                                 | 5        | first cross-sectional analysis of a large cohort of children from randomly selected schools and classes                                                                                                   |
|                           |          | (b) Provide in the abstract an informative and balanced summary of what was done and what was found                                                                                                                                                                                                                                                                                                                                                                    | 3        |                                                                                                                                                                                                           |
| <b>Introduction</b>       |          |                                                                                                                                                                                                                                                                                                                                                                                                                                                                        |          |                                                                                                                                                                                                           |
| Background/rationale      | 2        | Explain the scientific background and rationale for the investigation being reported                                                                                                                                                                                                                                                                                                                                                                                   | 5        |                                                                                                                                                                                                           |
| Objectives                | 3        | State specific objectives, including any prespecified hypotheses                                                                                                                                                                                                                                                                                                                                                                                                       | 3, 5     | To determine the variation in SARS-CoV-2 seroprevalence in school children across districts, schools, grades, and classes, and the relationship of SARS-CoV-2 seroprevalence with self-reported symptoms. |
| <b>Methods</b>            |          |                                                                                                                                                                                                                                                                                                                                                                                                                                                                        |          |                                                                                                                                                                                                           |
| Study design              | 4        | Present key elements of study design early in the paper                                                                                                                                                                                                                                                                                                                                                                                                                | 6-8      |                                                                                                                                                                                                           |
| Setting                   | 5        | Describe the setting, locations, and relevant dates, including periods of recruitment, exposure, follow-up, and data collection                                                                                                                                                                                                                                                                                                                                        | 6        |                                                                                                                                                                                                           |
| Participants              | 6        | (a) <i>Cohort study</i> —Give the eligibility criteria, and the sources and methods of selection of participants. Describe methods of follow-up<br><i>Case-control study</i> —Give the eligibility criteria, and the sources and methods of case ascertainment and control selection. Give the rationale for the choice of cases and controls<br><i>Cross-sectional study</i> —Give the eligibility criteria, and the sources and methods of selection of participants | 6        |                                                                                                                                                                                                           |
|                           |          | (b) <i>Cohort study</i> —For matched studies, give matching criteria and number of exposed and unexposed                                                                                                                                                                                                                                                                                                                                                               |          |                                                                                                                                                                                                           |

|                              |    |                                                                                                                                                                                      |     |                                             |
|------------------------------|----|--------------------------------------------------------------------------------------------------------------------------------------------------------------------------------------|-----|---------------------------------------------|
|                              |    | <i>Case-control study</i> —For matched studies, give matching criteria and the number of controls per case                                                                           |     |                                             |
| Variables                    | 7  | Clearly define all outcomes, exposures, predictors, potential confounders, and effect modifiers. Give diagnostic criteria, if applicable                                             | 7-8 |                                             |
| Data sources/<br>measurement | 8* | For each variable of interest, give sources of data and details of methods of assessment (measurement). Describe comparability of assessment methods if there is more than one group | 7-8 |                                             |
| Bias                         | 9  | Describe any efforts to address potential sources of bias                                                                                                                            | 7   |                                             |
| Study size                   | 10 | Explain how the study size was arrived at                                                                                                                                            | 6   | Details are provided in the study protocol. |

Continued on next page

|                        |     |                                                                                                                                                                                                                    |      |
|------------------------|-----|--------------------------------------------------------------------------------------------------------------------------------------------------------------------------------------------------------------------|------|
| Quantitative variables | 11  | Explain how quantitative variables were handled in the analyses. If applicable, describe which groupings were chosen and why                                                                                       | 7-8  |
| Statistical methods    | 12  | (a) Describe all statistical methods, including those used to control for confounding                                                                                                                              | 7-8  |
|                        |     | (b) Describe any methods used to examine subgroups and interactions                                                                                                                                                | NA   |
|                        |     | (c) Explain how missing data were addressed                                                                                                                                                                        | NA   |
|                        |     | (d) <i>Cohort study</i> —If applicable, explain how loss to follow-up was addressed                                                                                                                                | 7-8  |
|                        |     | <i>Case-control study</i> —If applicable, explain how matching of cases and controls was addressed<br><i>Cross-sectional study</i> —If applicable, describe analytical methods taking account of sampling strategy |      |
|                        |     | (e) Describe any sensitivity analyses                                                                                                                                                                              | NA   |
| <b>Results</b>         |     |                                                                                                                                                                                                                    |      |
| Participants           | 13* | (a) Report numbers of individuals at each stage of study—eg numbers potentially eligible, examined for eligibility, confirmed eligible, included in the study, completing follow-up, and analysed                  | 6    |
|                        |     | (b) Give reasons for non-participation at each stage                                                                                                                                                               | 6    |
|                        |     | (c) Consider use of a flow diagram                                                                                                                                                                                 | NA   |
| Descriptive data       | 14* | (a) Give characteristics of study participants (eg demographic, clinical, social) and information on exposures and potential confounders                                                                           | 6, 9 |
|                        |     | (b) Indicate number of participants with missing data for each variable of interest                                                                                                                                | 6-7  |
|                        |     | (c) <i>Cohort study</i> —Summarise follow-up time (eg, average and total amount)                                                                                                                                   |      |
| Outcome data           | 15* | <i>Cohort study</i> —Report numbers of outcome events or summary measures over time                                                                                                                                |      |
|                        |     | <i>Case-control study</i> —Report numbers in each exposure category, or summary measures of exposure                                                                                                               |      |
|                        |     | <i>Cross-sectional study</i> —Report numbers of outcome events or summary measures                                                                                                                                 | 9    |
| Main results           | 16  | (a) Give unadjusted estimates and, if applicable, confounder-adjusted estimates and their precision (eg, 95% confidence interval). Make clear which confounders were adjusted for and why they were included       | 9    |
|                        |     | (b) Report category boundaries when continuous variables were categorized                                                                                                                                          | NA   |
|                        |     | (c) If relevant, consider translating estimates of relative risk into absolute risk for a meaningful time period                                                                                                   | NA   |

Continued on next page

|                          |    |                                                                                                                                                                            |       |
|--------------------------|----|----------------------------------------------------------------------------------------------------------------------------------------------------------------------------|-------|
| Other analyses           | 17 | Report other analyses done—eg analyses of subgroups and interactions, and sensitivity analyses                                                                             | 9     |
| <b>Discussion</b>        |    |                                                                                                                                                                            |       |
| Key results              | 18 | Summarise key results with reference to study objectives                                                                                                                   | 11    |
| Limitations              | 19 | Discuss limitations of the study, taking into account sources of potential bias or imprecision. Discuss both direction and magnitude of any potential bias                 | 12-13 |
| Interpretation           | 20 | Give a cautious overall interpretation of results considering objectives, limitations, multiplicity of analyses, results from similar studies, and other relevant evidence | 13    |
| Generalisability         | 21 | Discuss the generalisability (external validity) of the study results                                                                                                      | 13    |
| <b>Other information</b> |    |                                                                                                                                                                            |       |
| Funding                  | 22 | Give the source of funding and the role of the funders for the present study and, if applicable, for the original study on which the present article is based              | 14    |

\*Give information separately for cases and controls in case-control studies and, if applicable, for exposed and unexposed groups in cohort and cross-sectional studies.

**Note:** An Explanation and Elaboration article discusses each checklist item and gives methodological background and published examples of transparent reporting. The STROBE checklist is best used in conjunction with this article (freely available on the Web sites of PLoS Medicine at <http://www.plosmedicine.org/>, Annals of Internal Medicine at <http://www.annals.org/>, and Epidemiology at <http://www.epidem.com/>). Information on the STROBE Initiative is available at [www.strobe-statement.org](http://www.strobe-statement.org).

# BMJ Open

## Variation in SARS-CoV-2 seroprevalence across districts, schools and classes: baseline measurements of primary and secondary school children cohort in Switzerland

|                                 |                                                                                                                                                                                                                                                                                                                                                                                                                                                                                                                                                                                                                                                                                                                                                                                                                                                                                                                                                                                                                                                                                                                                                                                                                                                                                                                                                                                                                                                                                                                                                                                   |
|---------------------------------|-----------------------------------------------------------------------------------------------------------------------------------------------------------------------------------------------------------------------------------------------------------------------------------------------------------------------------------------------------------------------------------------------------------------------------------------------------------------------------------------------------------------------------------------------------------------------------------------------------------------------------------------------------------------------------------------------------------------------------------------------------------------------------------------------------------------------------------------------------------------------------------------------------------------------------------------------------------------------------------------------------------------------------------------------------------------------------------------------------------------------------------------------------------------------------------------------------------------------------------------------------------------------------------------------------------------------------------------------------------------------------------------------------------------------------------------------------------------------------------------------------------------------------------------------------------------------------------|
| Journal:                        | <i>BMJ Open</i>                                                                                                                                                                                                                                                                                                                                                                                                                                                                                                                                                                                                                                                                                                                                                                                                                                                                                                                                                                                                                                                                                                                                                                                                                                                                                                                                                                                                                                                                                                                                                                   |
| Manuscript ID                   | bmjopen-2020-047483.R1                                                                                                                                                                                                                                                                                                                                                                                                                                                                                                                                                                                                                                                                                                                                                                                                                                                                                                                                                                                                                                                                                                                                                                                                                                                                                                                                                                                                                                                                                                                                                            |
| Article Type:                   | Original research                                                                                                                                                                                                                                                                                                                                                                                                                                                                                                                                                                                                                                                                                                                                                                                                                                                                                                                                                                                                                                                                                                                                                                                                                                                                                                                                                                                                                                                                                                                                                                 |
| Date Submitted by the Author:   | 27-Feb-2021                                                                                                                                                                                                                                                                                                                                                                                                                                                                                                                                                                                                                                                                                                                                                                                                                                                                                                                                                                                                                                                                                                                                                                                                                                                                                                                                                                                                                                                                                                                                                                       |
| Complete List of Authors:       | <p>Ulyte, Agne; University of Zurich, Epidemiology, Biostatistics and Prevention Institute (EBPI)</p> <p>Radtke, Thomas; University of Zurich, Epidemiology, Biostatistics and Prevention Institute (EBPI)</p> <p>Abela, Irene; University of Zurich, Institute of Medical Virology</p> <p>Haile, Sarah; University of Zurich, Epidemiology, Biostatistics and Prevention Institute (EBPI)</p> <p>Blankenberger, Jacob; University of Zurich, Epidemiology, Biostatistics and Prevention Institute (EBPI)</p> <p>Jung, Ruedi; University of Zurich, Epidemiology, Biostatistics and Prevention Institute (EBPI)</p> <p>Capelli, Celine; University of Zurich, Epidemiology, Biostatistics and Prevention Institute (EBPI)</p> <p>Berger, Christoph; University Children's Hospital Zürich</p> <p>Frei, Anja; University of Zurich, Epidemiology, Biostatistics and Prevention Institute (EBPI)</p> <p>Huber, Michael; University of Zurich, Institute of Medical Virology;</p> <p>Schanz, Merle; University of Zurich, Institute of Medical Virology</p> <p>Schwarzmueller, Magdalena; University of Zurich, Institute of Medical Virology</p> <p>Trkola, Alexandra; University of Zurich, Institute of Medical Virology</p> <p>Fehr, Jan; University Hospital Zurich, Division of Infectious Diseases &amp; Hospital Epidemiology; University of Zurich, Epidemiology, Biostatistics and Prevention Institute (EBPI)</p> <p>Puhan, Milo; University of Zurich, Institute of Epidemiology, Biostatistics &amp; Prevention (EBPI)</p> <p>Kriemler, Susi; University of Zurich,</p> |
| <b>Primary Subject Heading</b>: | Epidemiology                                                                                                                                                                                                                                                                                                                                                                                                                                                                                                                                                                                                                                                                                                                                                                                                                                                                                                                                                                                                                                                                                                                                                                                                                                                                                                                                                                                                                                                                                                                                                                      |
| Secondary Subject Heading:      | Infectious diseases, Public health                                                                                                                                                                                                                                                                                                                                                                                                                                                                                                                                                                                                                                                                                                                                                                                                                                                                                                                                                                                                                                                                                                                                                                                                                                                                                                                                                                                                                                                                                                                                                |
| Keywords:                       | Paediatric infectious disease & immunisation < PAEDIATRICS, Infection control < INFECTIOUS DISEASES, Epidemiology < INFECTIOUS DISEASES, VIROLOGY, Community child health < PAEDIATRICS                                                                                                                                                                                                                                                                                                                                                                                                                                                                                                                                                                                                                                                                                                                                                                                                                                                                                                                                                                                                                                                                                                                                                                                                                                                                                                                                                                                           |
|                                 |                                                                                                                                                                                                                                                                                                                                                                                                                                                                                                                                                                                                                                                                                                                                                                                                                                                                                                                                                                                                                                                                                                                                                                                                                                                                                                                                                                                                                                                                                                                                                                                   |

1  
2  
3  
4  
5  
6  
7  
8  
9  
10  
11  
12  
13  
14  
15  
16  
17  
18  
19  
20  
21  
22  
23  
24  
25  
26  
27  
28  
29  
30  
31  
32  
33  
34  
35  
36  
37  
38  
39  
40  
41  
42  
43  
44  
45  
46  
47  
48  
49  
50  
51  
52  
53  
54  
55  
56  
57  
58  
59  
60

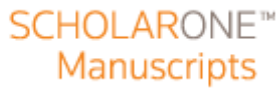



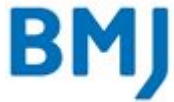

I, the Submitting Author has the right to grant and does grant on behalf of all authors of the Work (as defined in the below author licence), an exclusive licence and/or a non-exclusive licence for contributions from authors who are: i) UK Crown employees; ii) where BMJ has agreed a CC-BY licence shall apply, and/or iii) in accordance with the terms applicable for US Federal Government officers or employees acting as part of their official duties; on a worldwide, perpetual, irrevocable, royalty-free basis to BMJ Publishing Group Ltd ("BMJ") its licensees and where the relevant Journal is co-owned by BMJ to the co-owners of the Journal, to publish the Work in this journal and any other BMJ products and to exploit all rights, as set out in our [licence](#).

The Submitting Author accepts and understands that any supply made under these terms is made by BMJ to the Submitting Author unless you are acting as an employee on behalf of your employer or a postgraduate student of an affiliated institution which is paying any applicable article publishing charge ("APC") for Open Access articles. Where the Submitting Author wishes to make the Work available on an Open Access basis (and intends to pay the relevant APC), the terms of reuse of such Open Access shall be governed by a Creative Commons licence – details of these licences and which [Creative Commons](#) licence will apply to this Work are set out in our licence referred to above.

Other than as permitted in any relevant BMJ Author's Self Archiving Policies, I confirm this Work has not been accepted for publication elsewhere, is not being considered for publication elsewhere and does not duplicate material already published. I confirm all authors consent to publication of this Work and authorise the granting of this licence.

**1 Title**

2 Variation in SARS-CoV-2 seroprevalence across districts, schools and classes: baseline  
3 measurements of primary and secondary school children cohort in Switzerland

**5 Authors**

6 Agne Ulyte\*, researcher, Thomas Radtke\*, senior researcher, Irene A. Abela\*, researcher,  
7 Sarah R. Haile, senior statistician, Jacob Blankenberger, master student, Ruedi Jung,  
8 researcher, Céline Capelli, master student, Christoph Berger, professor, Anja Frei, senior  
9 researcher, Michael Huber, researcher, Merle Schanz, researcher, Magdalena  
10 Schwarzmüller, doctoral student, Alexandra Trkola#, professor, Jan Fehr#, professor, Milo  
11 A. Puhon#, professor, Susi Kriemler\$#, professor

12 \* shared first authorship

13 # shared last authorship

**15 Corresponding author:**

16 Susi Kriemler

17 Tel: +41 44 634 63 20

18 susi.kriemlerwiget@uzh.ch

19 Epidemiology, Biostatistics and Prevention Institute (EBPI), University of Zurich

20 Hirschengraben 84

21 8001 Zürich, Switzerland

23 **Agne Ulyte**, [agne.ulyte@uzh.ch](mailto:agne.ulyte@uzh.ch), Epidemiology, Biostatistics and Prevention Institute (EBPI),  
24 University of Zurich, Hirschengraben 84, 8001 Zürich, Switzerland

25 **Thomas Radtke**, [thomas.radtke@uzh.ch](mailto:thomas.radtke@uzh.ch), Epidemiology, Biostatistics and Prevention  
26 Institute (EBPI), University of Zurich, Hirschengraben 84, 8001 Zürich, Switzerland

27 **Irene A. Abela**, [irene.abela@usz.ch](mailto:irene.abela@usz.ch), Institute of Medical Virology, University of Zurich,  
28 Winterthurerstrasse 190, 8057 Zürich, Switzerland

29 **Sarah R. Haile**, [sarah.haile@uzh.ch](mailto:sarah.haile@uzh.ch), Epidemiology, Biostatistics and Prevention Institute  
30 (EBPI), University of Zurich, Hirschengraben 84, 8001 Zürich, Switzerland

31 **Jacob Blankenberger**, [jacob.blankenberger@uzh.ch](mailto:jacob.blankenberger@uzh.ch), Epidemiology, Biostatistics and  
32 Prevention Institute (EBPI), University of Zurich, Hirschengraben 84, 8001 Zürich,  
33 Switzerland

34 **Ruedi Jung**, [ruedi.jung@uzh.ch](mailto:ruedi.jung@uzh.ch), Epidemiology, Biostatistics and Prevention Institute (EBPI),

1  
2  
3  
4  
5  
6  
7  
8  
9  
10  
11  
12  
13  
14  
15  
16  
17  
18  
19  
20  
21  
22  
23  
24  
25  
26  
27  
28  
29  
30  
31  
32  
33  
34  
35  
36  
37  
38  
39  
40  
41  
42  
43  
44  
45  
46  
47  
48  
49  
50  
51  
52  
53  
54  
55  
56  
57  
58  
59  
60

University of Zurich, Hirschengraben 84, 8001 Zürich, Switzerland

**Céline Capelli**, [celine.capelli@uzh.ch](mailto:celine.capelli@uzh.ch), Epidemiology, Biostatistics and Prevention Institute (EBPI), University of Zurich, Hirschengraben 84, 8001 Zürich, Switzerland

**Christoph Berger**, [Christoph.Berger@kispi.uzh.ch](mailto:Christoph.Berger@kispi.uzh.ch), University Children Hospital Zurich, Steinwiesstrasse 75, 8032 Zürich, Switzerland

**Anja Frei**, [anja.frei@uzh.ch](mailto:anja.frei@uzh.ch), Epidemiology, Biostatistics and Prevention Institute (EBPI), University of Zurich, Hirschengraben 84, 8001 Zürich, Switzerland

**Michael Huber**, [huber.michael@virology.uzh.ch](mailto:huber.michael@virology.uzh.ch), Institute of Medical Virology, University of Zurich, Winterthurerstrasse 190, 8057 Zürich, Switzerland

**Merle Schanz**, [schanz.merle@virology.uzh.ch](mailto:schanz.merle@virology.uzh.ch), Institute of Medical Virology, University of Zurich, Winterthurerstrasse 190, 8057 Zürich, Switzerland

**Magdalena Schwarzmueller**, [schwarzmueller.magdalena@virology.uzh.ch](mailto:schwarzmueller.magdalena@virology.uzh.ch), Institute of Medical Virology, University of Zurich, Winterthurerstrasse 190, 8057 Zürich, Switzerland

**Alexandra Trkola**, [trkola.alexandra@virology.uzh.ch](mailto:trkola.alexandra@virology.uzh.ch), Institute of Medical Virology, University of Zurich, Winterthurerstrasse 190, 8057 Zürich, Switzerland

**Jan Fehr**, [jan.fehr@uzh.ch](mailto:jan.fehr@uzh.ch), Epidemiology, Biostatistics and Prevention Institute (EBPI), University of Zurich, Hirschengraben 84, 8001 Zürich; Division of Infectious Diseases & Hospital Epidemiology, University Hospital Zurich, Rämistrasse 100, 8091 Zurich, Switzerland

**Milo A. Puhan**, [miloalan.puhan@uzh.ch](mailto:miloalan.puhan@uzh.ch), Epidemiology, Biostatistics and Prevention Institute (EBPI), University of Zurich, Hirschengraben 84, 8001 Zürich, Switzerland

**Susi Kriemler**, [susi.kriemlerwiget@uzh.ch](mailto:susi.kriemlerwiget@uzh.ch), Epidemiology, Biostatistics and Prevention Institute (EBPI), University of Zurich, Hirschengraben 84, 8001 Zürich, Switzerland

Word count: 3200

**Abstract**

**Objectives:** To determine the variation in SARS-CoV-2 seroprevalence in school children, and the relationship with self-reported symptoms.

**Design:** Baseline measurements of a longitudinal cohort study (*Ciao Corona*) from June-July 2020.

**Setting:** 55 schools stratified by district in the canton of Zurich, Switzerland.

**Participants:** 2585 children (1339 girls, median age 11, age range 6-16 years), attending grades 1-2, 4-5 and 7-8.

**Main outcome measures:** Variation in seroprevalence of SARS-CoV-2 in children across 12 cantonal districts, schools, and grades, assessed with Luminex-based test of four epitopes for IgG, IgA and IgM (ABCORA 2.0). Clustering of cases within classes. Association of seropositivity and symptoms. Comparison with seroprevalence in adult population, assessed with Luminex-based test of IgG and IgA (SenASTriS).

**Results:** Overall seroprevalence was 2.8% (95% CI 1.5 to 4.1%), ranging from 1.0% to 4.5% across districts. Seroprevalence in grades 1-2 was 3.8% (2.0 to 6.1%), in grades 4-5 – 2.4% (1.1 to 4.2%), and in grades 7-8 – 1.5% (0.5 to 3.0%). At least one seropositive child was present in 36 of 55 (65%) schools and in 44 (34%) of 131 classes where  $\geq 5$  children and  $\geq 50\%$  of children within the class were tested. 73% of children reported COVID-19-compatible symptoms since January 2020, with the same frequency in seropositive and seronegative children for all symptoms. Seroprevalence of children and adults was similar (3.2%, 95% CrI 1.7-5.0%, versus 3.6%, 95% CrI 1.7-5.4%). The ratio of confirmed SARS-CoV-2 cumulative incidence to seropositive cases was 1:89 in children and 1:12 in adults.

**Conclusions:** SARS-CoV-2 seroprevalence was low in children and similar to that in adults by the end of June 2020. Very low ratio of diagnosed to seropositive children was observed. We did not detect clustering of SARS-CoV-2 seropositive children within classes, but the follow-up of this study will shed more light on transmission within schools.

**Trial registration:** ClinicalTrials.gov NCT04448717.  
<https://clinicaltrials.gov/ct2/show/NCT04448717>

**Key words:** SARS-CoV-2, COVID-19, children, adolescents, school.

90

91 **Article summary**

92

93 **Strengths and limitations of this study**

- 94 • This study presents the results of a regionally representative cohort of children,  
95 randomly selected on school and class levels, and thus, allowing the analysis of  
96 clustering of cases within classes and schools.
- 97 • This cross-sectional analysis estimates the seroprevalence in children in June-July in  
98 Switzerland, from a period when there is very little evidence about SARS-CoV-2  
99 seroprevalence in children globally.
- 100 • Serological test with high sensitivity and specificity was used, and Bayesian  
101 hierarchical models were applied to estimate seroprevalence, adjusting for test  
102 accuracy parameters.
- 103 • Self-reported symptoms might be subject to recall-bias, particularly when reporting  
104 retrospectively for a period of over six months.

105

106

## 107 INTRODUCTION

108 The transmission of severe acute respiratory syndrome coronavirus 2 (SARS-CoV-2) in the  
109 school setting is not well understood [1], partly as schools were closed in many countries  
110 during the peaks of the pandemic, partly due to lack of representative studies with random  
111 sampling. Anecdotal evidence and case studies suggest that outbreaks can happen in  
112 schools [2–4], but it is not clear if they represent outlier events or widely underdiagnosed  
113 spread of the infection. The effect of school closures on the community transmission of  
114 SARS-CoV-2 ranges from minimal to substantial [5], with some modelling studies even  
115 predicting an increase of the total number of deaths [6]. Currently existing or planned  
116 population-based studies focusing on SARS-CoV-2 spread in schools are few and small-sized  
117 [7,8].

118 In this study, we present the results of the first cross-sectional analysis of a large  
119 cohort of children from randomly selected schools and classes in the canton of Zurich,  
120 Switzerland. The cohort study follows the seroprevalence, symptoms, socio-demographic  
121 and lifestyle factors of enrolled children from June 2020 to April 2021. The participating  
122 children were enrolled from June 16 to July 9, 2020. Schools in Switzerland were closed for a  
123 relatively short period (March 16 to May 10) compared to other countries, and lock-down  
124 measures were mild. Restaurants, bars and non-essential shops and services were closed on  
125 March 17 and events or meetings with over 5 people prohibited on March 20, but no strict  
126 confinement at home implemented. These measures were gradually lifted in April-May  
127 2020.

128 The aim of this analysis is to present the overall estimate of seroprevalence in  
129 children and its variation across districts, schools, grades and classes, the association of  
130 seroprevalence with self-reported symptoms, and the clustering of seropositive children  
131 within classes.

132

133

## 134 METHODS

### 135 *Study setting*

136 The study was registered on ClinicalTrials.gov (identifier number NCT04448717). The  
137 protocol for this longitudinal cohort study was reported elsewhere [9]. The study is part of a  
138 large nationally coordinated research network *Corona Immunitas* in Switzerland [10,11].  
139 The study took place from June 16 to July 9, 2020, in the canton of Zurich, Switzerland. The  
140 canton of Zurich comprises 1.5 million residents, roughly 18% of the Swiss population, and  
141 includes both urban and rural settings, as well as an ethnically and linguistically diverse  
142 population. The first preventive measures in schools were introduced on March 16, 2020,  
143 when physical attendance of schools was stopped. Schools were partly reopened on May  
144 10, with a combination of online and on-site teaching with preventive measures (e.g.,  
145 teaching in smaller groups, school attendance every second day, sports and large group  
146 activities limited). Schools were fully reopened on June 7, with minimal preventive measures  
147 (e.g., recommended social distancing for teachers, reduction of group events) and otherwise  
148 regular operation (e.g., full classrooms with desks mostly facing forward) until the end of the  
149 school year on July 17. The prevention measures implemented in schools after May 10 were  
150 school-specific and based on the federal and cantonal guidelines [12].

151

### 152 *Study procedures*

153 School were selected based on a full list of schools provided by the Educational Department  
154 of the canton. Primary schools were randomly selected by a computer program from the list  
155 of all primary schools in the respective district. The closest secondary school (often in the  
156 same building or area) was then selected. The random sample of primary and secondary  
157 schools was stratified by geographic district. Within schools, randomly selected classes in  
158 lower school level (grades one to two, attended by 6 to 9-year-old children), middle (grades  
159 four to five, 9 to 13-year-old children), and upper school level (grades seven to eight, 12 to  
160 16-year-old children) were invited. Invited grades and classes were selected to ensure that  
161 the same cohort of children within the class can be followed until April 2021. Therefore,  
162 grades 1-2, 4-5 and 7-8 (but not grades 3, 6, and 9) were included, as they normally stay in  
163 the same school and class for the next school-year. We aimed to enroll at least three classes  
164 and 40 children per school level. As we were only able to test the children at schools, a  
165 major exclusion criterion was a suspected or confirmed infection with SARS-CoV-2 in the  
166 given child on the testing date, precluding attendance of school.



1 167 Study information, link to study website ([www.ciao-corona.ch](http://www.ciao-corona.ch)), and informational  
2 168 videos in multiple languages for schools, parents, and children were sent to school principals  
3  
4 169 and further to families of children from the selected classes. Children were enrolled and  
5  
6 170 venous blood samples taken in schools between June 16 and July 9, 2020. Questionnaires  
7  
8 171 with information on socio-demographics and symptoms compatible with SARS-CoV-2  
9  
10 172 infection from January to June, 2020, were completed online for the majority of children by  
11  
12 173 their parents in June-July, 2020 (for 3% of children in August-September).

13 174 In total, 55 out of 156 invited primary and secondary schools agreed to participate,  
14  
15 175 and 2585 children in 273 out of 274 invited classes (no children participated in one class).  
16  
17 176 Venous blood samples were collected from 2484 children (a sufficient amount of blood  
18  
19 177 could not be obtained from 101 children). An online questionnaire, containing socio-  
20  
21 178 demographic, health, symptoms and quality of life information for the children, and socio-  
22  
23 179 demographic and symptoms information for the household members, was completed for  
24  
25 180 2288 of all enrolled children. Questionnaires were not filled for 297 children, after several  
26  
27 181 email and phone call reminders.

28 182

### 29 183 **Serological tests**

30  
31 184 The primary outcome of the study was the serological results of blood serum samples  
32  
33 185 analyzed with ABCORA 2.0 binding assay of the Institute of Medical Virology (IMV) of the  
34  
35 186 University of Zurich based on the Luminex technology [13]. The test analyzes  
36  
37 187 immunoglobulins G (IgG), M (IgM) and A (IgA) against four SARS-CoV-2 targets (receptor  
38  
39 188 binding domain (RBD), spike proteins S1 and S2, and the nucleocapsid protein (N), yielding  
40  
41 189 12 different measurements. Cut-off values were established against pre-pandemic plasma  
42  
43 190 allowing a high sensitivity (93.3%) and specificity (99.6%). Samples were defined as  
44  
45 191 seropositive for SARS-CoV-2 if at least two of the 12 parameters were above the cut-off.

46 192 SARS-CoV-2 seroprevalence in children was compared to that estimated in a random  
47  
48 193 sample from the general population, adjusting for age group and sex, in the same region in  
49  
50 194 June-July 2020. The adult study, like all studies of the Swiss-wide research program *Corona*  
51  
52 195 *Immunitas* [10,11], used the test SenASTrIS (Sensitive Anti-SARS-CoV-2 Spike Trimer  
53  
54 196 Immunoglobulin Serological) developed by the Centre Hospitalier Universitaire Vaudois  
55  
56 197 (CHUV), the Swiss Federal Institute of Technology in Lausanne (EPFL) and the Swiss Vaccine  
57  
58 198 Center [14]. The test also uses Luminex technology to detect IgG and IgA antibodies binding  
59  
60 199 to the entire trimeric S protein of SARS-CoV-2 and with demonstrated 98.3% sensitivity and  
200 98.4% specificity for the combined testing of IgG and IgA (result declared as positive when



201 either or both were positive) [14]. In order to compare the seroprevalence estimates in  
202 children and adult cohorts, blood serum samples of 2476 children were also analyzed with  
203 the SenASTrIS test (samples were insufficient for analysis with the second test for 8  
204 children) and compared to a random population sample of 857 adults who took part in the  
205 second phase of the Switzerland-wide *Corona Immunitas* research program [11].

206 Seroprevalence was also compared to the cumulative incidence of reverse  
207 transcription polymerase chain reaction (RT-PCR)-confirmed SARS-CoV-2 infections in adults  
208 and children, based on official statistics up to the beginning of June [15].

209

### 210 **Statistical analysis**

211 Statistical analysis included descriptive statistics and Bayesian hierarchical modelling to  
212 estimate seroprevalence [16]. The Bayesian approach allowed to account for the sensitivity  
213 and specificity of the SARS-CoV-2 antibody test and the hierarchical structure of cohort  
214 (individual and school levels). The model (Bayesian logistic regression) was adjusted for  
215 participants' sex, grade, and geographic district of the school, and included random effects  
216 for school levels (lower, middle and upper). In order to compute an estimate representative  
217 for the population of the canton of Zurich, we applied post-stratification weights, which  
218 adjusted for the total population size of the specific school level and the geographic district.

219 The factor of confirmed to total infections was calculated as the ratio of RT-PCR-  
220 confirmed cumulative incidence by the end of June 2020 and the estimated seroprevalence.  
221 We assessed the clustering of seropositive children within classes, school levels, and schools  
222 by studying the distribution of classes with zero, one, or more seropositive children. As the  
223 probability of detecting a seropositive child increases with more children tested, we  
224 separately assessed the proportion of classes with at least one seropositive child among all  
225 class and among classes with  $\geq 5$  participating children and  $\geq 50\%$  of children participating  
226 from the class.

227

### 228 **Patient and public involvement**

229 Several school principals were consulted during the development of the protocol to ensure  
230 feasibility of the planned study procedures. Early feedback was collected from invited  
231 children and parents, in order to adapt the communication strategies and channels.

232 Numerous online informational sessions, encouraging open exchange and feedback, were  
233 organized for invited and enrolled school principals, personnel and parents of the children.

234 Results of individual tests were communicated to the participants, and overall study results

1 235 disseminated to participating schools. Findings will be disseminated in lay language in the  
2 236 national and local press, to the national and regional educational and public health  
3  
4 237 departments and on the website of the study ([www.ciao-corona.ch](http://www.ciao-corona.ch)).  
5  
6 238  
7  
8  
9  
10  
11  
12  
13  
14  
15  
16  
17  
18  
19  
20  
21  
22  
23  
24  
25  
26  
27  
28  
29  
30  
31  
32  
33  
34  
35  
36  
37  
38  
39  
40  
41  
42  
43  
44  
45  
46  
47  
48  
49  
50  
51  
52  
53  
54  
55  
56  
57  
58  
59  
60

For peer review only

## 239 RESULTS

240 In total, 55 schools and 2585 children were recruited (1339 (52%) girls, median age 11, age  
241 range 6-16 years), 754 (29%) in the lower level, 899 (35%) in the middle, and 932 (36%) in  
242 the upper school level. Mean participation rate was 50% of the invited children within  
243 invited classes (range from 0% to 94% (0 to 21 children), interquartile range 32% to 63%).  
244 Venous blood was collected and analyzed for 2484 children (1278 (51%) girls, median age  
245 11, age range 6 to 16 years).

246 74 children had SARS-CoV-2 antibodies, resulting in overall weighted seroprevalence  
247 of 2.8 % (95% credible interval (CrI) 1.5 to 4.1%), ranging from 1.0% to 4.5% in districts, as  
248 measured with ABCORA test (Figure 1). Seroprevalence was 3.8% (95% CrI 2.0 to 6.1%) in  
249 grades one to two, 2.4% (95% CrI 1.1 to 4.2%) in grades four to five, and 1.5% (95% CrI 0.5 to  
250 3.0%) in grades seven to eight (Figure 1).

251 Seroprevalence of children, as measured with the SenASTriS test of IgG and IgA  
252 combined, was very similar to the seroprevalence of randomly selected adults in the same  
253 region in June-July 2020 (children 3.2%, 95% CrI 1.7 to 5.0%, versus adults 3.6%, 95% CrI 1.7  
254 to 5.4%). The estimates of seroprevalence in different school levels and districts were  
255 similar to those estimated with the primary ABCORA 2.0 test (Figure 1). Seroprevalence  
256 measured with SenASTriS test was 2.0% (95% CrI 0.6 to 4.3%) in grades one to two, 4.2%  
257 (95% CrI 2.1 to 6.8%) in grades four to five, and 3.3% (95% CrI 1.4 to 5.6%) in grades seven  
258 to eight.

259 Based on the cumulative incidence of SARS-CoV-2 RT-PCR-confirmed cases by the  
260 end of June (0.03% for children and 0.24% for adult populations), the ratio of confirmed  
261 infections to seropositive cases in children was one to 89, compared to a ratio of one to 12  
262 in the adult population.

263

264 **Figure 1** Overall, school level and district estimates of SARS-CoV-2 seroprevalence in  
265 children

266 Weighted point estimates and 95% credible intervals are shown. Districts are ordered by population size.  
267 ABCORA 2.0 – Primary estimate based on the ABCORA 2.0 of the Institute of Medical Virology, University  
268 of Zurich test.

269 SenASTriS – Estimate based on the SenASTriS test.

270

271 At least one seropositive child was present in 36/55 (65%) of tested schools. Within the  
272 levels of the schools, at least one seropositive child was present in the lower level of 17/29  
273 (59%) schools, in the middle level of 14/28 (50%) schools, and in the upper level of 16/25  
274 (64%) schools (Figure 2).

**Figure 2** Seropositive children in tested schools and school levels

Each square illustrates an invited child. Each block of squares illustrates a school level in a school. Lower and middle levels are both taught in the primary schools; however, lower and middle levels of the same school are not matched in this graph due to protection of participant privacy. The distribution of the invited, tested and seropositive children is depicted only on the school level in the figures of this manuscript to preserve deidentification and privacy of the participants.

No sex differences in seroprevalence were noted (2.8% (95% CrI 1.6 to 4.1%) in girls and 2.7% (95% CrI 1.5 to 4.0%) in boys). 73% of children reported any SARS-CoV-2 compatible symptoms, such as cough, fever, fatigue or diarrhea (see Figure 3 for the full list), between January and June 2020. None of the symptoms was more frequent in seropositive than in seronegative children (Figure 3).

**Figure 3** Self-reported symptoms in seropositive and seronegative children in January-June 2020

Point estimates and 95% confidence intervals are shown.

At least one seropositive child was present in 34% (44/131) of classes where  $\geq 5$  children and  $\geq 50\%$  of children within the class were tested (Figure 4). Among the classes with at least one seropositive child, 38 (86%) had only one, 4 (9%) had two and 2 (5%) had three seropositive children. When considering all classes regardless of participation rate, 24% (65/273) of classes had at least one seropositive child.

**Figure 4** Clustering of seropositive children in classes: number and proportion of seropositive children in the tested classes

Each dot represents a class. Diagonal lines partition the figure into classes with 0-5% of tested seropositive children (below 5% line), 5-10% of tested seropositive children (between 5% and 10% lines), etc. Only classes where at least 5 children and at least 50% of the class were tested are shown. The distribution of seropositive children in the enrolled classes is only presented in an aggregated form rather than clustered within schools to preserve the deidentification and privacy of the participants.

**DISCUSSION**

1  
2  
3  
4  
5  
6  
7  
8  
9  
10  
11  
12  
13  
14  
15  
16  
17  
18  
19  
20  
21  
22  
23  
24  
25  
26  
27  
28  
29  
30  
31  
32  
33  
34  
35  
36  
37  
38  
39  
40  
41  
42  
43  
44  
45  
46  
47  
48  
49  
50  
51  
52

307 **DISCUSSION**  
308 In this study of randomly sampled schools and classes, we found variation in seroprevalence  
309 in 6 to 16-year-old children across districts, schools and classes by July 2020, but no  
310 indication of major transmission and outbreaks within classes and schools. The overall  
311 seroprevalence was not different from a randomly selected adult population living in the  
312 same region – pointing to striking underdiagnosis of SARS-CoV-2 infection in children, with  
313 only one in 89 cases diagnosed. Contrary to studies of symptomatic infections [17] and  
314 some other population-based studies of seroprevalence [16,18], there was a trend of higher  
315 seroprevalence in younger children as measured with the main ABCORA test (the trend was  
316 not present in seroprevalence estimated based on SenASTriS test). The presence of  
317 symptoms was very common (three of four children reported one or several symptoms  
318 compatible with a COVID-19 infection) and importantly not specific to the seropositive  
319 children. Although no outbreaks were reported in schools at the time of testing in the  
320 canton of Zurich (comprising 18% of the Swiss population), seropositive children were  
321 detected in more than half of the tested schools and a third of all tested classes. However,  
322 the vast majority of classes with seropositive children had only a single seropositive child  
323 among the tested children, reflecting low prevalence and no significant clustering within  
324 classes after the re-opening of the schools.

325 By the time of conducting this study, there were few studies focusing on SARS-CoV-2  
326 spread in schools [18–20]. Most of the reported evidence consisted of cases studies of  
327 outbreaks in specific schools or reports of contact tracing of index cases in educational  
328 settings. Most of the studies reported low secondary attack rates in schools [4,21] but also  
329 some conflicting observations of outbreaks [2,22]. Although some studies of seroprevalence  
330 had included children [16,23,24], they mostly focused on households and the general  
331 population. The management of SARS-CoV-2 transmission in schools was therefore highly  
332 debated [25,26]. The present study is unique as one of the first major studies reporting  
333 variation in seroprevalence in children from randomly selected schools in a country where  
334 the general lock-down on a population level was mild and short (one month), and school  
335 closure lasted only for two months.

336 Although manifest clinical disease of COVID-19 is much less prevalent in children  
337 than in adults [17,27,28] and preliminary evidence points to lower susceptibility of children  
338 compared to adults [18], our results indicate very similar seroprevalence in adults and  
339 children. Similar seroprevalence in adults and school-aged children was found in another  
340 region in Switzerland in April [16] and in November 2020 [29]. Intriguingly, we observed a

1 341 not statistically significant trend of younger children having higher seroprevalence than  
2 342 older children, when measured with the comprehensive ABCORA 2.0 test. Infections with  
3 343 circulating human coronaviruses (hCoVs) are common in childhood and antibodies to hCoVs  
4 344 229E, NL63, OC43 and HKU1A are prevalent in the human population and particularly  
5 345 children [30,31]. Cross-reactivity with hCoVs was thus considered in the development of  
6 346 both serology tests used in this study and both tests detect SARS-CoV-2 with high specificity  
7 347 (99.6% for ABCORA 2.0 and 98.4% for SenASTriS). Importantly, to adjust for the possibility of  
8 348 a few false-positive results, we employed a Bayesian hierarchical model, which adjusts for  
9 349 the accuracy parameters of the tests to estimate population-level seroprevalence. Higher  
10 350 seroprevalence in younger children could be compatible with less feasible social distancing  
11 351 behavior and possibly more vigorous immune response to the virus in early age. The trend  
12 352 could also reflect a chance finding, as substantial proportion of false positives is expected in  
13 353 the low seroprevalence setting, and it was not observed in the SenASTriS test results.  
14 354 Further testing of the cohort and forthcoming studies will show if this trend is observed in  
15 355 the future.

16 356 The frequency of both more specific (e.g., fever, cough) and less specific (rhinorrhea,  
17 357 headache, nausea) symptoms [32] was not different among seropositive and seronegative  
18 358 children. In general, symptoms, particularly rhinorrhea, cough, headache and sore throat,  
19 359 were reported frequently, with three of four children reporting any symptoms within the  
20 360 last 6 months in both groups. Anosmia was not reported by any of the seropositive children.  
21 361 The specificity of COVID-19 compatible symptoms, therefore, seems to be lower in children  
22 362 than in adults. Moreover, the range of symptoms reported in children was shown to be  
23 363 different than in adults [33]. Somewhat unspecific symptoms in children, contrary to more  
24 364 specific symptoms in adults [34], could partly explain the high proportion of seropositive  
25 365 children who were not previously diagnosed with RT-PCR. Furthermore, testing indications  
26 366 by health authorities were cautious both for children and adults during the first half of 2020.  
27 367 Testing was recommended only for children with acute upper respiratory tract infection  
28 368 symptoms or acute anosmia, and not recommended in children with rhinitis only or without  
29 369 symptoms [35].

30 370 Particular strengths of the design of this study are school-based random sampling,  
31 371 hierarchical data structure, and large sample size, allowing to identify clusters within  
32 372 district, school, grade and class levels. Testing was done in schools and study information  
33 373 presented in multiple formats, including videos in multiple languages, to minimize selection  
34 374 bias within enrolled children. The participation rate of 50% can be considered rather high

1 375 for a study in children involving venous blood sampling, and additional children from the  
2 376 invited classes will have the opportunity to be enrolled in subsequent testing phases  
3  
4 377 (October/November 2020, March/April 2021), further increasing participation rate and the  
5  
6 378 size of the cohort.

7 379 The study has a few limitations. First, the retrospective evaluation of symptoms over  
8  
9 380 six months could have been subject to recall bias. Second, the study enrolled only 35%  
10  
11 381 (55/156) of the invited schools. Commonly stated reasons for non-participation on school  
12  
13 382 level were constraints in time and human resources and competing participation in other  
14  
15 383 studies. Participation rate on school level varied significantly depending on the district, and  
16  
17 384 for a few districts, a maximum of three invitation rounds was needed to recruit a regionally  
18  
19 385 representative sample. Third, although the schools were open for one to two months  
20  
21 386 directly before the study, they were closed for the two months of the highest community  
22  
23 387 transmission of SARS-CoV-2 in the canton of Zurich [15]. Therefore, the measured  
24  
25 388 seroprevalence in children might be dominated by infections in households rather than  
26  
27 389 school. The follow up of this study will shed more light on transmission in schools.

28 390 In conclusion, clustering of SARS-CoV-2 seropositive children within classes and  
29  
30 391 schools was not prominent shortly after reopening of schools in this large population-based  
31  
32 392 study. Seroprevalence was similar to adults, resulting in strikingly fewer diagnosed  
33  
34 393 infections in comparison to the seropositive cases in children than in adults. Considering the  
35  
36 394 time window required for SARS-CoV-2 antibodies to form, this study reflects infection of  
37  
38 395 SARS-CoV-2 until approximately end of May 2020, covering four months of SARS-CoV-2  
39  
40 396 infection in the community, with two months of school closure and mild lock-down policy.  
41  
42 397 The subsequent testing of parents and school personnel and the follow-up of the children  
43  
44 398 cohort in fall 2020 will yield further evidence on the observed trends and of the spread of  
45  
46 399 SARS-CoV-2 within and outside schools.

47 400  
48  
49  
50  
51  
52  
53  
54  
55  
56  
57  
58  
59  
60



**401 Author Contributions**

1  
2 402 SK and MAP initiated the project and preliminary design, with support of JF. SK, MAP, CB,  
3  
4 403 TR, RJ, JB, AF and AU developed the design and methodology. SK, RJ, AU, TR, JB, AF and CC  
5  
6 404 recruited study participants, collected and managed the data. SRH performed statistical  
7  
8 405 analysis. AT, MH, MaSch, MeSch and IA developed the serology analysis plan, supervised,  
9  
10 406 conducted and evaluated the serology tests. AU wrote the first draft of the manuscript. All  
11  
12 407 authors contributed to the design of the study and interpretation of its results, and revised  
13  
14 408 and approved the manuscript for intellectual content. SK is the guarantor and accepts full  
15  
16 409 responsibility for the work and the conduct of the study, had access to the data, and  
17  
18 410 controlled the decision to publish. The corresponding author SK attests that all listed  
19  
20 411 authors meet authorship criteria and that no others meeting the criteria have been omitted.

21 412

**413 Competing interests**

22  
23  
24 414 The authors declare no competing interests to disclose.

25 415

**416 Funding**

26  
27  
28  
29 417 This study is part of *Corona Immunitas* research network, coordinated by the Swiss School of  
30  
31 418 Public Health (SSPH+), and funded by fundraising of SSPH+ that includes funds of the Swiss  
32  
33 419 Federal Office of Public Health and private funders (ethical guidelines for funding stated by  
34  
35 420 SSPH+ will be respected), by funds of the Cantons of Switzerland (Vaud, Zurich and Basel)  
36  
37 421 and by institutional funds of the Universities. Additional funding, specific to this study is  
38  
39 422 available from the University of Zurich Foundation. The funder/sponsor did not have any  
40  
41 423 role in the design and conduct of the study; collection, management, analysis, and  
42  
43 424 interpretation of the data; preparation, review, or approval of the manuscript; and decision  
44  
45 425 to submit the manuscript for publication. All authors had full access to all data analysis  
46  
47 426 outputs (reports and tables) and take responsibility for their integrity and accuracy

48 427

**428 Data sharing statement**

49  
50  
51 429 Data is still being collected for the cohort study *Ciao Corona*. Deidentified participant data  
52  
53 430 might be available on reasonable request by email to the corresponding author at later  
54  
55 431 stages of the study.

56 432

**433 Ethics approval**



434 The study was approved by the Ethics Committee of the Canton of Zurich, Switzerland  
 435 (2020-01336). All participants provided written informed consent before being enrolled in  
 436 the study.

437

#### 438 **Transparency declaration**

439 The lead authors affirm that the manuscript is an honest, accurate, and transparent account  
 440 of the study being reported, no important aspects of the study have been omitted, and any  
 441 discrepancies from the study as originally planned and registered have been explained.

442

#### 443 **References**

- 444 1 Viner RM, Russell SJ, Croker H, *et al.* School closure and management practices during  
 445 coronavirus outbreaks including COVID-19: a rapid systematic review. *Lancet Child*  
 446 *Adolesc. Heal.* 2020;**4**:397–404. doi:10.1016/S2352-4642(20)30095-X
- 447 2 Stein-Zamir C, Abramson N, Shoob H, *et al.* A large COVID-19 outbreak in a high  
 448 school 10 days after schools' reopening, Israel, May 2020. *Eurosurveillance*  
 449 2020;**25**:2001352. doi:10.2807/1560-7917.ES.2020.25.29.2001352
- 450 3 Lopez AS, Hill M, Antezano J, *et al.* Transmission Dynamics of COVID-19 Outbreaks  
 451 Associated with Child Care Facilities — Salt Lake City, Utah, April–July 2020. *MMWR*  
 452 *Morb Mortal Wkly Rep* 2020;**69**:1319–23. doi:10.15585/mmwr.mm6937e3
- 453 4 Macartney K, Quinn HE, Pillsbury AJ, *et al.* Transmission of SARS-CoV-2 in Australian  
 454 educational settings: a prospective cohort study. *Lancet Child Adolesc Heal* 2020;**0**.  
 455 doi:10.1016/s2352-4642(20)30251-0
- 456 5 Walsh S, Chowdhury A, Russell S, *et al.* Do school closures reduce community  
 457 transmission of COVID-19? A systematic review of observational studies. *medRxiv*  
 458 2021;:2021.01.02.21249146. doi:10.1101/2021.01.02.21249146
- 459 6 Rice K, Wynne B, Martin V, *et al.* Effect of school closures on mortality from  
 460 coronavirus disease 2019: old and new predictions. *BMJ* 2020;**371**:m3588.  
 461 doi:10.1136/bmj.m3588
- 462 7 Ladhani S, Ramsay M, Amirthalingam G, *et al.* COVID-19 Surveillance in Children  
 463 attending preschool, primary and secondary schools. 2020.  
 464 [https://assets.publishing.service.gov.uk/government/uploads/system/uploads/attach](https://assets.publishing.service.gov.uk/government/uploads/system/uploads/attachment_data/file/891762/sKID_protocol_v1.3.pdf)  
 465 [ment\\_data/file/891762/sKID\\_protocol\\_v1.3.pdf](https://assets.publishing.service.gov.uk/government/uploads/system/uploads/attachment_data/file/891762/sKID_protocol_v1.3.pdf)
- 466 8 Armann JP, Unrath M, Kirsten C, *et al.* Anti-SARS-CoV-2 IgG antibodies in adolescent  
 467 students and their teachers in Saxony, Germany (SchoolCoviDD19): very low  
 468 seroprevalence and transmission rates. *medRxiv* 2020;:2020.07.16.20155143.

- 469 doi:10.1101/2020.07.16.20155143
- 1 470 9 Ulyte A, Radtke T, Abela IA, *et al.* Seroprevalence and immunity of SARS-CoV-2  
2 infection in children and adolescents in schools in Switzerland: design for a  
3 longitudinal, school-based prospective cohort study. *Int J Public Health* Published  
4 471 Online First: 15 October 2020. doi:10.1007/s00038-020-01495-z  
5 472  
6 473  
7 474 10 Corona Immunitas: a nationwide program of antibody studies of SARS-CoV-2 in the  
8 Swiss population (ISRCTN18181860). <http://www.isrctn.com/ISRCTN18181860>  
9 (accessed 28 Aug 2020).  
10 475  
11 476  
12 477 11 West EA, Anker D, Amati R, *et al.* Corona Immunitas: study protocol of a nationwide  
13 program of SARS-CoV-2 seroprevalence and seroepidemiologic studies in Switzerland.  
14 *Int J Public Health* 2020;:1–20. doi:10.1007/s00038-020-01494-0  
15 478  
16 479  
17 480 12 Information for public schools. Preventive regulations | Canton of Zurich.  
18 [https://www.zh.ch/de/gesundheit/coronavirus/informationen-rund-um-schulen-  
20 kitas-heime/coronavirus-volksschule.html#-1212670983](https://www.zh.ch/de/gesundheit/coronavirus/informationen-rund-um-schulen-<br/>19 kitas-heime/coronavirus-volksschule.html#-1212670983) (accessed 13 Nov 2020).  
21 481  
22 482  
23 483 13 Institute of Medical Virology IMV SARS-CoV-2 Antikörper Differenzierung (ABCORA).  
24 [https://www.virology.uzh.ch/dam/jcr:0f9bbdba-e215-4e42-a877-131a04a2e175/IMV-  
26 ABCORA\\_Serologie.pdf](https://www.virology.uzh.ch/dam/jcr:0f9bbdba-e215-4e42-a877-131a04a2e175/IMV-<br/>25 ABCORA_Serologie.pdf) (accessed 16 Dec 2020).  
27 484  
28 485  
29 486 14 Fenwick C, Croxatto A, Coste AT, *et al.* Changes in SARS-CoV-2 Spike versus  
30 Nucleoprotein Antibody Responses Impact the Estimates of Infections in Population-  
31 Based Seroprevalence Studies. *J Virol* Published Online First: 2020.  
32 doi:10.1128/JVI.01828-20  
33 487  
34 488  
35 489  
36 490 15 Canton of Zurich. Numbers and Facts on COVID-19 [Kanton Zürich. Zahlen & Fakten zu  
37 COVID-19]. [https://www.zh.ch/de/gesundheit/coronavirus/zahlen-fakten-covid-  
39 19.html?keyword=covid19#/home](https://www.zh.ch/de/gesundheit/coronavirus/zahlen-fakten-covid-<br/>38 19.html?keyword=covid19#/home) (accessed 13 Nov 2020).  
40 491  
41 492  
42 493 16 Stringhini S, Wisniak A, Piumatti G, *et al.* Seroprevalence of anti-SARS-CoV-2 IgG  
43 antibodies in Geneva, Switzerland (SEROCoV-POP): a population-based study. *Lancet*  
44 2020;0. doi:10.1016/S0140-6736(20)31304-0  
45 494  
46 495  
47 496 17 de Lusignan S, Dorward J, Correa A, *et al.* Risk factors for SARS-CoV-2 among patients  
48 in the Oxford Royal College of General Practitioners Research and Surveillance Centre  
49 primary care network: a cross-sectional study. *Lancet Infect Dis* 2020;20:1034–42.  
50 doi:10.1016/S1473-3099(20)30371-6  
51 497  
52 498  
53 499  
54 500 18 Viner RM, Mytton OT, Bonell C, *et al.* Susceptibility to SARS-CoV-2 Infection Among  
55 Children and Adolescents Compared With Adults. *JAMA Pediatr* Published Online  
56 First: 25 September 2020. doi:10.1001/jamapediatrics.2020.4573  
57 501  
58 502

- 1 503 19 Xu W, Li X, Dozier M, *et al.* What is the evidence for transmission of COVID-19 by  
 2 504 children in schools? A living systematic review. *medRxiv* Published Online First: 2020.  
 3  
 4 505 doi:10.1101/2020.10.11.20210658  
 5  
 6 506 20 Munro APS, Faust SN. COVID-19 in children. *Curr Opin Infect Dis* Published Online  
 7 507 First: 6 October 2020. doi:10.1097/QCO.0000000000000690  
 8  
 9 508 21 Heavey L, Casey G, Kelly C, *et al.* No evidence of secondary transmission of COVID-19  
 10 509 from children attending school in Ireland, 2020. *Eurosurveillance* 2020;**25**:2000903.  
 11 510 doi:10.2807/1560-7917.ES.2020.25.21.2000903  
 12  
 13 511 22 Szablewski CM, Chang KT, Brown MM, *et al.* SARS-CoV-2 Transmission and Infection  
 14 512 Among Attendees of an Overnight Camp — Georgia, June 2020. *MMWR Morb Mortal*  
 15 513 *Wkly Rep* 2020;**69**:1023–5. doi:10.15585/mmwr.mm6931e1  
 16  
 17 514 23 Pollán M, Pérez-Gómez B, Pastor-Barriuso R, *et al.* Prevalence of SARS-CoV-2 in Spain  
 18 515 (ENE-COVID): a nationwide, population-based seroepidemiological study. *Lancet*  
 19 516 *(London, England)* 2020;**0**. doi:10.1016/S0140-6736(20)31483-5  
 20  
 21 517 24 Waterfield T, Watson C, Moore R, *et al.* Seroprevalence of SARS-CoV-2 antibodies in  
 22 518 children - A prospective multicentre cohort study. *medRxiv*  
 23 519 2020;:2020.08.31.20183095. doi:10.1101/2020.08.31.20183095  
 24  
 25 520 25 Esposito S, Principi N. School Closure during the Coronavirus Disease 2019 (COVID-19)  
 26 521 Pandemic: An Effective Intervention at the Global Level? *JAMA Pediatr.* 2020.  
 27 522 doi:10.1001/jamapediatrics.2020.1892  
 28  
 29 523 26 Christakis DA. School Reopening-The Pandemic Issue That Is Not Getting Its Due.  
 30 524 *JAMA Pediatr.* 2020. doi:10.1001/jamapediatrics.2020.2068  
 31  
 32 525 27 Götzinger F, Santiago-García B, Noguera-Julián A, *et al.* COVID-19 in children and  
 33 526 adolescents in Europe: a multinational, multicentre cohort study. *Lancet Child Adolesc*  
 34 527 *Heal* 2020;**4**:653–61. doi:10.1016/S2352-4642(20)30177-2  
 35  
 36 528 28 Posfay-Barbe KM, Wagner N, Gauthey M, *et al.* COVID-19 in children and the  
 37 529 dynamics of infection in families. *Pediatrics* 2020;**146**. doi:10.1542/peds.2020-1576  
 38  
 39 530 29 Stringhini S, Zaballa M-E, Perez-Saez J, *et al.* Seroprevalence of anti-SARS-CoV-2  
 40 531 antibodies after the second pandemic peak. *Lancet Infect Dis* 2021;**0**.  
 41 532 doi:10.1016/S1473-3099(21)00054-2  
 42  
 43 533 30 Zhou W, Wang W, Wang H, *et al.* First infection by all four non-severe acute  
 44 534 respiratory syndrome human coronaviruses takes place during childhood. *BMC Infect*  
 45 535 *Dis* 2013;**13**:433. doi:10.1186/1471-2334-13-433  
 46  
 47 536 31 Ng KW, Faulkner N, Cornish GH, *et al.* Preexisting and de novo humoral immunity to

- 1 537 SARS-CoV-2 in humans. *Science (80- )* 2020;:eabe1107. doi:10.1126/science.abe1107
- 2 538 32 Viner R, Ward J, Hudson L, *et al.* Systematic review of reviews of symptoms and signs
- 3 of COVID-19 in children and adolescents. *medRxiv* 2020;:2020.10.16.20213298.
- 4 539 doi:10.1101/2020.10.16.20213298
- 5 540
- 6 541 33 Mayor S. Covid-19: UK studies find gastrointestinal symptoms are common in
- 7 children. doi:10.1101/2020.08.31.20183095v1
- 8 542
- 9 543 34 Struyf T, Deeks JJ, Dinnes J, *et al.* Signs and symptoms to determine if a patient
- 10 presenting in primary care or hospital outpatient settings has COVID-19 disease.
- 11 544 Cochrane Database Syst. Rev. 2020;2020. doi:10.1002/14651858.CD013665
- 12 545
- 13 546 35 COVID-19 Fragen und Antworten Teil 8 - pädiatrie schweiz.
- 14 547 <https://www.paediatricschweiz.ch/news/covid-19-fragen-und-antworten-teil-8/>
- 15 548 (accessed 23 Feb 2021).
- 16 549
- 17 550

1 **551 Figure legends**

2 552

3  
4 **553 Figure 1** Overall, school level and district estimates of SARS-CoV-2 seroprevalence in  
5 554 children

6  
7 555 Weighted point estimates and 95% credible intervals are shown. Districts are ordered by  
8 556 population size.

9  
10 557 ABCORA 2.0 – Primary estimate based on the ABCORA 2.0 of the Institute of Medical  
11 558 Virology, University of Zurich test. SenASTrIS – Estimate based on the SenASTrIS test.

12 559

13  
14 **560 Figure 2** Seropositive children in tested schools and school levels

15  
16 561 Each square illustrates an invited child. Each block of squares illustrates a school level in a  
17 562 school. Lower and middle levels are both taught in the primary schools; however, lower and  
18 563 middle levels of the same school are not matched in this graph due to protection of  
19 564 participant privacy. The distribution of the invited, tested and seropositive children is  
20 565 depicted only on the school level in the figures of this manuscript to preserve  
21 566 deidentification and privacy of the participants.

22 567

23  
24 **568 Figure 3** Self-reported symptoms in seropositive and seronegative children in January-June  
25 569 2020

26  
27 570 Point estimates and 95% confidence intervals are shown.

28 571

29  
30 **572 Figure 4** Clustering of seropositive children in classes: number and proportion of

31 573 seropositive children in the tested classes

32  
33 574 Each dot represents a class. Diagonal lines partition the figure into classes with 0-5% of  
34 575 tested seropositive children (below 5% line), 5-10% of tested seropositive children (between  
35 576 5% and 10% lines), etc. Only classes where at least 5 children and at least 50% of the class  
36 577 were tested are shown. The distribution of seropositive children in the enrolled classes is  
37 578 only presented in an aggregated form rather than clustered within schools to preserve the  
38 579 deidentification and privacy of the participants.

39  
40 580

41

42

43

44

45

46

47

48

49

50

51

52

53

54

55

56

57

58

59

60

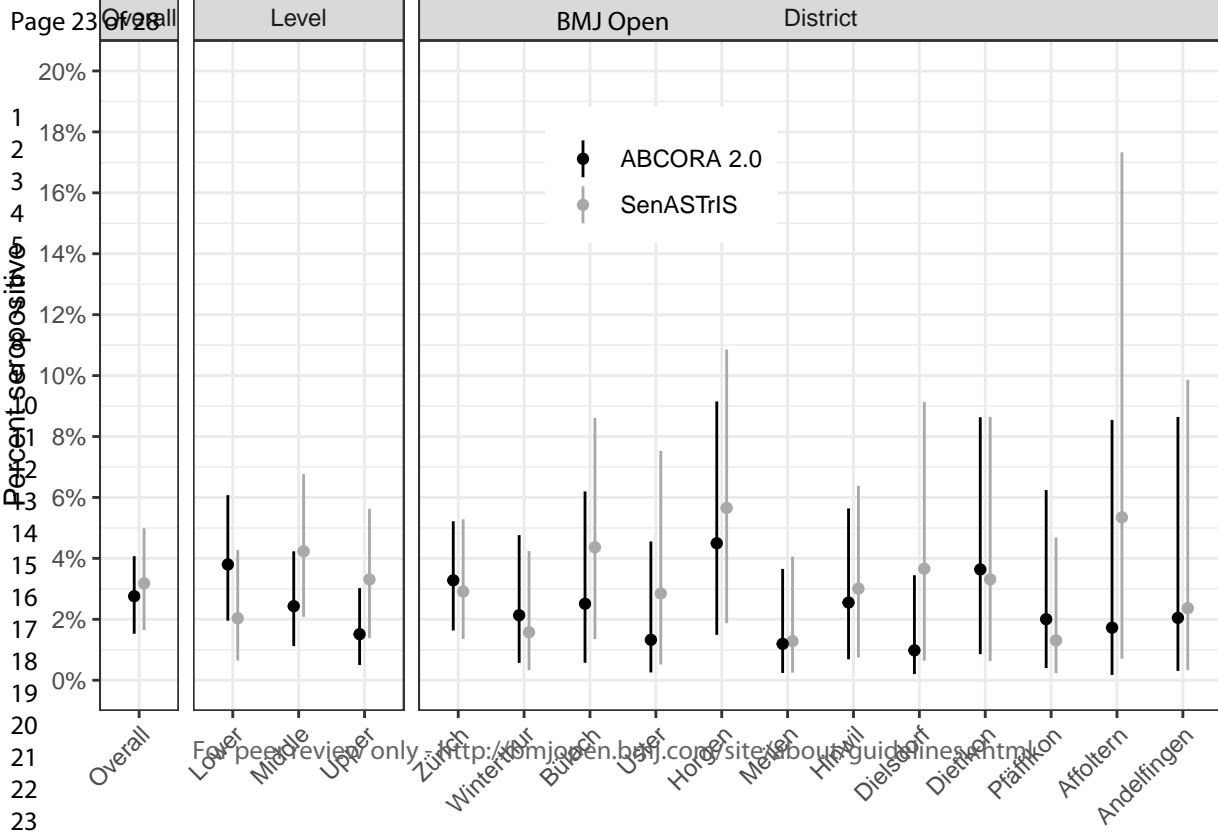



Middle level



Upper level

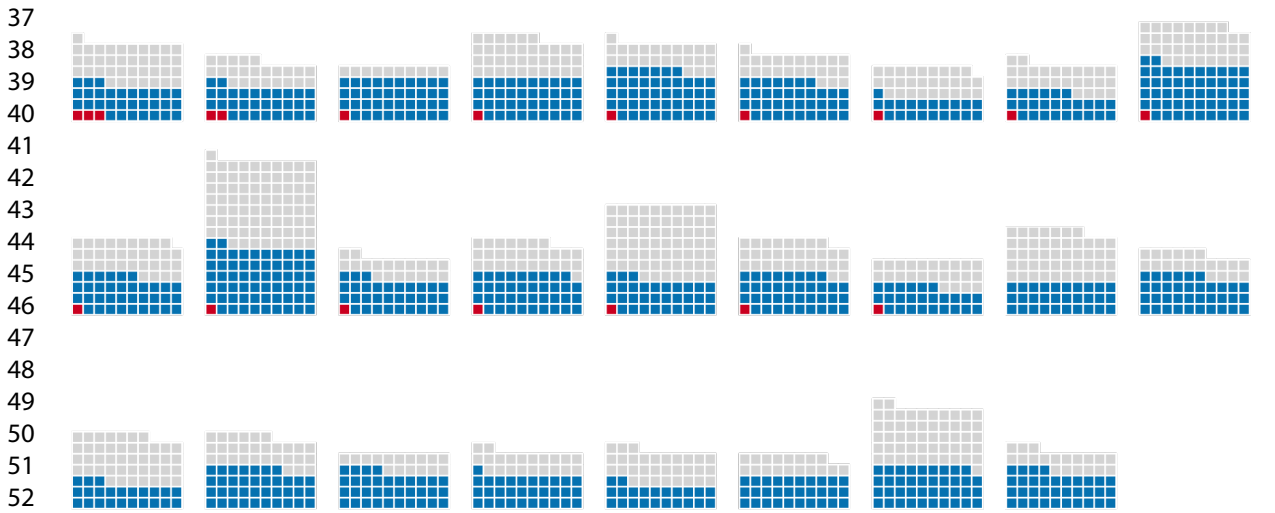

1  
2  
3  
4  
5  
6  
7  
8  
9  
10  
11  
12  
13  
14  
15  
16  
17  
18  
19  
20  
21  
22  
23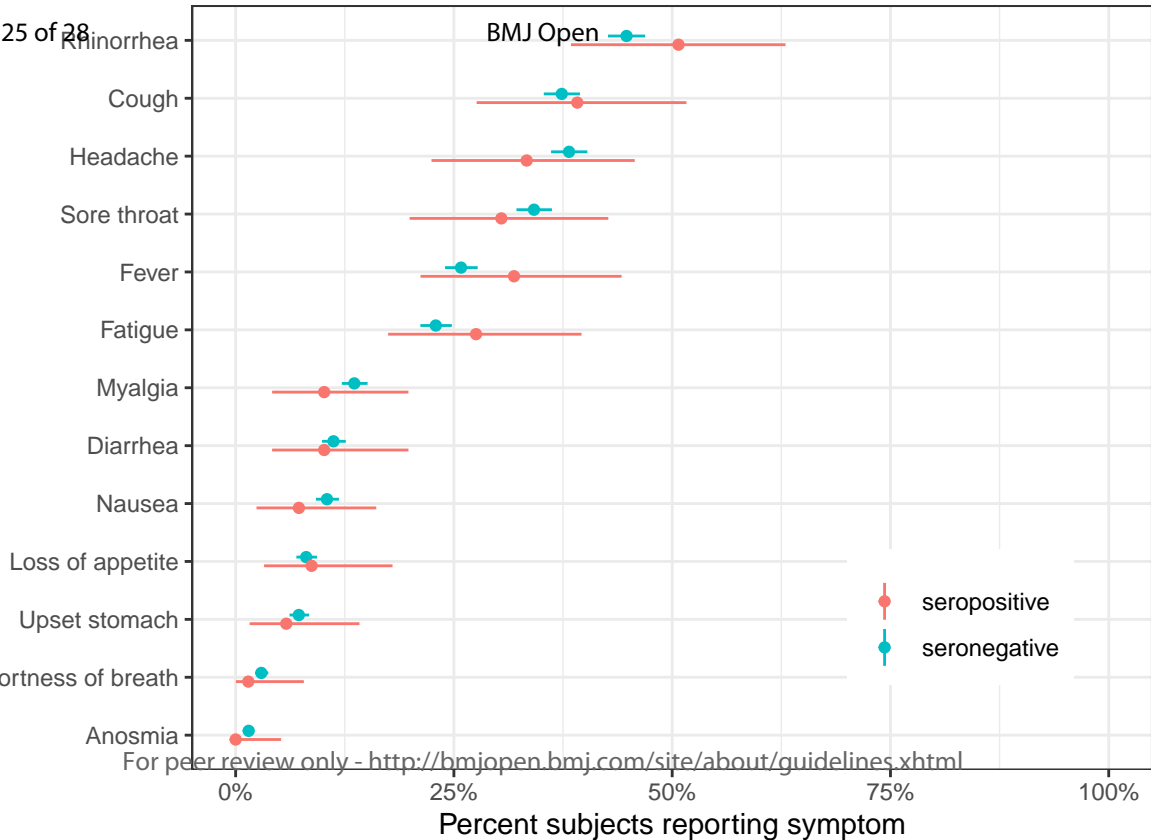



1  
2  
3  
4  
5  
6  
7  
8  
9  
10  
11  
12  
13  
14  
15  
16  
17  
18  
19  
20  
21  
22  
23  
24  
25  
26  
27  
28  
29  
30

- Lower
- ▲ Middle
- Upper

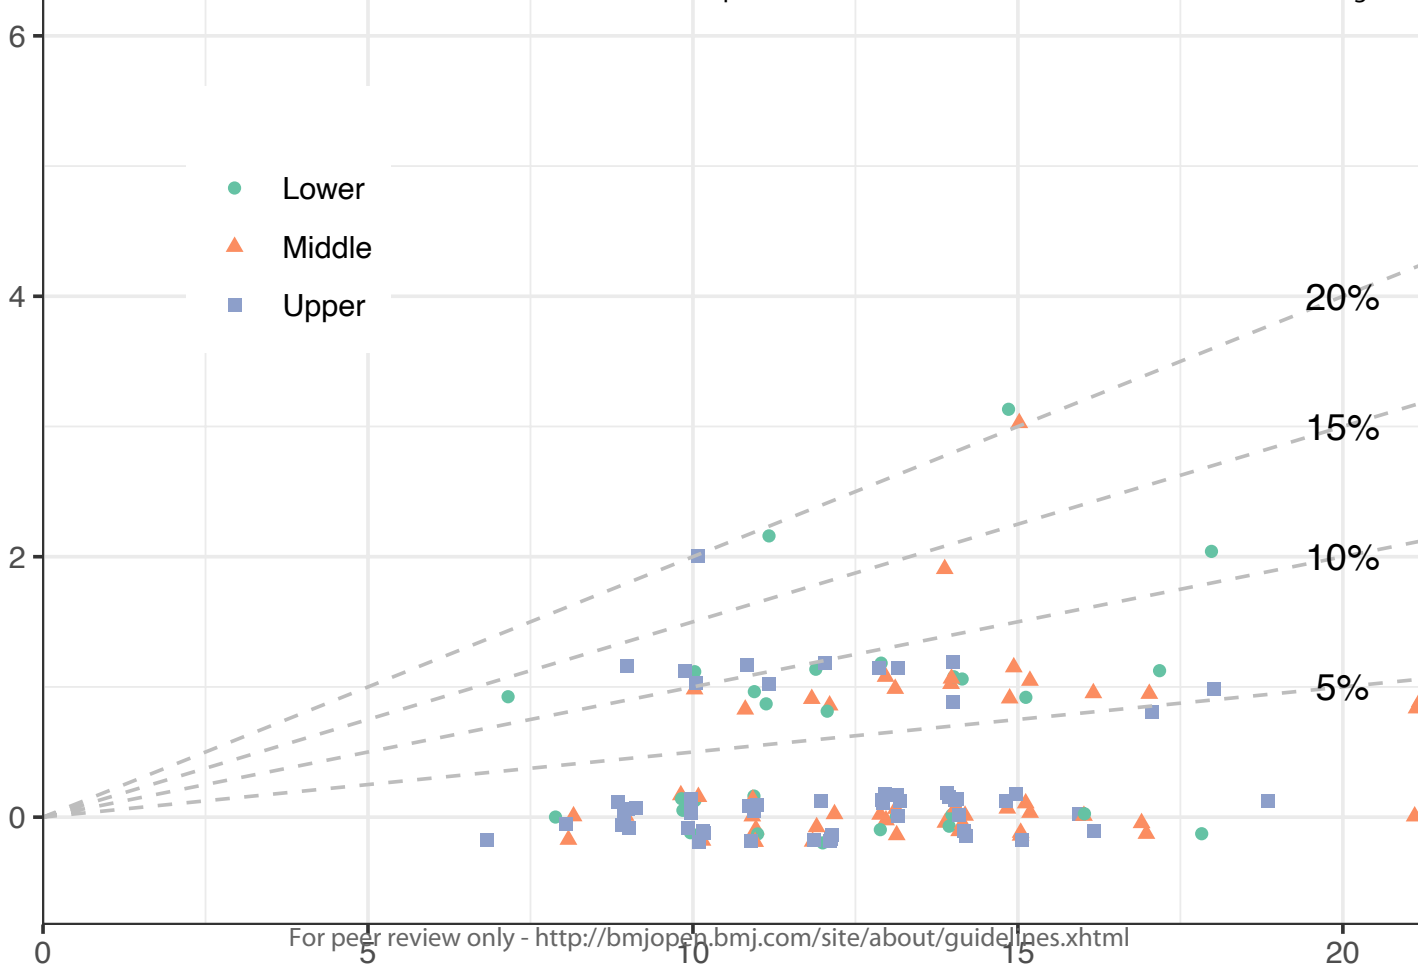

STROBE Statement—checklist of items that should be included in reports of observational studies

|                           | Item No. | Recommendation                                                                                                                                                                                                                                                                                                                                                                                                                                                         | Page No. | Relevant text from manuscript                                                                                                                                                                             |
|---------------------------|----------|------------------------------------------------------------------------------------------------------------------------------------------------------------------------------------------------------------------------------------------------------------------------------------------------------------------------------------------------------------------------------------------------------------------------------------------------------------------------|----------|-----------------------------------------------------------------------------------------------------------------------------------------------------------------------------------------------------------|
| <b>Title and abstract</b> | 1        | (a) Indicate the study’s design with a commonly used term in the title or the abstract                                                                                                                                                                                                                                                                                                                                                                                 | 5        | first cross-sectional analysis of a large cohort of children from randomly selected schools and classes                                                                                                   |
|                           |          | (b) Provide in the abstract an informative and balanced summary of what was done and what was found                                                                                                                                                                                                                                                                                                                                                                    | 3        |                                                                                                                                                                                                           |
| <b>Introduction</b>       |          |                                                                                                                                                                                                                                                                                                                                                                                                                                                                        |          |                                                                                                                                                                                                           |
| Background/rationale      | 2        | Explain the scientific background and rationale for the investigation being reported                                                                                                                                                                                                                                                                                                                                                                                   | 5        |                                                                                                                                                                                                           |
| Objectives                | 3        | State specific objectives, including any prespecified hypotheses                                                                                                                                                                                                                                                                                                                                                                                                       | 3, 5     | To determine the variation in SARS-CoV-2 seroprevalence in school children across districts, schools, grades, and classes, and the relationship of SARS-CoV-2 seroprevalence with self-reported symptoms. |
| <b>Methods</b>            |          |                                                                                                                                                                                                                                                                                                                                                                                                                                                                        |          |                                                                                                                                                                                                           |
| Study design              | 4        | Present key elements of study design early in the paper                                                                                                                                                                                                                                                                                                                                                                                                                | 6-8      |                                                                                                                                                                                                           |
| Setting                   | 5        | Describe the setting, locations, and relevant dates, including periods of recruitment, exposure, follow-up, and data collection                                                                                                                                                                                                                                                                                                                                        | 6        |                                                                                                                                                                                                           |
| Participants              | 6        | (a) <i>Cohort study</i> —Give the eligibility criteria, and the sources and methods of selection of participants. Describe methods of follow-up<br><i>Case-control study</i> —Give the eligibility criteria, and the sources and methods of case ascertainment and control selection. Give the rationale for the choice of cases and controls<br><i>Cross-sectional study</i> —Give the eligibility criteria, and the sources and methods of selection of participants | 6        |                                                                                                                                                                                                           |
|                           |          | (b) <i>Cohort study</i> —For matched studies, give matching criteria and number of exposed and unexposed                                                                                                                                                                                                                                                                                                                                                               |          |                                                                                                                                                                                                           |

|                              |    |                                                                                                                                                                                      |     |                                             |
|------------------------------|----|--------------------------------------------------------------------------------------------------------------------------------------------------------------------------------------|-----|---------------------------------------------|
|                              |    | <i>Case-control study</i> —For matched studies, give matching criteria and the number of controls per case                                                                           |     |                                             |
| Variables                    | 7  | Clearly define all outcomes, exposures, predictors, potential confounders, and effect modifiers. Give diagnostic criteria, if applicable                                             | 7-8 |                                             |
| Data sources/<br>measurement | 8* | For each variable of interest, give sources of data and details of methods of assessment (measurement). Describe comparability of assessment methods if there is more than one group | 7-8 |                                             |
| Bias                         | 9  | Describe any efforts to address potential sources of bias                                                                                                                            | 7   |                                             |
| Study size                   | 10 | Explain how the study size was arrived at                                                                                                                                            | 6   | Details are provided in the study protocol. |

Continued on next page

|                        |     |                                                                                                                                                                                                                    |      |
|------------------------|-----|--------------------------------------------------------------------------------------------------------------------------------------------------------------------------------------------------------------------|------|
| Quantitative variables | 11  | Explain how quantitative variables were handled in the analyses. If applicable, describe which groupings were chosen and why                                                                                       | 7-8  |
| Statistical methods    | 12  | (a) Describe all statistical methods, including those used to control for confounding                                                                                                                              | 7-8  |
|                        |     | (b) Describe any methods used to examine subgroups and interactions                                                                                                                                                | NA   |
|                        |     | (c) Explain how missing data were addressed                                                                                                                                                                        | NA   |
|                        |     | (d) <i>Cohort study</i> —If applicable, explain how loss to follow-up was addressed                                                                                                                                | 7-8  |
|                        |     | <i>Case-control study</i> —If applicable, explain how matching of cases and controls was addressed<br><i>Cross-sectional study</i> —If applicable, describe analytical methods taking account of sampling strategy |      |
|                        |     | (e) Describe any sensitivity analyses                                                                                                                                                                              | NA   |
| <b>Results</b>         |     |                                                                                                                                                                                                                    |      |
| Participants           | 13* | (a) Report numbers of individuals at each stage of study—eg numbers potentially eligible, examined for eligibility, confirmed eligible, included in the study, completing follow-up, and analysed                  | 6    |
|                        |     | (b) Give reasons for non-participation at each stage                                                                                                                                                               | 6    |
|                        |     | (c) Consider use of a flow diagram                                                                                                                                                                                 | NA   |
| Descriptive data       | 14* | (a) Give characteristics of study participants (eg demographic, clinical, social) and information on exposures and potential confounders                                                                           | 6, 9 |
|                        |     | (b) Indicate number of participants with missing data for each variable of interest                                                                                                                                | 6-7  |
|                        |     | (c) <i>Cohort study</i> —Summarise follow-up time (eg, average and total amount)                                                                                                                                   |      |
| Outcome data           | 15* | <i>Cohort study</i> —Report numbers of outcome events or summary measures over time                                                                                                                                |      |
|                        |     | <i>Case-control study</i> —Report numbers in each exposure category, or summary measures of exposure                                                                                                               |      |
|                        |     | <i>Cross-sectional study</i> —Report numbers of outcome events or summary measures                                                                                                                                 | 9    |
| Main results           | 16  | (a) Give unadjusted estimates and, if applicable, confounder-adjusted estimates and their precision (eg, 95% confidence interval). Make clear which confounders were adjusted for and why they were included       | 9    |
|                        |     | (b) Report category boundaries when continuous variables were categorized                                                                                                                                          | NA   |
|                        |     | (c) If relevant, consider translating estimates of relative risk into absolute risk for a meaningful time period                                                                                                   | NA   |

Continued on next page

|                          |    |                                                                                                                                                                            |       |
|--------------------------|----|----------------------------------------------------------------------------------------------------------------------------------------------------------------------------|-------|
| Other analyses           | 17 | Report other analyses done—eg analyses of subgroups and interactions, and sensitivity analyses                                                                             | 9     |
| <b>Discussion</b>        |    |                                                                                                                                                                            |       |
| Key results              | 18 | Summarise key results with reference to study objectives                                                                                                                   | 11    |
| Limitations              | 19 | Discuss limitations of the study, taking into account sources of potential bias or imprecision. Discuss both direction and magnitude of any potential bias                 | 12-13 |
| Interpretation           | 20 | Give a cautious overall interpretation of results considering objectives, limitations, multiplicity of analyses, results from similar studies, and other relevant evidence | 13    |
| Generalisability         | 21 | Discuss the generalisability (external validity) of the study results                                                                                                      | 13    |
| <b>Other information</b> |    |                                                                                                                                                                            |       |
| Funding                  | 22 | Give the source of funding and the role of the funders for the present study and, if applicable, for the original study on which the present article is based              | 14    |

\*Give information separately for cases and controls in case-control studies and, if applicable, for exposed and unexposed groups in cohort and cross-sectional studies.

**Note:** An Explanation and Elaboration article discusses each checklist item and gives methodological background and published examples of transparent reporting. The STROBE checklist is best used in conjunction with this article (freely available on the Web sites of PLoS Medicine at <http://www.plosmedicine.org/>, Annals of Internal Medicine at <http://www.annals.org/>, and Epidemiology at <http://www.epidem.com/>). Information on the STROBE Initiative is available at [www.strobe-statement.org](http://www.strobe-statement.org).

# BMJ Open

## Variation in SARS-CoV-2 seroprevalence across districts, schools and classes: baseline measurements from a cohort of primary and secondary school children in Switzerland

|                                 |                                                                                                                                                                                                                                                                                                                                                                                                                                                                                                                                                                                                                                                                                                                                                                                                                                                                                                                                                                                                                                                                                                                                                                                                                                                                                                                                                                                                                                                                                                                                                                                                                                                                         |
|---------------------------------|-------------------------------------------------------------------------------------------------------------------------------------------------------------------------------------------------------------------------------------------------------------------------------------------------------------------------------------------------------------------------------------------------------------------------------------------------------------------------------------------------------------------------------------------------------------------------------------------------------------------------------------------------------------------------------------------------------------------------------------------------------------------------------------------------------------------------------------------------------------------------------------------------------------------------------------------------------------------------------------------------------------------------------------------------------------------------------------------------------------------------------------------------------------------------------------------------------------------------------------------------------------------------------------------------------------------------------------------------------------------------------------------------------------------------------------------------------------------------------------------------------------------------------------------------------------------------------------------------------------------------------------------------------------------------|
| Journal:                        | <i>BMJ Open</i>                                                                                                                                                                                                                                                                                                                                                                                                                                                                                                                                                                                                                                                                                                                                                                                                                                                                                                                                                                                                                                                                                                                                                                                                                                                                                                                                                                                                                                                                                                                                                                                                                                                         |
| Manuscript ID                   | bmjopen-2020-047483.R2                                                                                                                                                                                                                                                                                                                                                                                                                                                                                                                                                                                                                                                                                                                                                                                                                                                                                                                                                                                                                                                                                                                                                                                                                                                                                                                                                                                                                                                                                                                                                                                                                                                  |
| Article Type:                   | Original research                                                                                                                                                                                                                                                                                                                                                                                                                                                                                                                                                                                                                                                                                                                                                                                                                                                                                                                                                                                                                                                                                                                                                                                                                                                                                                                                                                                                                                                                                                                                                                                                                                                       |
| Date Submitted by the Author:   | 27-Apr-2021                                                                                                                                                                                                                                                                                                                                                                                                                                                                                                                                                                                                                                                                                                                                                                                                                                                                                                                                                                                                                                                                                                                                                                                                                                                                                                                                                                                                                                                                                                                                                                                                                                                             |
| Complete List of Authors:       | <p>Ulyte, Agne; University of Zurich, Epidemiology, Biostatistics and Prevention Institute (EBPI)</p> <p>Radtke, Thomas; University of Zurich, Epidemiology, Biostatistics and Prevention Institute (EBPI)</p> <p>Abela, Irene; University of Zurich, Institute of Medical Virology; University Hospital Zurich Division of Infectious Diseases and Hospital Epidemiology</p> <p>Haile, Sarah; University of Zurich, Epidemiology, Biostatistics and Prevention Institute (EBPI)</p> <p>Blankenberger, Jacob; University of Zurich, Epidemiology, Biostatistics and Prevention Institute (EBPI)</p> <p>Jung, Ruedi; University of Zurich, Epidemiology, Biostatistics and Prevention Institute (EBPI)</p> <p>Capelli, Celine; University of Zurich, Epidemiology, Biostatistics and Prevention Institute (EBPI)</p> <p>Berger, Christoph; University Children's Hospital Zürich</p> <p>Frei, Anja; University of Zurich, Epidemiology, Biostatistics and Prevention Institute (EBPI)</p> <p>Huber, Michael; University of Zurich, Institute of Medical Virology;</p> <p>Schanz, Merle; University of Zurich, Institute of Medical Virology</p> <p>Schwarzmueller, Magdalena; University of Zurich, Institute of Medical Virology</p> <p>Trkola, Alexandra; University of Zurich, Institute of Medical Virology</p> <p>Fehr, Jan; University Hospital Zurich, Division of Infectious Diseases &amp; Hospital Epidemiology; University of Zurich, Epidemiology, Biostatistics and Prevention Institute (EBPI)</p> <p>Puhan, Milo; University of Zurich, Institute of Epidemiology, Biostatistics &amp; Prevention (EBPI)</p> <p>Kriemler, Susi; University of Zurich,</p> |
| <b>Primary Subject Heading</b>: | Epidemiology                                                                                                                                                                                                                                                                                                                                                                                                                                                                                                                                                                                                                                                                                                                                                                                                                                                                                                                                                                                                                                                                                                                                                                                                                                                                                                                                                                                                                                                                                                                                                                                                                                                            |
| Secondary Subject Heading:      | Infectious diseases, Public health, Paediatrics                                                                                                                                                                                                                                                                                                                                                                                                                                                                                                                                                                                                                                                                                                                                                                                                                                                                                                                                                                                                                                                                                                                                                                                                                                                                                                                                                                                                                                                                                                                                                                                                                         |
| Keywords:                       | Paediatric infectious disease & immunisation < PAEDIATRICS, Infection control < INFECTIOUS DISEASES, Epidemiology < INFECTIOUS DISEASES, VIROLOGY, Community child health < PAEDIATRICS                                                                                                                                                                                                                                                                                                                                                                                                                                                                                                                                                                                                                                                                                                                                                                                                                                                                                                                                                                                                                                                                                                                                                                                                                                                                                                                                                                                                                                                                                 |

1  
2  
3  
4  
5  
6  
7  
8  
9  
10  
11  
12  
13  
14  
15  
16  
17  
18  
19  
20  
21  
22  
23  
24  
25  
26  
27  
28  
29  
30  
31  
32  
33  
34  
35  
36  
37  
38  
39  
40  
41  
42  
43  
44  
45  
46  
47  
48  
49  
50  
51  
52  
53  
54  
55  
56  
57  
58  
59  
60

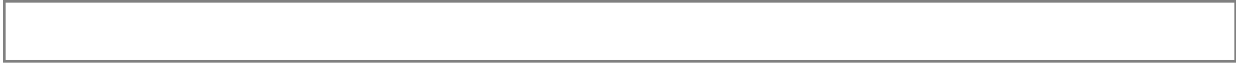

SCHOLARONE™  
Manuscripts



I, the Submitting Author has the right to grant and does grant on behalf of all authors of the Work (as defined in the below author licence), an exclusive licence and/or a non-exclusive licence for contributions from authors who are: i) UK Crown employees; ii) where BMJ has agreed a CC-BY licence shall apply, and/or iii) in accordance with the terms applicable for US Federal Government officers or employees acting as part of their official duties; on a worldwide, perpetual, irrevocable, royalty-free basis to BMJ Publishing Group Ltd ("BMJ") its licensees and where the relevant Journal is co-owned by BMJ to the co-owners of the Journal, to publish the Work in this journal and any other BMJ products and to exploit all rights, as set out in our [licence](#).

The Submitting Author accepts and understands that any supply made under these terms is made by BMJ to the Submitting Author unless you are acting as an employee on behalf of your employer or a postgraduate student of an affiliated institution which is paying any applicable article publishing charge ("APC") for Open Access articles. Where the Submitting Author wishes to make the Work available on an Open Access basis (and intends to pay the relevant APC), the terms of reuse of such Open Access shall be governed by a Creative Commons licence – details of these licences and which [Creative Commons](#) licence will apply to this Work are set out in our licence referred to above.

Other than as permitted in any relevant BMJ Author's Self Archiving Policies, I confirm this Work has not been accepted for publication elsewhere, is not being considered for publication elsewhere and does not duplicate material already published. I confirm all authors consent to publication of this Work and authorise the granting of this licence.



**Title**

Variation in SARS-CoV-2 seroprevalence across districts, schools and classes: baseline measurements from a cohort of primary and secondary school children in Switzerland

**Authors**

Agne Ulyte\*, researcher, Thomas Radtke\*, senior researcher, Irene A. Abela\*, researcher, Sarah R. Haile, senior statistician, Jacob Blankenberger, master student, Ruedi Jung, researcher, Céline Capelli, master student, Christoph Berger, professor, Anja Frei, senior researcher, Michael Huber, researcher, Merle Schanz, researcher, Magdalena Schwarzmüller, doctoral student, Alexandra Trkola#, professor, Jan Fehr#, professor, Milo A. Puhon#, professor, Susi Kriemler\$#, professor

\* shared first authorship

# shared last authorship

**Corresponding author:**

Susi Kriemler

Tel: +41 44 634 63 20

susi.kriemlerwiget@uzh.ch

Epidemiology, Biostatistics and Prevention Institute (EBPI), University of Zurich

Hirschengraben 84

8001 Zürich, Switzerland

**Agne Ulyte**, [agne.ulyte@uzh.ch](mailto:agne.ulyte@uzh.ch), Epidemiology, Biostatistics and Prevention Institute (EBPI), University of Zurich, Hirschengraben 84, 8001 Zürich, Switzerland

**Thomas Radtke**, [thomas.radtke@uzh.ch](mailto:thomas.radtke@uzh.ch), Epidemiology, Biostatistics and Prevention Institute (EBPI), University of Zurich, Hirschengraben 84, 8001 Zürich, Switzerland

**Irene A. Abela**, [irene.abela@virology.uzh.ch](mailto:irene.abela@virology.uzh.ch), Institute of Medical Virology, University of Zurich, Winterthurerstrasse 190, 8057 Zürich, Switzerland; Division of Infectious Diseases & Hospital Epidemiology, University Hospital Zurich, Rämistrasse 100, 8091 Zürich, Switzerland

**Sarah R. Haile**, [sarah.haile@uzh.ch](mailto:sarah.haile@uzh.ch), Epidemiology, Biostatistics and Prevention Institute (EBPI), University of Zurich, Hirschengraben 84, 8001 Zürich, Switzerland

**Jacob Blankenberger**, [jacob.blankenberger@uzh.ch](mailto:jacob.blankenberger@uzh.ch), Epidemiology, Biostatistics and Prevention Institute (EBPI), University of Zurich, Hirschengraben 84, 8001 Zürich, Switzerland

- 1  
2  
3  
4  
5  
6  
7  
8  
9  
10  
11  
12  
13  
14  
15  
16  
17  
18  
19  
20  
21  
22  
23  
24  
25  
26  
27  
28  
29  
30  
31  
32  
33  
34  
35  
36  
37  
38  
39  
40  
41  
42  
43  
44  
45  
46  
47  
48  
49  
50  
51  
52  
53  
54  
55  
56  
57  
58  
59  
60  
61
- Ruedi Jung**, [ruedi.jung@uzh.ch](mailto:ruedi.jung@uzh.ch), Epidemiology, Biostatistics and Prevention Institute (EBPI), University of Zurich, Hirschengraben 84, 8001 Zürich, Switzerland
- Céline Capelli**, [celine.capelli@uzh.ch](mailto:celine.capelli@uzh.ch), Epidemiology, Biostatistics and Prevention Institute (EBPI), University of Zurich, Hirschengraben 84, 8001 Zürich, Switzerland
- Christoph Berger**, [Christoph.Berger@kispi.uzh.ch](mailto:Christoph.Berger@kispi.uzh.ch), University Children Hospital Zurich, Steinwiesstrasse 75, 8032 Zürich, Switzerland
- Anja Frei**, [anja.frei@uzh.ch](mailto:anja.frei@uzh.ch), Epidemiology, Biostatistics and Prevention Institute (EBPI), University of Zurich, Hirschengraben 84, 8001 Zürich, Switzerland
- Michael Huber**, [huber.michael@virology.uzh.ch](mailto:huber.michael@virology.uzh.ch), Institute of Medical Virology, University of Zurich, Winterthurerstrasse 190, 8057 Zürich, Switzerland
- Merle Schanz**, [schanz.merle@virology.uzh.ch](mailto:schanz.merle@virology.uzh.ch), Institute of Medical Virology, University of Zurich, Winterthurerstrasse 190, 8057 Zürich, Switzerland
- Magdalena Schwarzmüller**, [schwarzmuller.magdalena@virology.uzh.ch](mailto:schwarzmuller.magdalena@virology.uzh.ch), Institute of Medical Virology, University of Zurich, Winterthurerstrasse 190, 8057 Zürich, Switzerland
- Alexandra Trkola**, [trkola.alexandra@virology.uzh.ch](mailto:trkola.alexandra@virology.uzh.ch), Institute of Medical Virology, University of Zurich, Winterthurerstrasse 190, 8057 Zürich, Switzerland
- Jan Fehr**, [jan.fehr@uzh.ch](mailto:jan.fehr@uzh.ch), Epidemiology, Biostatistics and Prevention Institute (EBPI), University of Zurich, Hirschengraben 84, 8001 Zürich; Division of Infectious Diseases & Hospital Epidemiology, University Hospital Zurich, Rämistrasse 100, 8091 Zurich, Switzerland
- Milo A. Puhan**, [miloalan.puhan@uzh.ch](mailto:miloalan.puhan@uzh.ch), Epidemiology, Biostatistics and Prevention Institute (EBPI), University of Zurich, Hirschengraben 84, 8001 Zürich, Switzerland
- Susi Kriemler**, [susi.kriemlerwiget@uzh.ch](mailto:susi.kriemlerwiget@uzh.ch), Epidemiology, Biostatistics and Prevention Institute (EBPI), University of Zurich, Hirschengraben 84, 8001 Zürich, Switzerland

Word count: 3200

**62 Abstract**

63 **Objectives:** To determine the variation in SARS-CoV-2 seroprevalence in school children, and  
64 the relationship with self-reported symptoms.

65 **Design:** Baseline measurements of a longitudinal cohort study (*Ciao Corona*) from June-July  
66 2020.

67 **Setting:** 55 schools stratified by district in the canton of Zurich, Switzerland.

68 **Participants:** 2585 children (1339 girls, median age 11, age range 6-16 years), attending  
69 grades 1-2, 4-5 and 7-8.

70 **Main outcome measures:** Variation in seroprevalence of SARS-CoV-2 in children across 12  
71 cantonal districts, schools, and grades, assessed with Luminex-based test of four epitopes  
72 for IgG, IgA and IgM (ABCORA 2.0). Clustering of cases within classes. Association of  
73 seropositivity and symptoms. Comparison with seroprevalence in adult population, assessed  
74 with Luminex-based test of IgG and IgA (SenASTriS).

75 **Results:** Overall seroprevalence was 2.8% (95% CI 1.5 to 4.1%), ranging from 1.0% to 4.5%  
76 across districts. Seroprevalence in grades 1-2 was 3.8% (2.0 to 6.1%), in grades 4-5 – 2.4%  
77 (1.1 to 4.2%), and in grades 7-8 – 1.5% (0.5 to 3.0%). At least one seropositive child was  
78 present in 36 of 55 (65%) schools and in 44 (34%) of 131 classes where  $\geq 5$  children and  $\geq 50\%$   
79 of children within the class were tested. 73% of children reported COVID-19-compatible  
80 symptoms since January 2020, with the same frequency in seropositive and seronegative  
81 children for all symptoms. Seroprevalence of children and adults was similar (3.2%, 95% CrI  
82 1.7-5.0%, versus 3.6%, 95% CrI 1.7-5.4%). The ratio of confirmed SARS-CoV-2 cumulative  
83 incidence to seropositive cases was 1:89 in children and 1:12 in adults.

84 **Conclusions:** SARS-CoV-2 seroprevalence was low in children and similar to that in adults by  
85 the end of June 2020. Very low ratio of diagnosed to seropositive children was observed.  
86 We did not detect clustering of SARS-CoV-2 seropositive children within classes, but the  
87 follow-up of this study will shed more light on transmission within schools.

88 **Trial registration:** ClinicalTrials.gov NCT04448717.  
89 <https://clinicaltrials.gov/ct2/show/NCT04448717>

90 **Key words:** SARS-CoV-2, COVID-19, children, adolescents, school.

91

92 **Article summary**

93

94 **Strengths and limitations of this study**

- 95 • This study presents the results of a regionally representative cohort of children,  
96 randomly selected on school and class levels, and thus, allowing the analysis of  
97 clustering of cases within classes and schools.
- 98 • This cross-sectional analysis estimates the seroprevalence in children in June-July in  
99 Switzerland, from a period when there is very little evidence about SARS-CoV-2  
100 seroprevalence in children globally.
- 101 • Serological test with high sensitivity and specificity was used, and Bayesian  
102 hierarchical models were applied to estimate seroprevalence, adjusting for test  
103 accuracy parameters.
- 104 • Self-reported symptoms might be subject to recall-bias, particularly when reporting  
105 retrospectively for a period of over six months.

106

107

**108 INTRODUCTION**

109 The transmission of severe acute respiratory syndrome coronavirus 2 (SARS-CoV-2) in the  
110 school setting is not well understood [1], partly as schools were closed in many countries  
111 during the peaks of the pandemic, partly due to lack of representative studies with random  
112 sampling. Anecdotal evidence and case studies suggest that outbreaks can happen in  
113 schools [2–4], but it is not clear if they represent outlier events or widely underdiagnosed  
114 spread of the infection. The effect of school closures on the community transmission of  
115 SARS-CoV-2 ranges from minimal to substantial [5], with some modelling studies even  
116 predicting an increase of the total number of deaths [6]. Currently existing or planned  
117 population-based studies focusing on SARS-CoV-2 spread in schools are few and small-sized  
118 [7,8].

119 In this study, we present the results of the first cross-sectional analysis of a large  
120 cohort of children from randomly selected schools and classes in the canton of Zurich,  
121 Switzerland. The cohort study follows the seroprevalence, symptoms, socio-demographic  
122 and lifestyle factors of enrolled children from June 2020 to April 2021. The participating  
123 children were enrolled from June 16 to July 9, 2020. Schools in Switzerland were closed for a  
124 relatively short period (March 16 to May 10) compared to other countries, and lock-down  
125 measures were mild. Restaurants, bars and non-essential shops and services were closed on  
126 March 17 and events or meetings with over 5 people prohibited on March 20, but no strict  
127 confinement at home implemented. These measures were gradually lifted in April-May  
128 2020.

129 The aim of this analysis is to present the overall estimate of seroprevalence in  
130 children and its variation across districts, schools, grades and classes, the association of  
131 seroprevalence with self-reported symptoms, and the clustering of seropositive children  
132 within classes.

133

134

## 135 METHODS

### 136 *Study setting*

137 The study was registered on ClinicalTrials.gov (identifier number NCT04448717). The  
138 protocol for this longitudinal cohort study was reported elsewhere [9]. The study is part of a  
139 large nationally coordinated research network *Corona Immunitas* in Switzerland [10,11].  
140 The study took place from June 16 to July 9, 2020, in the canton of Zurich, Switzerland. The  
141 canton of Zurich comprises 1.5 million residents, roughly 18% of the Swiss population, and  
142 includes both urban and rural settings, as well as an ethnically and linguistically diverse  
143 population. The first preventive measures in schools were introduced on March 16, 2020,  
144 when physical attendance of schools was stopped. Schools were partly reopened on May  
145 10, with a combination of online and on-site teaching with preventive measures (e.g.,  
146 teaching in smaller groups, school attendance every second day, sports and large group  
147 activities limited). Schools were fully reopened on June 7, with minimal preventive measures  
148 (e.g., recommended social distancing for teachers, reduction of group events) and otherwise  
149 regular operation (e.g., full classrooms with desks mostly facing forward) until the end of the  
150 school year on July 17. The prevention measures implemented in schools after May 10 were  
151 school-specific and based on the federal and cantonal guidelines [12].

152

### 153 *Study procedures*

154 School were selected based on a full list of schools provided by the Educational Department  
155 of the canton. Primary schools were randomly selected by a computer program from the list  
156 of all primary schools in the respective district. The closest secondary school (often in the  
157 same building or area) was then selected. The random sample of primary and secondary  
158 schools was stratified by geographic district. Within schools, randomly selected classes in  
159 lower school level (grades one to two, attended by 6 to 9-year-old children), middle (grades  
160 four to five, 9 to 13-year-old children), and upper school level (grades seven to eight, 12 to  
161 16-year-old children) were invited. Invited grades and classes were selected to ensure that  
162 the same cohort of children within the class can be followed until April 2021. Therefore,  
163 grades 1-2, 4-5 and 7-8 (but not grades 3, 6, and 9) were included, as they normally stay in  
164 the same school and class for the next school-year. We aimed to enroll at least three classes  
165 and 40 children per school level. As we were only able to test the children at schools, a  
166 major exclusion criterion was a suspected or confirmed infection with SARS-CoV-2 in the  
167 given child on the testing date, precluding attendance of school.

168 Study information, link to study website ([www.ciao-corona.ch](http://www.ciao-corona.ch)), and informational  
169 videos in multiple languages for schools, parents, and children were sent to school principals  
170 and further to families of children from the selected classes. Children were enrolled and  
171 venous blood samples taken in schools between June 16 and July 9, 2020. Questionnaires  
172 with information on socio-demographics and symptoms compatible with SARS-CoV-2  
173 infection from January to June, 2020, were completed online for the majority of children by  
174 their parents in June-July, 2020 (for 3% of children in August-September).

175 In total, 55 out of 156 invited primary and secondary schools agreed to participate,  
176 and 2585 children in 273 out of 274 invited classes (no children participated in one class).  
177 Venous blood samples were collected from 2484 children (a sufficient amount of blood  
178 could not be obtained from 101 children). An online questionnaire, containing socio-  
179 demographic, health, symptoms and quality of life information for the children, and socio-  
180 demographic and symptoms information for the household members, was completed for  
181 2288 of all enrolled children. Questionnaires were not filled for 297 children, after several  
182 email and phone call reminders.

183

#### 184 **Serological tests**

185 The primary outcome of the study was the serological results of blood serum samples  
186 analyzed with ABCORA 2.0 binding assay of the Institute of Medical Virology (IMV) of the  
187 University of Zurich based on the Luminex technology [13]. The test analyzes  
188 immunoglobulins G (IgG), M (IgM) and A (IgA) against four SARS-CoV-2 targets (receptor  
189 binding domain (RBD), spike proteins S1 and S2, and the nucleocapsid protein (N), yielding  
190 12 different measurements. Cut-off values were established against pre-pandemic plasma  
191 allowing a high sensitivity (93.3%) and specificity (99.6%). Samples were defined as  
192 seropositive for SARS-CoV-2 if at least two of the 12 parameters were above the cut-off.

193 SARS-CoV-2 seroprevalence in children was compared to that estimated in a random  
194 sample from the general population, adjusting for age group and sex, in the same region in  
195 June-July 2020. The adult study, like all studies of the Swiss-wide research program *Corona*  
196 *Immunitas* [10,11], used the test SenASTrIS (Sensitive Anti-SARS-CoV-2 Spike Trimer  
197 Immunoglobulin Serological) developed by the Centre Hospitalier Universitaire Vaudois  
198 (CHUV), the Swiss Federal Institute of Technology in Lausanne (EPFL) and the Swiss Vaccine  
199 Center [14]. The test also uses Luminex technology to detect IgG and IgA antibodies binding  
200 to the entire trimeric S protein of SARS-CoV-2 and with demonstrated 98.3% sensitivity and  
201 98.4% specificity for the combined testing of IgG and IgA (result declared as positive when



202 either or both were positive) [14]. In order to compare the seroprevalence estimates in  
203 children and adult cohorts, blood serum samples of 2476 children were also analyzed with  
204 the SenASTrIS test (samples were insufficient for analysis with the second test for 8  
205 children) and compared to a random population sample of 857 adults who took part in the  
206 second phase of the Switzerland-wide *Corona Immunitas* research program [11].

207 Seroprevalence was also compared to the cumulative incidence of reverse  
208 transcription polymerase chain reaction (RT-PCR)-confirmed SARS-CoV-2 infections in adults  
209 and children, based on official statistics up to the beginning of June [15].

210

### 211 **Statistical analysis**

212 Statistical analysis included descriptive statistics and Bayesian hierarchical modelling to  
213 estimate seroprevalence [16]. The Bayesian approach allowed to account for the sensitivity  
214 and specificity of the SARS-CoV-2 antibody test and the hierarchical structure of cohort  
215 (individual and school levels). The model (Bayesian logistic regression) was adjusted for  
216 participants' sex, grade, and geographic district of the school, and included random effects  
217 for school levels (lower, middle and upper). In order to compute an estimate representative  
218 for the population of the canton of Zurich, we applied post-stratification weights, which  
219 adjusted for the total population size of the specific school level and the geographic district.  
220 The model and weighing procedure are described in detail in Appendix 1.

221 The factor of confirmed to total infections was calculated as the ratio of RT-PCR-  
222 confirmed cumulative incidence by the end of June 2020 and the estimated seroprevalence.  
223 We assessed the clustering of seropositive children within classes, school levels, and schools  
224 by studying the distribution of classes with zero, one, or more seropositive children. As the  
225 probability of detecting a seropositive child increases with more children tested, we  
226 separately assessed the proportion of classes with at least one seropositive child among all  
227 class and among classes with  $\geq 5$  participating children and  $\geq 50\%$  of children participating  
228 from the class.

229

### 230 **Patient and public involvement**

231 Several school principals were consulted during the development of the protocol to ensure  
232 feasibility of the planned study procedures. Early feedback was collected from invited  
233 children and parents, in order to adapt the communication strategies and channels.  
234 Numerous online informational sessions, encouraging open exchange and feedback, were  
235 organized for invited and enrolled school principals, personnel and parents of the children.



1 236 Results of individual tests were communicated to the participants, and overall study results  
2 237 disseminated to participating schools. Findings will be disseminated in lay language in the  
3  
4 238 national and local press, to the national and regional educational and public health  
5  
6 239 departments and on the website of the study ([www.ciao-corona.ch](http://www.ciao-corona.ch)).  
7  
8 240  
9  
10  
11  
12  
13  
14  
15  
16  
17  
18  
19  
20  
21  
22  
23  
24  
25  
26  
27  
28  
29  
30  
31  
32  
33  
34  
35  
36  
37  
38  
39  
40  
41  
42  
43  
44  
45  
46  
47  
48  
49  
50  
51  
52  
53  
54  
55  
56  
57  
58  
59  
60

For peer review only

## 241 RESULTS

242 In total, 55 schools and 2585 children were recruited (1339 (52%) girls, median age 11, age  
243 range 6-16 years), 754 (29%) in the lower level, 899 (35%) in the middle, and 932 (36%) in  
244 the upper school level. Mean participation rate was 50% of the invited children within  
245 invited classes (range from 0% to 94% (0 to 21 children), interquartile range 32% to 63%).  
246 Venous blood was collected and analyzed for 2484 children (1278 (51%) girls, median age  
247 11, age range 6 to 16 years).

248 74 children had SARS-CoV-2 antibodies, resulting in overall weighted seroprevalence  
249 of 2.8 % (95% credible interval (CrI) 1.5 to 4.1%), ranging from 1.0% to 4.5% in districts, as  
250 measured with ABCORA test (Figure 1). Seroprevalence was 3.8% (95% CrI 2.0 to 6.1%) in  
251 grades one to two, 2.4% (95% CrI 1.1 to 4.2%) in grades four to five, and 1.5% (95% CrI 0.5 to  
252 3.0%) in grades seven to eight (Figure 1).

253 Seroprevalence of children, as measured with the SenASTriS test of IgG and IgA  
254 combined, was very similar to the seroprevalence of randomly selected adults in the same  
255 region in June-July 2020 (children 3.2%, 95% CrI 1.7 to 5.0%, versus adults 3.6%, 95% CrI 1.7  
256 to 5.4%). The estimates of seroprevalence in different school levels and districts were  
257 somewhat different from those estimated with the primary ABCORA 2.0 test (Figure 1);  
258 however, the credible intervals of the estimates overlapped. Seroprevalence measured with  
259 SenASTriS test was 2.0% (95% CrI 0.6 to 4.3%) in grades one to two, 4.2% (95% CrI 2.1 to  
260 6.8%) in grades four to five, and 3.3% (95% CrI 1.4 to 5.6%) in grades seven to eight.

261 Based on the cumulative incidence of SARS-CoV-2 RT-PCR-confirmed cases by the  
262 end of June (0.03% for children and 0.24% for adult populations), the ratio of confirmed  
263 infections to seropositive cases in children was one to 89, compared to a ratio of one to 12  
264 in the adult population.

265

266 **Figure 1** Overall, school level and district estimates of SARS-CoV-2 seroprevalence in  
267 children

268 Weighted point estimates and 95% credible intervals are shown. Districts are ordered by population size.  
269 ABCORA 2.0 – Primary estimate based on the ABCORA 2.0 of the Institute of Medical Virology, University  
270 of Zurich test.

271 SenASTriS – Estimate based on the SenASTriS test.

272

273 At least one seropositive child was present in 36/55 (65%) of tested schools. Within the  
274 levels of the schools, at least one seropositive child was present in the lower level of 17/29  
275 (59%) schools, in the middle level of 14/28 (50%) schools, and in the upper level of 16/25  
276 (64%) schools (Figure 2).

277 **Figure 2** Seropositive children in tested schools and school levels

278 Each square illustrates an invited child. Each block of squares illustrates a school level in a school. Lower  
279 and middle levels are both taught in the primary schools; however, lower and middle levels of the same  
280 school are not matched in this graph due to protection of participant privacy. The distribution of the  
281 invited, tested and seropositive children is depicted only on the school level in the figures of this  
282 manuscript to preserve deidentification and privacy of the participants.

283

284 No sex differences in seroprevalence were noted (2.8% (95% CrI 1.6 to 4.1%) in girls  
285 and 2.7% (95% CrI 1.5 to 4.0%) in boys). 73% of children reported any SARS-CoV-2  
286 compatible symptoms, such as cough, fever, fatigue or diarrhea (see Figure 3 for the full  
287 list), between January and June 2020. None of the symptoms was more frequent in  
288 seropositive than in seronegative children (Figure 3).

289

290 **Figure 3** Self-reported symptoms in seropositive and seronegative children in January-June  
291 2020

292 Point estimates and 95% confidence intervals are shown.

293

294 At least one seropositive child was present in 34% (44/131) of classes where  $\geq 5$   
295 children and  $\geq 50\%$  of children within the class were tested (Figure 4). Among the classes  
296 with at least one seropositive child, 38 (86%) had only one, 4 (9%) had two and 2 (5%) had  
297 three seropositive children. When considering all classes regardless of participation rate,  
298 24% (65/273) of classes had at least one seropositive child.

299

300 **Figure 4** Clustering of seropositive children in classes: number and proportion of

301 seropositive children in the tested classes

302 Each dot represents a class. Diagonal lines partition the figure into classes with 0-5% of tested  
303 seropositive children (below 5% line), 5-10% of tested seropositive children (between 5% and 10% lines),  
304 etc. Only classes where at least 5 children and at least 50% of the class were tested are shown. The  
305 distribution of seropositive children in the enrolled classes is only presented in an aggregated form rather  
306 than clustered within schools to preserve the deidentification and privacy of the participants.

307

**DISCUSSION**

1  
2  
3  
4  
5  
6  
7  
8  
9  
10  
11  
12  
13  
14  
15  
16  
17  
18  
19  
20  
21  
22  
23  
24  
25  
26  
27  
28  
29  
30  
31  
32  
33  
34  
35  
36  
37  
38  
39  
40  
41  
42  
43  
44  
45  
46  
47  
48  
49  
50  
51  
52

309 **DISCUSSION**  
310 In this study of randomly sampled schools and classes, we found variation in seroprevalence  
311 in 6 to 16-year-old children across districts, schools and classes by July 2020, but no  
312 indication of major transmission and outbreaks within classes and schools. The overall  
313 seroprevalence was not different from a randomly selected adult population living in the  
314 same region – pointing to striking underdiagnosis of SARS-CoV-2 infection in children, with  
315 only one in 89 cases diagnosed. Contrary to studies of symptomatic infections [17] and  
316 some other population-based studies of seroprevalence [16,18], there was a trend of higher  
317 seroprevalence in younger children as measured with the main ABCORA test (the trend was  
318 not present in seroprevalence estimated based on SenASTriS test). The presence of  
319 symptoms was very common (three of four children reported one or several symptoms  
320 compatible with a COVID-19 infection) and importantly not specific to the seropositive  
321 children. Although no outbreaks were reported in schools at the time of testing in the  
322 canton of Zurich (comprising 18% of the Swiss population), seropositive children were  
323 detected in more than half of the tested schools and a third of all tested classes. However,  
324 the vast majority of classes with seropositive children had only a single seropositive child  
325 among the tested children, reflecting low prevalence and no significant clustering within  
326 classes after the re-opening of the schools.

327 By the time of conducting this study, there were few studies focusing on SARS-CoV-2  
328 spread in schools [18–20]. Most of the reported evidence consisted of cases studies of  
329 outbreaks in specific schools or reports of contact tracing of index cases in educational  
330 settings. Most of the studies reported low secondary attack rates in schools [4,21] but also  
331 some conflicting observations of outbreaks [2,22]. Although some studies of seroprevalence  
332 had included children [16,23,24], they mostly focused on households and the general  
333 population. The management of SARS-CoV-2 transmission in schools was therefore highly  
334 debated [25,26]. The present study is unique as one of the first major studies reporting  
335 variation in seroprevalence in children from randomly selected schools in a country where  
336 the general lock-down on a population level was mild and short (one month), and school  
337 closure lasted only for two months.

338 Although manifest clinical disease of COVID-19 is much less prevalent in children  
339 than in adults [17,27,28] and preliminary evidence points to lower susceptibility of children  
340 compared to adults [18], our results indicate very similar seroprevalence in adults and  
341 children. Similar seroprevalence in adults and school-aged children was found in another  
342 region in Switzerland in April [16] and in November 2020 [29]. Intriguingly, we observed a

1 343 not statistically significant trend of younger children having higher seroprevalence than  
2 344 older children, when measured with the comprehensive ABCORA 2.0 test. Infections with  
3 345 circulating human coronaviruses (hCoVs) are common in childhood and antibodies to hCoVs  
4 346 229E, NL63, OC43 and HKU1A are prevalent in the human population and particularly  
5 347 children [30,31]. Cross-reactivity with hCoVs was thus considered in the development of  
6 348 both serology tests used in this study and both tests detect SARS-CoV-2 with high specificity  
7 349 (99.6% for ABCORA 2.0 and 98.4% for SenASTriS). Importantly, to adjust for the possibility of  
8 350 a few false-positive results, we employed a Bayesian hierarchical model, which adjusts for  
9 351 the accuracy parameters of the tests to estimate population-level seroprevalence. Higher  
10 352 seroprevalence in younger children could be compatible with less feasible social distancing  
11 353 behavior and possibly more vigorous immune response to the virus in early age. The trend  
12 354 could also reflect a chance finding, as substantial proportion of false positives is expected in  
13 355 the low seroprevalence setting, and it was not observed in the SenASTriS test results.  
14 356 Further testing of the cohort and forthcoming studies will show if this trend is observed in  
15 357 the future.

16 358 The frequency of both more specific (e.g., fever, cough) and less specific (rhinorrhea,  
17 359 headache, nausea) symptoms [32] was not different among seropositive and seronegative  
18 360 children. In general, symptoms, particularly rhinorrhea, cough, headache and sore throat,  
19 361 were reported frequently, with three of four children reporting any symptoms within the  
20 362 last 6 months in both groups. Anosmia was not reported by any of the seropositive children.  
21 363 The specificity of COVID-19 compatible symptoms, therefore, seems to be lower in children  
22 364 than in adults. Moreover, the range of symptoms reported in children was shown to be  
23 365 different than in adults [33]. Somewhat unspecific symptoms in children, contrary to more  
24 366 specific symptoms in adults [34], could partly explain the high proportion of seropositive  
25 367 children who were not previously diagnosed with RT-PCR. Furthermore, testing indications  
26 368 by health authorities were cautious both for children and adults during the first half of 2020.  
27 369 Testing was recommended only for children with acute upper respiratory tract infection  
28 370 symptoms or acute anosmia, and not recommended in children with rhinitis only or without  
29 371 symptoms [35].

30 372 Particular strengths of the design of this study are school-based random sampling,  
31 373 hierarchical data structure, and large sample size, allowing to identify clusters within  
32 374 district, school, grade and class levels. Testing was done in schools and study information  
33 375 presented in multiple formats, including videos in multiple languages, to minimize selection  
34 376 bias within enrolled children. The participation rate of 50% can be considered rather high

1 377 for a study in children involving venous blood sampling, and additional children from the  
2 378 invited classes will have the opportunity to be enrolled in subsequent testing phases  
3  
4 379 (October/November 2020, March/April 2021), further increasing participation rate and the  
5  
6 380 size of the cohort.

7 381 The study has a few limitations. First, the retrospective evaluation of symptoms over  
8  
9 382 six months could have been subject to recall bias. Second, the study enrolled only 35%  
10  
11 383 (55/156) of the invited schools. Commonly stated reasons for non-participation on school  
12  
13 384 level were constraints in time and human resources and competing participation in other  
14  
15 385 studies. Participation rate on school level varied significantly depending on the district, and  
16  
17 386 for a few districts, a maximum of three invitation rounds was needed to recruit a regionally  
18  
19 387 representative sample. Third, although the schools were open for one to two months  
20  
21 388 directly before the study, they were closed for the two months of the highest community  
22  
23 389 transmission of SARS-CoV-2 in the canton of Zurich [15]. Therefore, the measured  
24  
25 390 seroprevalence in children might be dominated by infections in households rather than  
26  
27 391 school. The follow up of this study will shed more light on transmission in schools. Finally,  
28  
29 392 we do not have information on how many eligible children did not attend the testing due to  
30  
31 393 acute infection with SARS-CoV-2. We did not provide testing for such children at home or an  
32  
33 394 alternative date due to limited resources. However, reported total weekly incidence of  
34  
35 395 SARS-CoV-2 infections in the canton of Zurich ranged from 42 to 185 cases (among 1.5  
36  
37 396 million residents), and 7 to 15 cases among people under 20 years old during the testing  
38  
39 397 period. Considering that, in comparison, over 700 total weekly cases were reported in  
40  
41 398 March-April 2020, we believe that excluding acutely infected children during the testing  
42  
43 399 period could not lead to substantial underestimation of the seroprevalence.

44 400 In conclusion, clustering of SARS-CoV-2 seropositive children within classes and  
45  
46 401 schools was not prominent shortly after reopening of schools in this large population-based  
47  
48 402 study. Seroprevalence was similar to adults, resulting in strikingly fewer diagnosed  
49  
50 403 infections in comparison to the seropositive cases in children than in adults. Considering the  
51  
52 404 time window required for SARS-CoV-2 antibodies to form, this study reflects infection of  
53  
54 405 SARS-CoV-2 until approximately end of May 2020, covering four months of SARS-CoV-2  
55  
56 406 infection in the community, with two months of school closure and mild lock-down policy.  
57  
58 407 The subsequent testing of parents and school personnel and the follow-up of the children  
59  
60 408 cohort in fall 2020 will yield further evidence on the observed trends and of the spread of  
409 SARS-CoV-2 within and outside schools.

410

**411 Author Contributions**

1  
2 412 SK and MAP initiated the project and preliminary design, with support of JF. SK, MAP, CB,  
3  
4 413 TR, RJ, JB, AF and AU developed the design and methodology. SK, RJ, AU, TR, JB, AF and CC  
5  
6 414 recruited study participants, collected and managed the data. SRH performed statistical  
7  
8 415 analysis. AT, MH, MaSch, MeSch and IA developed the serology analysis plan, supervised,  
9  
10 416 conducted and evaluated the serology tests. AU wrote the first draft of the manuscript. All  
11  
12 417 authors contributed to the design of the study and interpretation of its results, and revised  
13  
14 418 and approved the manuscript for intellectual content. SK is the guarantor and accepts full  
15  
16 419 responsibility for the work and the conduct of the study, had access to the data, and  
17  
18 420 controlled the decision to publish. The corresponding author SK attests that all listed  
19  
20 421 authors meet authorship criteria and that no others meeting the criteria have been omitted.

21 422

**423 Competing interests**

24 424 The authors declare no competing interests to disclose.

25 425

**426 Funding**

27  
28 427 This study is part of *Corona Immunitas* research network, coordinated by the Swiss School of  
29  
30 428 Public Health (SSPH+), and funded by fundraising of SSPH+ that includes funds of the Swiss  
31  
32 429 Federal Office of Public Health and private funders (ethical guidelines for funding stated by  
33  
34 430 SSPH+ will be respected), by funds of the Cantons of Switzerland (Vaud, Zurich and Basel)  
35  
36 431 and by institutional funds of the Universities. Additional funding, specific to this study is  
37  
38 432 available from the University of Zurich Foundation. The funder/sponsor did not have any  
39  
40 433 role in the design and conduct of the study; collection, management, analysis, and  
41  
42 434 interpretation of the data; preparation, review, or approval of the manuscript; and decision  
43  
44 435 to submit the manuscript for publication. All authors had full access to all data analysis  
45  
46 436 outputs (reports and tables) and take responsibility for their integrity and accuracy

47 437

**438 Data sharing statement**

49  
50 439 Data is still being collected for the cohort study *Ciao Corona*. Deidentified participant data  
51  
52 440 might be available on reasonable request by email to the corresponding author at later  
53  
54 441 stages of the study.

55 442

**443 Ethics approval**



444 The study was approved by the Ethics Committee of the Canton of Zurich, Switzerland  
 445 (2020-01336). All participants provided written informed consent before being enrolled in  
 446 the study.

447

#### 448 **Transparency declaration**

449 The lead authors affirm that the manuscript is an honest, accurate, and transparent account  
 450 of the study being reported, no important aspects of the study have been omitted, and any  
 451 discrepancies from the study as originally planned and registered have been explained.

452

#### 453 **References**

- 454 1 Viner RM, Russell SJ, Croker H, *et al.* School closure and management practices during  
 455 coronavirus outbreaks including COVID-19: a rapid systematic review. *Lancet Child*  
 456 *Adolesc. Heal.* 2020;**4**:397–404. doi:10.1016/S2352-4642(20)30095-X
- 457 2 Stein-Zamir C, Abramson N, Shoob H, *et al.* A large COVID-19 outbreak in a high  
 458 school 10 days after schools' reopening, Israel, May 2020. *Eurosurveillance*  
 459 2020;**25**:2001352. doi:10.2807/1560-7917.ES.2020.25.29.2001352
- 460 3 Lopez AS, Hill M, Antezano J, *et al.* Transmission Dynamics of COVID-19 Outbreaks  
 461 Associated with Child Care Facilities — Salt Lake City, Utah, April–July 2020. *MMWR*  
 462 *Morb Mortal Wkly Rep* 2020;**69**:1319–23. doi:10.15585/mmwr.mm6937e3
- 463 4 Macartney K, Quinn HE, Pillsbury AJ, *et al.* Transmission of SARS-CoV-2 in Australian  
 464 educational settings: a prospective cohort study. *Lancet Child Adolesc Heal* 2020;**0**.  
 465 doi:10.1016/s2352-4642(20)30251-0
- 466 5 Walsh S, Chowdhury A, Russell S, *et al.* Do school closures reduce community  
 467 transmission of COVID-19? A systematic review of observational studies. *medRxiv*  
 468 2021;:2021.01.02.21249146. doi:10.1101/2021.01.02.21249146
- 469 6 Rice K, Wynne B, Martin V, *et al.* Effect of school closures on mortality from  
 470 coronavirus disease 2019: old and new predictions. *BMJ* 2020;**371**:m3588.  
 471 doi:10.1136/bmj.m3588
- 472 7 Ladhani S, Ramsay M, Amirthalingam G, *et al.* COVID-19 Surveillance in Children  
 473 attending preschool, primary and secondary schools. 2020.  
 474 [https://assets.publishing.service.gov.uk/government/uploads/system/uploads/attach](https://assets.publishing.service.gov.uk/government/uploads/system/uploads/attachment_data/file/891762/sKID_protocol_v1.3.pdf)  
 475 [ment\\_data/file/891762/sKID\\_protocol\\_v1.3.pdf](https://assets.publishing.service.gov.uk/government/uploads/system/uploads/attachment_data/file/891762/sKID_protocol_v1.3.pdf)
- 476 8 Armann JP, Unrath M, Kirsten C, *et al.* Anti-SARS-CoV-2 IgG antibodies in adolescent  
 477 students and their teachers in Saxony, Germany (SchoolCoviDD19): very low  
 478 seroprevalence and transmission rates. *medRxiv* 2020;:2020.07.16.20155143.



- 479 doi:10.1101/2020.07.16.20155143
- 1 480 9 Ulyte A, Radtke T, Abela IA, *et al.* Seroprevalence and immunity of SARS-CoV-2  
2 infection in children and adolescents in schools in Switzerland: design for a  
3  
4 481 longitudinal, school-based prospective cohort study. *Int J Public Health* Published  
5  
6 482 Online First: 15 October 2020. doi:10.1007/s00038-020-01495-z  
7  
8 483  
9 484 10 Corona Immunitas: a nationwide program of antibody studies of SARS-CoV-2 in the  
10  
11 485 Swiss population (ISRCTN18181860). <http://www.isrctn.com/ISRCTN18181860>  
12  
13 486 (accessed 28 Aug 2020).  
14  
15 487 11 West EA, Anker D, Amati R, *et al.* Corona Immunitas: study protocol of a nationwide  
16  
17 488 program of SARS-CoV-2 seroprevalence and seroepidemiologic studies in Switzerland.  
18  
19 489 *Int J Public Health* 2020;:1–20. doi:10.1007/s00038-020-01494-0  
20  
21 490 12 Information for public schools. Preventive regulations | Canton of Zurich.  
22  
23 491 [https://www.zh.ch/de/gesundheit/coronavirus/informationen-rund-um-schulen-](https://www.zh.ch/de/gesundheit/coronavirus/informationen-rund-um-schulen-kitas-heime/coronavirus-volksschule.html#-1212670983)  
24  
25 492 [kitas-heime/coronavirus-volksschule.html#-1212670983](https://www.zh.ch/de/gesundheit/coronavirus/informationen-rund-um-schulen-kitas-heime/coronavirus-volksschule.html#-1212670983) (accessed 13 Nov 2020).  
26  
27 493 13 Institute of Medical Virology IMV SARS-CoV-2 Antikörper Differenzierung (ABCORA).  
28  
29 494 <https://www.virology.uzh.ch/dam/jcr:0f9bbdba-e215-4e42-a877-131a04a2e175/IMV>  
30  
31 495 ABCORA Serologie.pdf (accessed 16 Dec 2020).  
32  
33 496 14 Fenwick C, Croxatto A, Coste AT, *et al.* Changes in SARS-CoV-2 Spike versus  
34  
35 497 Nucleoprotein Antibody Responses Impact the Estimates of Infections in Population-  
36  
37 498 Based Seroprevalence Studies. *J Virol* Published Online First: 2020.  
38  
39 499 doi:10.1128/JVI.01828-20  
40  
41 500 15 Canton of Zurich. Numbers and Facts on COVID-19 [Kanton Zürich. Zahlen & Fakten zu  
42  
43 501 COVID-19]. [https://www.zh.ch/de/gesundheit/coronavirus/zahlen-fakten-covid-](https://www.zh.ch/de/gesundheit/coronavirus/zahlen-fakten-covid-19.html?keyword=covid19#/home)  
44  
45 502 [19.html?keyword=covid19#/home](https://www.zh.ch/de/gesundheit/coronavirus/zahlen-fakten-covid-19.html?keyword=covid19#/home) (accessed 13 Nov 2020).  
46  
47 503 16 Stringhini S, Wisniak A, Piumatti G, *et al.* Seroprevalence of anti-SARS-CoV-2 IgG  
48  
49 504 antibodies in Geneva, Switzerland (SEROCoV-POP): a population-based study. *Lancet*  
50  
51 505 2020;0. doi:10.1016/S0140-6736(20)31304-0  
52  
53 506 17 de Lusignan S, Dorward J, Correa A, *et al.* Risk factors for SARS-CoV-2 among patients  
54  
55 507 in the Oxford Royal College of General Practitioners Research and Surveillance Centre  
56  
57 508 primary care network: a cross-sectional study. *Lancet Infect Dis* 2020;20:1034–42.  
58  
59 509 doi:10.1016/S1473-3099(20)30371-6  
60  
61 510 18 Viner RM, Mytton OT, Bonell C, *et al.* Susceptibility to SARS-CoV-2 Infection Among  
62  
63 511 Children and Adolescents Compared With Adults. *JAMA Pediatr* Published Online  
64  
65 512 First: 25 September 2020. doi:10.1001/jamapediatrics.2020.4573

- 1 513 19 Xu W, Li X, Dozier M, *et al.* What is the evidence for transmission of COVID-19 by  
2 514 children in schools? A living systematic review. *medRxiv* Published Online First: 2020.  
3  
4 515 doi:10.1101/2020.10.11.20210658
- 5 516 20 Munro APS, Faust SN. COVID-19 in children. *Curr Opin Infect Dis* Published Online  
6  
7 517 First: 6 October 2020. doi:10.1097/QCO.0000000000000690
- 8  
9 518 21 Heavey L, Casey G, Kelly C, *et al.* No evidence of secondary transmission of COVID-19  
10  
11 519 from children attending school in Ireland, 2020. *Eurosurveillance* 2020;**25**:2000903.  
12  
13 520 doi:10.2807/1560-7917.ES.2020.25.21.2000903
- 14  
15 521 22 Szablewski CM, Chang KT, Brown MM, *et al.* SARS-CoV-2 Transmission and Infection  
16  
17 522 Among Attendees of an Overnight Camp — Georgia, June 2020. *MMWR Morb Mortal*  
18  
19 523 *Wkly Rep* 2020;**69**:1023–5. doi:10.15585/mmwr.mm6931e1
- 20  
21 524 23 Pollán M, Pérez-Gómez B, Pastor-Barriuso R, *et al.* Prevalence of SARS-CoV-2 in Spain  
22  
23 525 (ENE-COVID): a nationwide, population-based seroepidemiological study. *Lancet*  
24  
25 526 (*London, England*) 2020;**0**. doi:10.1016/S0140-6736(20)31483-5
- 26  
27 527 24 Waterfield T, Watson C, Moore R, *et al.* Seroprevalence of SARS-CoV-2 antibodies in  
28  
29 528 children - A prospective multicentre cohort study. *medRxiv*  
30  
31 529 2020;:2020.08.31.20183095. doi:10.1101/2020.08.31.20183095
- 32  
33 530 25 Esposito S, Principi N. School Closure during the Coronavirus Disease 2019 (COVID-19)  
34  
35 531 Pandemic: An Effective Intervention at the Global Level? *JAMA Pediatr.* 2020.  
36  
37 532 doi:10.1001/jamapediatrics.2020.1892
- 38  
39 533 26 Christakis DA. School Reopening-The Pandemic Issue That Is Not Getting Its Due.  
40  
41 534 *JAMA Pediatr.* 2020. doi:10.1001/jamapediatrics.2020.2068
- 42  
43 535 27 Götzinger F, Santiago-García B, Noguera-Julián A, *et al.* COVID-19 in children and  
44  
45 536 adolescents in Europe: a multinational, multicentre cohort study. *Lancet Child Adolesc*  
46  
47 537 *Heal* 2020;**4**:653–61. doi:10.1016/S2352-4642(20)30177-2
- 48  
49 538 28 Posfay-Barbe KM, Wagner N, Gauthey M, *et al.* COVID-19 in children and the  
50  
51 539 dynamics of infection in families. *Pediatrics* 2020;**146**. doi:10.1542/peds.2020-1576
- 52  
53 540 29 Stringhini S, Zaballa M-E, Perez-Saez J, *et al.* Seroprevalence of anti-SARS-CoV-2  
54  
55 541 antibodies after the second pandemic peak. *Lancet Infect Dis* 2021;**0**.  
56  
57 542 doi:10.1016/S1473-3099(21)00054-2
- 58  
59 543 30 Zhou W, Wang W, Wang H, *et al.* First infection by all four non-severe acute  
60  
544 respiratory syndrome human coronaviruses takes place during childhood. *BMC Infect*  
545  
546 545 *Dis* 2013;**13**:433. doi:10.1186/1471-2334-13-433
- 546 31 Ng KW, Faulkner N, Cornish GH, *et al.* Preexisting and de novo humoral immunity to

- 1 547 SARS-CoV-2 in humans. *Science (80- )* 2020;:eabe1107. doi:10.1126/science.abe1107
- 2 548 32 Viner R, Ward J, Hudson L, *et al.* Systematic review of reviews of symptoms and signs
- 3 of COVID-19 in children and adolescents. *medRxiv* 2020;:2020.10.16.20213298.
- 4 549 doi:10.1101/2020.10.16.20213298
- 5 550
- 6 551 33 Mayor S. Covid-19: UK studies find gastrointestinal symptoms are common in
- 7 552 children. doi:10.1101/2020.08.31.20183095v1
- 8 553 34 Struyf T, Deeks JJ, Dinnes J, *et al.* Signs and symptoms to determine if a patient
- 9 554 presenting in primary care or hospital outpatient settings has COVID-19 disease.
- 10 555 Cochrane Database Syst. Rev. 2020;2020. doi:10.1002/14651858.CD013665
- 11 556 35 COVID-19 Fragen und Antworten Teil 8 - pädiatrie schweiz.
- 12 557 <https://www.paediatricschweiz.ch/news/covid-19-fragen-und-antworten-teil-8/>
- 13 558 (accessed 23 Feb 2021).
- 14 559
- 15 560

1 **Figure legends**

2 562

3  
4 **Figure 1** Overall, school level and district estimates of SARS-CoV-2 seroprevalence in  
5 children

6  
7 Weighted point estimates and 95% credible intervals are shown. Districts are ordered by  
8 population size.

9  
10 ABCORA 2.0 – Primary estimate based on the ABCORA 2.0 of the Institute of Medical  
11 Virology, University of Zurich test. SenASTrIS – Estimate based on the SenASTrIS test.

12 569

13  
14 **Figure 2** Seropositive children in tested schools and school levels

15  
16 Each square illustrates an invited child. Each block of squares illustrates a school level in a  
17 school. Lower and middle levels are both taught in the primary schools; however, lower and  
18 middle levels of the same school are not matched in this graph due to protection of  
19 participant privacy. The distribution of the invited, tested and seropositive children is  
20 depicted only on the school level in the figures of this manuscript to preserve  
21 deidentification and privacy of the participants.  
22  
23

24 577

25  
26 **Figure 3** Self-reported symptoms in seropositive and seronegative children in January-June  
27 2020

28  
29 Point estimates and 95% confidence intervals are shown.

30 581

31 **Figure 4** Clustering of seropositive children in classes: number and proportion of

32 seropositive children in the tested classes

33  
34 Each dot represents a class. Diagonal lines partition the figure into classes with 0-5% of  
35 tested seropositive children (below 5% line), 5-10% of tested seropositive children (between  
36 5% and 10% lines), etc. Only classes where at least 5 children and at least 50% of the class  
37 were tested are shown. The distribution of seropositive children in the enrolled classes is  
38 only presented in an aggregated form rather than clustered within schools to preserve the  
39 deidentification and privacy of the participants.  
40  
41  
42  
43  
44  
45

46 590

47 **Supplemental material**

48 592

49  
50  
51 **Appendix 1** Description of Bayesian model

52 594

53

54

55

56

57

58

59

60

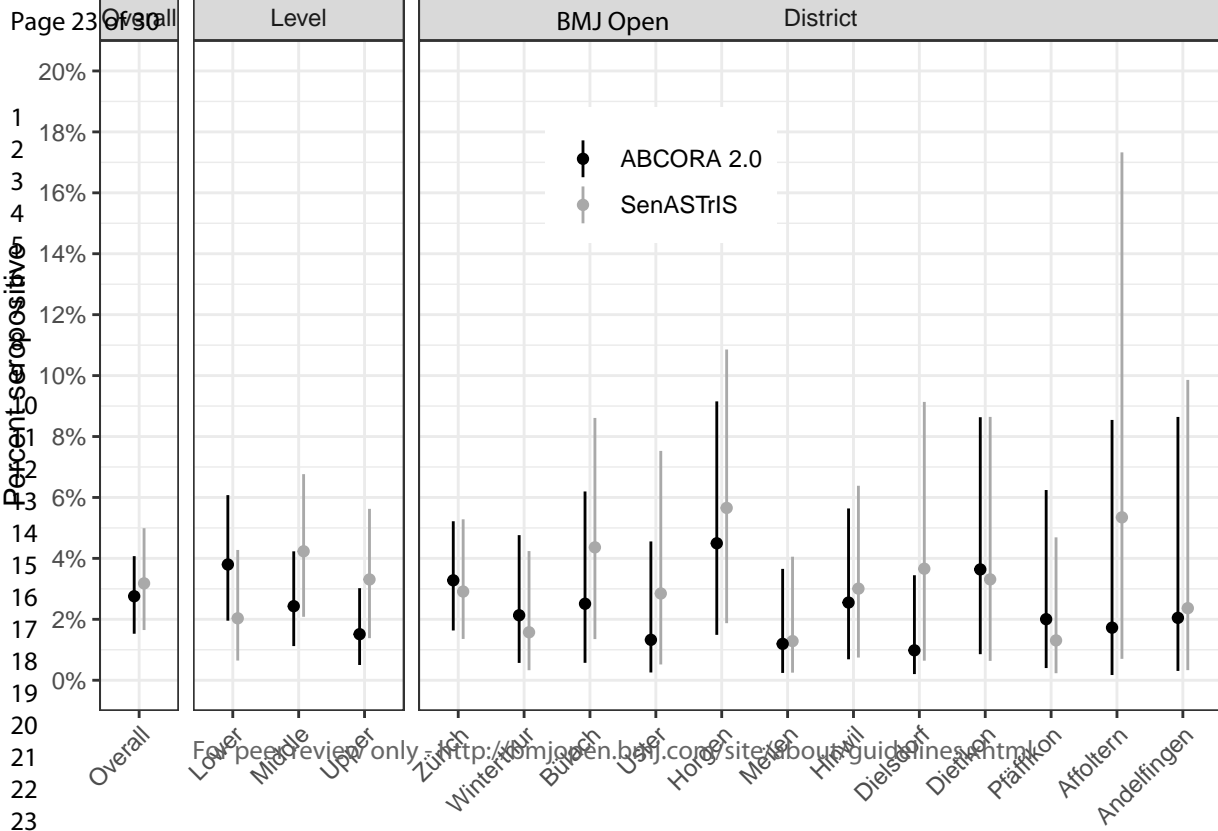

Lower level

BMJ Open



Middle level



Upper level



53  
54  
55  
56

1  
2  
3  
4  
5  
6  
7  
8  
9  
10  
11  
12  
13  
14  
15  
16  
17  
18  
19  
20  
21  
22  
23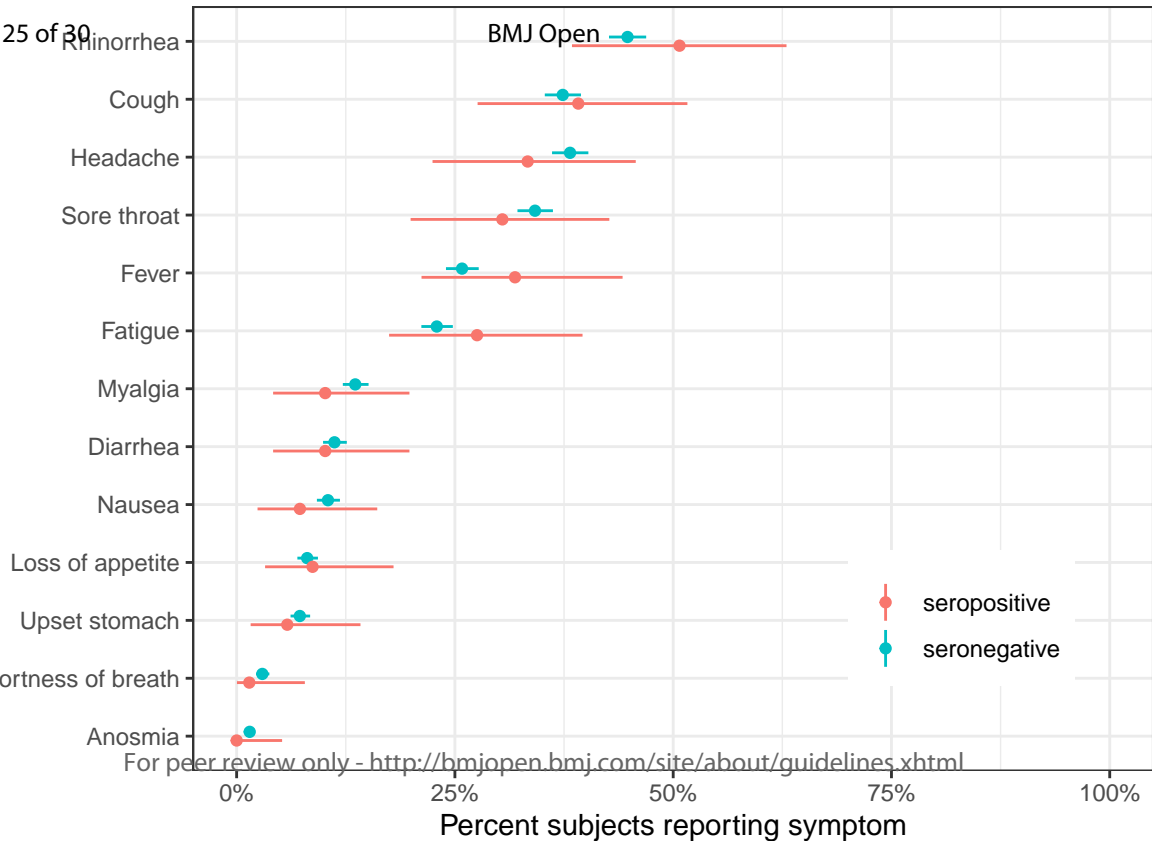

1  
2  
3  
4  
5  
6  
7  
8  
9  
10  
11  
12  
13  
14  
15  
16  
17  
18  
19  
20  
21  
22  
23  
24  
25  
26  
27  
28  
29  
30

- Lower
- ▲ Middle
- Upper



For peer review only - <http://bmjopen.bmj.com/site/about/guidelines.xhtml>

Number of tested children

20%

15%

10%

5%



# Variation in SARS-CoV-2 seroprevalence across districts, schools and classes: baseline measurements from a cohort of primary and secondary school children in Switzerland

## Appendix 1: Description of Bayesian model

A Ulyte, T Radtke, IA Abela, SR Haile, J Blankenberger, R Jung, C Capelli, C Berger, A Frei, M Huber, M Schanz, M Schwarzmüller, A Trkola, J Fehr, MA Puhon and S Kriemler

## Methods

The model formulation is essentially that proposed by “Seroprevalence of anti-SARS-CoV-2 IgG antibodies in Geneva, Switzerland (SEROCoV-POP): a population-based study” [Stringhini et al 2020](#) (see also the appendix to that paper), with full description and example code in their github repository [HopkinsIDD/serocovpop](#). Both *Ciao Corona* and *SEROCoV-POP* are part of the [Corona Immunitas](#) program of studies in Switzerland.

## Statistical model

In this paper, our goal is to estimate the true underlying seroprevalence of the population of schoolchildren (in grades 1, 2, 4, 5, 7, or 8) as measured in the of the Canton of Zurich, denoted  $p^*$ ).

We start by estimating the probability that each person in the survey is seropositive using a Bayesian logistic regression model that accounts for school-level clustering, the sensitivity and specificity of the antibody test, each individual’s grade level and sex:

$$\begin{aligned}x_i &\sim \text{Bernoulli}(p_i\theta^+ + (1 - p_i) * (1 - \theta^-)) \\ \text{logit}(p_i) &= \alpha_h + \mathbf{X}_i\boldsymbol{\beta} \\ \alpha_h &\sim \text{Normal}(0, \sigma^2) \\ x^+ &\sim \text{Binomial}(n^+, \theta^+) \\ x^- &\sim \text{Binomial}(n^-, 1 - \theta^-)\end{aligned}$$

where  $x_i$  is the result of the antibody test (in primary analyses) for the  $i$ th person ( $i = 1, \dots, N$ ) in the serosurvey. The sensitivity,  $\theta^+$ , is determined using  $n^+$  RT-PCR positive controls from the lab validation study, of which  $x^+$  tested positive. The specificity,  $\theta^-$ , is determined using  $n^-$  pre-pandemic negative controls, of which  $x^-$  tested positive. The model estimates of the sensitivity and specificity are shown below.

| <a href="#">ABCORA 2.0</a> | Cohort | N tested | N positive | N negative         |
|----------------------------|--------|----------|------------|--------------------|
| SARS-CoV-2 PCT Positive    | 104    | 97       | 7          | 93.27% sensitivity |
| pre-pandemic healthy       | 251    | 1        | 250        | 99.6% specificity  |

The probability of observing a diagnostic positive is a function of the true positive rate and the false negative rate with regards to the true underlying probability of seropositivity  $p_i$  for that person. This probability itself is a function of covariates  $\mathbf{X}$ , which consists of sex, grade level, and timepoint of testing, and their coefficients  $\beta$ , and a random effect for school,  $\alpha_h$  ( $h = 1, \dots, H$ ), with variance  $\sigma^2$ . We used naive priors on all parameters to allow for an exploration of the parameter space. The priors on the sensitivity and specificity were flat from 0 to 1, equivalent to *Uniform*(0, 1) or *Beta*(1, 1). We used weak *Normal*(0, 1) priors for the logistic regression coefficients  $\beta$ . The prior on the standard deviation of the school effect,  $\sigma$ , was flat from 0 to infinity.

We implemented this model in the [Stan](#) probabilistic programming language and used the [RStan](#) package in R to run the model and analyse outputs. We ran 5,000 iterations (4 chains with 1,500 iterations each with 250 for warm-up) and assessed convergence visually.

## Seroprevalence estimate

We estimated the seroprevalence  $p^*$  by post-stratifying the posterior samples of our parameter estimates to match the demographics of all schoolchildren in grades 1, 2, 4, 5, 7, or 8 in the Canton of Zurich. For every combination of grade level and sex, as well as timepoint of testing, we estimated the probability of seropositivity for each posterior draw of  $\beta$  and  $\sigma$ . We can find estimate the weekly seroprevalence by taking a weighted average of the  $p$ , where weights are determined by the demographic distribution of the Canton of Zurich:

$$p = \int_0^1 \text{logit}^{-1}(\mathbf{X}\beta + \sigma\Phi^{-1}(t))dt$$

$$p^* = \sum_{sex} \sum_{grade} \frac{pop_{sex,grade} * p_{sex,grade}}{pop}$$

where  $\Phi^{-1}(t)$  is the quantile function of a standard normal distribution,  $pop_{sex,grade}$  is the population of each demographic “cell” and  $pop$  is the school age population of the Canton of Zurich. We estimate the average probability of seropositivity for the population in each demographic cell by integrating across all values of a logit-normal distribution with the standard deviation defined by the school random effect  $\sigma$ .

## STROBE Statement—checklist of items that should be included in reports of observational studies

|                           | Item No. | Recommendation                                                                                                                                                                             | Page No. | Relevant text from manuscript                                                                                                                                                                             |
|---------------------------|----------|--------------------------------------------------------------------------------------------------------------------------------------------------------------------------------------------|----------|-----------------------------------------------------------------------------------------------------------------------------------------------------------------------------------------------------------|
| <b>Title and abstract</b> | 1        | (a) Indicate the study's design with a commonly used term in the title or the abstract                                                                                                     | 5        | first cross-sectional analysis of a large cohort of children from randomly selected schools and classes                                                                                                   |
|                           |          | (b) Provide in the abstract an informative and balanced summary of what was done and what was found                                                                                        | 3        |                                                                                                                                                                                                           |
| <b>Introduction</b>       |          |                                                                                                                                                                                            |          |                                                                                                                                                                                                           |
| Background/rationale      | 2        | Explain the scientific background and rationale for the investigation being reported                                                                                                       | 5        |                                                                                                                                                                                                           |
| Objectives                | 3        | State specific objectives, including any prespecified hypotheses                                                                                                                           | 3, 5     | To determine the variation in SARS-CoV-2 seroprevalence in school children across districts, schools, grades, and classes, and the relationship of SARS-CoV-2 seroprevalence with self-reported symptoms. |
| <b>Methods</b>            |          |                                                                                                                                                                                            |          |                                                                                                                                                                                                           |
| Study design              | 4        | Present key elements of study design early in the paper                                                                                                                                    | 6-8      |                                                                                                                                                                                                           |
| Setting                   | 5        | Describe the setting, locations, and relevant dates, including periods of recruitment, exposure, follow-up, and data collection                                                            | 6        |                                                                                                                                                                                                           |
| Participants              | 6        | (a) <i>Cohort study</i> —Give the eligibility criteria, and the sources and methods of selection of participants. Describe methods of follow-up                                            | 6        |                                                                                                                                                                                                           |
|                           |          | <i>Case-control study</i> —Give the eligibility criteria, and the sources and methods of case ascertainment and control selection. Give the rationale for the choice of cases and controls |          |                                                                                                                                                                                                           |
|                           |          | <i>Cross-sectional study</i> —Give the eligibility criteria, and the sources and methods of selection of participants                                                                      |          |                                                                                                                                                                                                           |
|                           |          | (b) <i>Cohort study</i> —For matched studies, give matching criteria and number of exposed and unexposed                                                                                   |          |                                                                                                                                                                                                           |

|                              |    |                                                                                                                                                                                      |     |                                             |
|------------------------------|----|--------------------------------------------------------------------------------------------------------------------------------------------------------------------------------------|-----|---------------------------------------------|
|                              |    | <i>Case-control study</i> —For matched studies, give matching criteria and the number of controls per case                                                                           |     |                                             |
| Variables                    | 7  | Clearly define all outcomes, exposures, predictors, potential confounders, and effect modifiers. Give diagnostic criteria, if applicable                                             | 7-8 |                                             |
| Data sources/<br>measurement | 8* | For each variable of interest, give sources of data and details of methods of assessment (measurement). Describe comparability of assessment methods if there is more than one group | 7-8 |                                             |
| Bias                         | 9  | Describe any efforts to address potential sources of bias                                                                                                                            | 7   |                                             |
| Study size                   | 10 | Explain how the study size was arrived at                                                                                                                                            | 6   | Details are provided in the study protocol. |

Continued on next page

|                        |     |                                                                                                                                                                                                                    |      |
|------------------------|-----|--------------------------------------------------------------------------------------------------------------------------------------------------------------------------------------------------------------------|------|
| Quantitative variables | 11  | Explain how quantitative variables were handled in the analyses. If applicable, describe which groupings were chosen and why                                                                                       | 7-8  |
| Statistical methods    | 12  | (a) Describe all statistical methods, including those used to control for confounding                                                                                                                              | 7-8  |
|                        |     | (b) Describe any methods used to examine subgroups and interactions                                                                                                                                                | NA   |
|                        |     | (c) Explain how missing data were addressed                                                                                                                                                                        | NA   |
|                        |     | (d) <i>Cohort study</i> —If applicable, explain how loss to follow-up was addressed                                                                                                                                | 7-8  |
|                        |     | <i>Case-control study</i> —If applicable, explain how matching of cases and controls was addressed<br><i>Cross-sectional study</i> —If applicable, describe analytical methods taking account of sampling strategy |      |
|                        |     | (e) Describe any sensitivity analyses                                                                                                                                                                              | NA   |
| <b>Results</b>         |     |                                                                                                                                                                                                                    |      |
| Participants           | 13* | (a) Report numbers of individuals at each stage of study—eg numbers potentially eligible, examined for eligibility, confirmed eligible, included in the study, completing follow-up, and analysed                  | 6    |
|                        |     | (b) Give reasons for non-participation at each stage                                                                                                                                                               | 6    |
|                        |     | (c) Consider use of a flow diagram                                                                                                                                                                                 | NA   |
| Descriptive data       | 14* | (a) Give characteristics of study participants (eg demographic, clinical, social) and information on exposures and potential confounders                                                                           | 6, 9 |
|                        |     | (b) Indicate number of participants with missing data for each variable of interest                                                                                                                                | 6-7  |
|                        |     | (c) <i>Cohort study</i> —Summarise follow-up time (eg, average and total amount)                                                                                                                                   |      |
| Outcome data           | 15* | <i>Cohort study</i> —Report numbers of outcome events or summary measures over time                                                                                                                                |      |
|                        |     | <i>Case-control study</i> —Report numbers in each exposure category, or summary measures of exposure                                                                                                               |      |
|                        |     | <i>Cross-sectional study</i> —Report numbers of outcome events or summary measures                                                                                                                                 | 9    |
| Main results           | 16  | (a) Give unadjusted estimates and, if applicable, confounder-adjusted estimates and their precision (eg, 95% confidence interval). Make clear which confounders were adjusted for and why they were included       | 9    |
|                        |     | (b) Report category boundaries when continuous variables were categorized                                                                                                                                          | NA   |
|                        |     | (c) If relevant, consider translating estimates of relative risk into absolute risk for a meaningful time period                                                                                                   | NA   |

Continued on next page

|                          |    |                                                                                                                                                                            |       |
|--------------------------|----|----------------------------------------------------------------------------------------------------------------------------------------------------------------------------|-------|
| Other analyses           | 17 | Report other analyses done—eg analyses of subgroups and interactions, and sensitivity analyses                                                                             | 9     |
| <b>Discussion</b>        |    |                                                                                                                                                                            |       |
| Key results              | 18 | Summarise key results with reference to study objectives                                                                                                                   | 11    |
| Limitations              | 19 | Discuss limitations of the study, taking into account sources of potential bias or imprecision. Discuss both direction and magnitude of any potential bias                 | 12-13 |
| Interpretation           | 20 | Give a cautious overall interpretation of results considering objectives, limitations, multiplicity of analyses, results from similar studies, and other relevant evidence | 13    |
| Generalisability         | 21 | Discuss the generalisability (external validity) of the study results                                                                                                      | 13    |
| <b>Other information</b> |    |                                                                                                                                                                            |       |
| Funding                  | 22 | Give the source of funding and the role of the funders for the present study and, if applicable, for the original study on which the present article is based              | 14    |

\*Give information separately for cases and controls in case-control studies and, if applicable, for exposed and unexposed groups in cohort and cross-sectional studies.

**Note:** An Explanation and Elaboration article discusses each checklist item and gives methodological background and published examples of transparent reporting. The STROBE checklist is best used in conjunction with this article (freely available on the Web sites of PLoS Medicine at <http://www.plosmedicine.org/>, Annals of Internal Medicine at <http://www.annals.org/>, and Epidemiology at <http://www.epidem.com/>). Information on the STROBE Initiative is available at [www.strobe-statement.org](http://www.strobe-statement.org).
